# Supplementary material for: Semantic and Geographical Analysis of COVID-19 Trials Reveals a Fragmented Clinical Research Landscape Likely to Impair Informativeness
Source: Front Med (Lausanne). 2020 Jun 29;7:367. doi: 10.3389/fmed.2020.00367 (PMC7336807; doi:10.3389/fmed.2020.00367)
Supplement: Supplementary file 4 [file Table_4.XLSX]

## Sheet: Sheet 1
TrialID	Title	Outcome.Measures	QUALITATIVE READOUT	NUMERICAL READOUT	Strength
NCT04334044	Treatment of SARS Caused by COVID-19 With Ruxolitinib	Recovery of Pneumonia|Response of C-reactive protein|Response of Ferritin|Response of D-dimer|Rate of ICU admission|Rate of mechanical ventilation|Overall Survival|Toxicity Rate	NA	NA	NA
NCT04328285	Chemoprophylaxis of SARS-CoV-2 Infection (COVID-19) in Exposed Healthcare Workers	Occurrence of an symptomatic or asymptomatic SARS-CoV-2 infection among healthcare workers (HCWs)|Evaluation of the occurrence of adverse events in each arm,|Evaluation of the discontinuation rates of the investigational drug in each arm,|Evaluation of the adherence of participants to study drug,|Evaluation of the incidence of symptomatic cases of SARS-CoV-2 infection in each arm,|Evaluation of t…	C	P	P
NCT04328493	The Vietnam Chloroquine Treatment on COVID-19	Viral clearance time|Lengh of hospital stay|Ventilator free days|Oxygene free days|Time to death|Adverse events|Time to viral PCR negative from rectal swab|fever clearance time|Ordinal outcome scale|Development of ARDS	V	T	S
NCT04312997	The Use of PUL-042 Inhalation Solution to Reduce the Severity of COVID-19 in Adults Positive for SARS-CoV-2 Infection	Severity of COVID-19|All cause mortality	C	Q	S
NCT04335552	Phase 2 Trial of Hydroxychloroquine, Azithromycin, or Both for Treatment of Severe SARS-CoV-2 Infection	World Health Organization (WHO) ordinal scale measured at 14 days after enrollment|Rates of death during the index hospitalization|Number of days on mechanical ventilation for patients who were on mechanical ventilation at baseline|Proportion of patients not receiving mechanical ventilation at baseline who progress to requiring mechanical ventilation during the index hospitalization|WHO ordinal s…	W	Q	H
NCT04333914	Prospective Study in Patients With Advanced or Metastatic Cancer and SARS-CoV-2 (COVID-19) Infection	28-day survival rate|Time to clinical improvement|Clinical status|Mean change in clinical status from baseline to days|Overall survival|Length of stay in Intensive Care Unit|Duration of mechanical ventilation or high flow oxygen devices|Duration of hospitalization|Rate of throat swab negativation|Quantitative SARS-CoV-2 virus in throat swab and blood samples|Rate of secondary infection by other d…	M	P	H
NCT04329611	ALBERTA HOPE COVID-19 for the Prevention of Severe COVID19 Disease	Composite of hospitalization, invasive mechanical ventilation or death within 30 days|mortality|Symptom duration|Disposition at 30 days defined as recovered, ongoing symptoms but not hospitalized, hospitalized, or deceased.	M	P	H
NCT04315896	Hydroxychloroquine Treatment for Severe COVID-19 Pulmonary Infection (HYDRA Trial)	All-cause hospital mortality|Length of hospital stay|Need of mechanical ventilation|Ventilator free days|Grade 3-4 adverse reaction	M	P	H
NCT04328012	COVID MED Trial - Comparison Of Therapeutics for Hospitalized Patients Infected With SARS-CoV-2	National Institute of Allergy and Infectious Diseases COVID-19 Ordinal Severity Scale (NCOSS)|Hospital length of stay (LOS)|Intensive care unit level LOS|Mechanical ventilation|survival	C	Q	S
NCT04335786	Valsartan for Prevention of Acute Respiratory Distress Syndrome in Hospitalized Patients With SARS-COV-2 (COVID-19) Infection Disease	first occurrence of intensive care unit admission, mechanical ventilation or death|Death|Mechanical ventilation|Intensive care unit admission|Occurrence of acute kidney injury	M	P	H
NCT04321993	Treatment of Moderate to Severe Coronavirus Disease (COVID-19) in Hospitalized Patients	Clinical status of subject at day 15 (on a 7 point ordinal scale).|Status on an ordinal scale assessed daily while hospitalized and on days 15 and 29 and 180.|Length of time to clinical improvement|Number of participants with normal pulmonary function and normal O2 saturation on days 11, 15 and 29|Number of participants that developed Acute Respiratory Distress Syndrome (ARDS) after treatment|Len…	C	P	S
NCT04334928	Randomized Clinical Trial for the Prevention of SARS-CoV-2 Infection (COVID-19) in Healthcare Personnel	Number of confirmed symptomatic infections of SARS-CoV-2 (COVID-19)|Severity of disease in confirmed infected participants of SARS-CoV-2 (COVID-19)|Duration of symptoms in confirmed infected participants of SARS-CoV-2 (COVID-19) measured in days	C	P	S
NCT04333355	Safety in Convalescent Plasma Transfusion to COVID-19	Side effects|Heart Failure|Pulmonary Edema|Allergic Reaction|Lung infiltrates|Viral load of SARS-CoV-2	C	P	T
NCT04333407	Preventing Cardiac Complication of COVID-19 Disease With Early Acute Coronary Syndrome Therapy: A Randomised Controlled Trial.	All-cause mortality at 30 days after admission|Absolute change in serum troponin from admission to peak value|Discharge Rate|Intubation Rate	M	P	H
NCT04304690	Sars-CoV2 Seroconversion Among Front Line Medical and Paramedical Staff in Emergency, Intensive Care Units and Infectious Disease Departments During the 2020 Epidemic	Quantify the proportion of patients with documented Sars-CoV2 infection among medical and paramedical staff|Identification of risk factors for seroconversion|Quantify the proportion of asymptomatic infections among staff who have seroconverted| Describe symptomatic infections for personnel developing acute clinical (respiratory or digestive) viral syndrome	V	P	P
NCT04335071	Tocilizumab in the Treatment of Coronavirus Induced Disease (COVID-19)	Number of patients with ICU admission|Number of patients with intubation|Number of patients with death|Illness severity|Number of patients with clinical improvement|Time to clinical improvement (days)|Duration of hospitalization (days)|Time to ICU admission (days)|Duration of ICU stay|Time to intubation|Duration of mechanical ventilation (days)	C	P	S
NCT04335032	EPA-FFA to Treat Hospitalised Patients With SARS-CoV-2	Efficacy of EPA-FFA|Increase in oxygen saturation|PaO2/FiO2 >300mmHg increase|Reduction of IL-6|Mortality rate reduction|Reduction in ICU stays|Reducing hospitalisation days|reduction in need for mechanical ventilation|Fever reduction	NA	NA	NA
NCT04313023	The Use PUL-042 Inhalation Solution to Prevent COVID-19 in Adults Exposed to SARS-CoV-2	Prevention of COVID-19	C	P	P
NCT04332107	Azithromycin for COVID-19 Treatment in Outpatients Nationwide	Hospitalization|Viral load|Mortality|Adverse events|Positive SARS-CoV-2 test - nasal swab|Positive SARS-CoV-2 test - saliva swab|Positive SARS-CoV-2 test - rectal swab|Genetic macrolide resistance determinants|COVID-19 symptoms|Number of emergency room visits|Number of household members with COVID-19 (confirmed or symptomatic)	C	P	S
NCT04333225	Hydroxychloroquine in the Prevention of COVID-19 Infection in Healthcare Workers	Rate of COVID-19 positive conversion|Time-to-first clinical event	V	P	S
NCT04332094	Clinical Trial of Combined Use of Hydroxychloroquine, Azithromycin, and Tocilizumab for the Treatment of COVID-19	In-hospital mortality|Need for mechanical ventilation in the Intensive Care Unit	M	P	H
NCT04323761	Expanded Access Treatment Protocol: Remdesivir (RDV; GS-5734) for the Treatment of SARS-CoV2 (CoV) Infection		NA	NA	NA
NCT04329572	Efficacy and Safety of Hydroxychloroquine and Azithromycin for the Treatment of Hospitalized Patients With Moderate to Severe COVID-19	Evolution of acute respiratory syndrome, oxygen saturation hemodynamic stability|Viral load|Change in Clinical Condition|Evolution of Acute Respiratory Syndrome|Hospital discharge|Rate of mortality within 28-days	C	Q	S
NCT04333550	Application of Desferal to Treat COVID-19	Mortality rate|change in patients clinical manifestation|change in patients PaO2|Length of hospitalization|C-reactive protein|lymphocyte count|length of intensive care unit stay	M	P	H
NCT04315480	Tocilizumab for SARS-CoV2 Severe Pneumonitis	arrest in deterioration of pulmonary function|improving in pulmonary function|need of oro-tracheal intubation|death	C	P	S
NCT04333472	Piclidenoson for Treatment of COVID-19	Duration of viral shedding in days|Time to clinical recovery (TTCR) in days|Treatment-emergent adverse events (AEs)|Requirement for non-invasive or mechanical ventilation|Length of hospital stay in days|Estimated PaO2/FiO2 ratio on day of discharge|All-cause mortality|Patients reaching undetectable COVID-19 virus levels in respiratory secretions|Duration of symptoms and signs of respiratory infec…	V	T	S
NCT04328961	Hydroxychloroquine for COVID-19 PEP	Polymerase chain reaction (PCR) confirmed SARS-CoV-2 infection|Rate of participant-reported adverse events|Incidence rates of COVID-19 through study completion	V	P	S
NCT04336332	Randomized Comparison of Combination Azithromycin and Hydroxychloroquine vs. Hydroxychloroquine Alone for the Treatment of Confirmed COVID-19	Changes in patients viral load|Second evaluation of changes in patients viral load|Symptom questionnaire|Fever assessment|Vital Signs - Body Temperature|Discharge|Recovery|Assessment of agent toxicity|Nasal swab sample collections|Blood Sample collections|Viral shedding assessment - nasopharyngeal secretions|Viral shedding assessment - serology|Cytokines in blood	V	P	S
NCT04336904	Clinical Study To Evaluate The Performance And Safety Of Favipiravir in COVID-19	Time from randomization to clinical recovery|Time from randomization to negativity in RT-PCR nucleic acid test|Incidence of deterioration/aggravation of pneumonia|Time from randomization to resolution of pyrexia|Time from randomization to relief of cough|Time from randomization to relief of dyspnoea|Rate of auxiliary oxygen therapy|ICU admission rate|Mortality	C	T	S
NCT04324489	DAS181 for Severe COVID-19: Compassionate Use	Improved clinical status|Return to room air|SARS-CoV-2 RNA|Discharge|Death	C	P	S
NCT04332042	TOFAcitinib in SARS-CoV2 Pneumonia	need of mechanical ventilation|need of admission in intensive care unit|death|rate of adverse events	C	P	S
NCT04307693	Comparison of Lopinavir/Ritonavir or Hydroxychloroquine in Patients With Mild Coronavirus Disease (COVID-19)	Viral load|Viral load change|Time to clinical improvement (TTCI)|Percentage of progression to supplemental oxygen requirement by day 7|Time to NEWS2 (National Early Warning Score 2) of 3 or more maintained for 24 hours by day 7|Time to clinical failure, defined as the time to death, mechanical ventilation, or ICU admission|Rate of switch to Lopinavir/ritonavir or hydroxychloroquine by day 7|adver…	V	Q	S
NCT04318431	Prevalence of SARS -Cov2 Carriage in Asymptomatic and Mildly-symptomatic Children	Proportion of asymptomatic children or children with mild respiratory symptoms|Confirmed Cov2-SARS cases by age|Confirmed Cov2-SARS cases by symptoms|Viral load|Other respiratory viruses	C	P	S
NCT04329195	ACE Inhibitors or ARBs Discontinuation in Context of SARS-CoV-2 Pandemic	Time to clinical improvement from day 0 to day 28 (improvement of two points on a seven-category ordinal scale, or live discharge from the hospital, whichever comes first)|Primary safety endpoint: major adverse cardiac events defined as the composite of cardiovascular death, myocardial infarction, stroke or acute heart failure at day 28|Clinical status as assessed with the seven-category ordinal …	C	T	S
NCT04335123	Study of Open Label Losartan in COVID-19	Number of participants with treatment-related adverse events as assessed by protocol definition of AE|Number of days on supplemental oxygen in respiratory failure due to COVID-19|Incidence of mechanical ventilation use|Days on mechanical ventilation|Incidence of non-invasive positive pressure ventilation or heated high flow nasal cannula use|Days on non-invasive positive pressure ventilation or h…	C	P	T
NCT04291053	The Efficacy and Safety of Huai er in the Adjuvant Treatment of COVID-19	Mortality rate|Clinical status assessed according to the official guideline|The differences in oxygen intake methods|Duration (days) of supplemental oxygenation|Duration (days) of mechanical ventilation|The mean PaO2/FiO2|Length of hospital stay (days)|Length of ICU stay (days)|Pulmonary function	M	P	H
NCT04325633	Efficacy of Addition of Naproxen in the Treatment of Critically Ill Patients Hospitalized for COVID-19 Infection	Mortality all causes at day30|Number of days alive free of mechanical ventilation|Number of days alive outside|Number of days alive outside hospital|Maximal changes in Sofa score|Time to negativation of virus titer in the nasopharyngeal aspirate (NPA)	M	P	H
NCT04318015	Hydroxychloroquine Chemoprophylaxis in Healthcare Personnel in Contact With COVID-19 Patients (PHYDRA Trial)	Symptomatic COVID-19 infection rate|Symptomatic non-COVID viral infection rate|Days of labor absenteeism|Rate of labor absenteeism|Rate of severe respiratory COVID-19 disease in healthcare personnel	C	P	S
NCT04329832	Hydroxychloroquine vs. Azithromycin for Hospitalized Patients With Suspected or Confirmed COVID-19	COVID Ordinal Outcomes Scale at 14 days|Hospital-free days at 28 days (number of days patient not in hospital)|Ventilator-free days at 28 days (number of days patient not on a ventilator)|ICU-free days at 28 days (number of days patient not in an ICU)|Time to a 1-point decrease in the WHO ordinal recovery score	W	Q	H
NCT04336462	Hydrogen-Oxygen Generator With Nebulizer in the Improvement of Symptoms in Patients Infected With COVID-19	Recovery time|Clinical Symptom Remission time|fever duration|Leicester cough questionaire (LCQ)|minimum oxygen|Negative conversion rate|white blood cell(WBC)|Red blood cells(RBC)|Hemoglobin(Hb )|Platelets(PLT)|Lymphocyte count|The percentage of lymphocyte|neutrophils|C-reactive protein (CRP)|Myocardial enzyme|liver function|Renal function|Muscle enzyme	C	T	S
NCT04319731	A Pilot Study of Human Amniotic Fluid for COVID19 Associated Respiratory Failure	Ventilator Free Days|Duration of supplemental oxygen use|All cause mortality|Systemic inflammation	C	T	S
NCT04340232	Safety and Efficacy of Baricitinib for COVID-19	Phase 2: Cumulative incidence of Grade 3 and 4 adverse events (AEs)|Phase 2: Cumulative incidence of serious adverse events (SAEs)|Phase 2: Changes in white blood cell count (CBC) through Day 15|Phase 2: Changes in hemoglobin through Day 15|Phase 2: Changes in platelets through Day 15|Phase 2: Changes in creatinine through Day 15|Phase 2: Changes in glucose through Day 15|Phase 2: Changes in prot…	C	P	T
NCT04324021	Efficacy and Safety of Emapalumab and Anakinra in Reducing Hyperinflammation and Respiratory Distress in Patients With COVID-19 Infection.	Treatment success|Time to mechanical ventilation|Change from baseline in Modified Early Warning system score|Change from baseline in resting peripheral capillary oxygen saturation (SpO2)|Change from baseline in partial pressure of oxygen/fraction of inspired oxygen (PaO2/FiO2)|Change of pH in hemogasanalysis from baseline|Change of carbon dioxide tension (pCO2) in hemogasanalysis from baseline|Ch…	C	P	S
NCT04318444	Hydroxychloroquine Post Exposure Prophylaxis for Coronavirus Disease (COVID-19)	Number of participants with symptomatic, lab-confirmed COVID-19.	V	P	P
NCT04339712	Personalised Immunotherapy for SARS-CoV-2 (COVID-19) Associated With Organ Dysfunction	Decrease of baseline total sequential organ failure assessment (SOFA) score|Improvement of lung involvement measurements|Increase of pO2/FiO2 ratio|Comparison of change of baseline total sequential organ failure assessment (SOFA) score in enrolled subjects towards historical comparators|Comparison of change of lung involvement measurements in enrolled subjects towards historical comparators|Compa…	C	Q	S
NCT04323228	Anti-inflammatory/Antioxidant Oral Nutrition Supplementation in COVID-19	Change from baseline score of Nutrition risk screening-2002 (NRS-2002) at end of the trial|Change from baseline Serum ferritin level at end of the trial|Change from baseline serum Interleukin-6 concentration at end of the trial|Change from baseline serum C-reactive protein concentration at end of the trial|Change from baseline serum Tumor necrosis factor-α concentration at end of the trial|Change…	C	Q	S
NCT04330144	Hydroxychloroquine as Post Exposure Prophylaxis for SARS-CoV-2(HOPE Trial)	The rate of COVID-19	V	P	S
NCT04333420	Open-label, Randomized Study of IFX-1 in Patients With Severe COVID-19 Pneumonia	Change in PaO2/FiO2|Patients achieving early response	C	Q	S
NCT04321421	Hyperimmune Plasma for Critical Patients With COVID-19	death|time to extubation|length of intensive care unit stay|time to CPAP weaning|viral load|immune response	M	P	H
NCT04330586	A Trial of Ciclesonide in Adults With Mild COVID-19	Rate of SARS-CoV-2 eradication at day 14 from study enrollment|Rate of SARS-CoV-2 eradication at day 7 from study enrollment|Time to SARS-CoV-2 eradication (days)|Viral load area-under-the-curve (AUC) reduction versus control|Time to clinical improvement (days)|Proportion of clinical failure	V	P	S
NCT04323332	Traditional Chinese Medicine for Severe COVID-19	Length of hospital stay (days)|Duration (days) of supplemental oxygenation|CT imaging changes|Mortality rate|Time to Clinical Improvement (TTCI)|The pneumonia severity index scores|Time to COVID-19 nucleic acid testing negativity in throat swab|Blood immune cell count|Serum inflammatory markers|Erythrocyte sedimentation rate|Platelet and D-dimer changes|Creatinine changes|Muscle enzymes changes|U…	C	T	S
NCT04334382	Hydroxychloroquine vs. Azithromycin for Outpatients in Utah With COVID-19	Hospitalization within 14 days of enrollment|Duration of COVID-19-attributable symptoms|Hospital-free days at 28 days|Ventilator-free days at 28 days|ICU-free days at 28 days	C	P	S
NCT04339660	Clinical Research of Human Mesenchymal Stem Cells in the Treatment of COVID-19 Pneumonia	The immune function (TNF-α 、IL-1β、IL-6、TGF-β、IL-8、PCT、CRP)|Blood oxygen saturation|Rate of mortality within 28-days|Size of lesion area by chest imaging|CD4+ and CD8+ T cells count|Peripheral blood count recovery time|Duration of respiratory symptoms (fever, dry cough, difficulty breathing, etc.)|COVID-19 nucleic acid negative time	L	Q	S
NCT04313322	Treatment of COVID-19 Patients Using Wharton's Jelly-Mesenchymal Stem Cells	Clinical outcome|CT Scan|RT-PCR results	C	Q	S
NCT04324996	A Phase I/II Study of Universal Off-the-shelf NKG2D-ACE2 CAR-NK Cells for Therapy of COVID-19	Clinical response|Side effects in the treatment group	C	P	S
NCT04315298	Evaluation of the Efficacy and Safety of Sarilumab in Hospitalized Patients With COVID-19	Percent change in C-reactive protein (CRP) levels|Time to improvement (2 points) in clinical status assessment using the 7-point ordinal scale in patients with serum IL-6 levels greater than the upper limit of normal|Time to improvement (2 points) in clinical status assessment on the 7-point ordinal scale in severe or critical patients with serum IL-6 levels greater than the upper limit of normal…	L	Q	S
NCT04330638	Treatment of COVID-19 Patients With Anti-interleukin Drugs	Time to Clinical Improvement|Time to improvement in oxygenation|Mean change in oxygenation|Number of days with hypoxia|Number of days of supplemental oxygen use|Time to absence fever for more than 48h without antipyretics|Number of days with fever|Time to halving of CRP levels compared to peak value during trial|Time to halving of ferritin levels compared to peak value during trial|Incidence of A…	C	T	S
NCT04334460	Safety and Antiviral Activity of BLD-2660 in COVID-19 Hospitalized Subjects	Antiviral Activity|Improvement of oxygenation|Safety & Tolerability: incidence of TEAEs and serious adverse events (SAEs)	V	Q	S
NCT04340557	Do Angiotensin Receptor Blockers Mitigate Progression to Acute Respiratory Distress Syndrome With SARS-CoV-2 Infection	Mechanical ventilation|ICU transfer|Oxygen therapy	C	P	S
NCT04323527	Chloroquine Diphosphate for the Treatment of Severe Acute Respiratory Syndrome Secondary to SARS-CoV2	Absolute mortality at day 28|Absolute mortality on days 7 and 14|Improvement in overall subject's clinical status assessed in standardized clinical questionnaires on days 14 and 28|Improvement in daily clinical status assessed in standardized clinical questionnaires during hospitalization|Duration of supplemental oxygen (if applicable)|Duration of mechanical ventilation (if applicable)|Absolute d…	M	P	H
NCT04308317	Tetrandrine Tablets Used in the Treatment of COVID-19	Survival rate|body temperature	M	P	H
NCT04317092	Tocilizumab in COVID-19 Pneumonia (TOCIVID-19)	One-month mortality rate|Interleukin-6 level|Lymphocyte count|CRP (C-reactive protein) level|PaO2 (partial pressure of oxygen) / FiO2 (fraction of inspired oxygen, FiO2) ratio (or P/F ratio)|Change of the SOFA (Sequential Organ Failure Assessment)|Number of participants with treatment-related side effects as assessed by Common Terminology Criteria for Adverse Event (CTCAE) version 5.0|Radiologica…	M	P	H
NCT04326920	Sargramostim in Patients With Acute Hypoxic Respiratory Failure Due to COVID-19 (SARPAC)	Improvement in oxygenation at a dose of 250 mcg daily during 5 days improves oxygenation in COVID-19 patients with acute hypoxic respiratory failure|Incidence of AE (Adverse Event)|Incidence of SAEs (Serious Adverse Event)|Clinical Status using 6-point ordinal scale|Clinical Status using Clincal sign score|Clinical Status using SOFA score (Sequential Organ Failure Assessment score),|Clinical Stat…	C	Q	S
NCT04331899	Mild COVID-19 Peginterferon Lambda	Duration of Viral shedding of SARS-CoV-2 by qRT-PCR	V	T	S
NCT04337996	Dynamic Evaluation of COVID-19 Diagnostic Tests	Positive or negative character of the three tests|sensitivity and specificity of the tests according to the time elapsed since the first symptoms	L	P	P
NCT04331600	ChloroQUine As antiviRal treAtmeNT In coroNavirus infEction 2020	COVID-19-related hospitalization or all-cause death|Decrease in COVID-19 symptoms|Development of pneumonia|Development of coronavirus infection-related complications	M	P	H
NCT04332081	Hyperbaric Oxygen for COVID-19 Patients	Mortality|Days on invasive mechanical ventilation	M	P	H
NCT04304313	A Pilot Study of Sildenafil in COVID-19	Rate of disease remission|Rate of entering the critical stage|Time of entering the critical stage|Rate of no fever|Rate of respiratory symptom remission|Rate of lung imaging recovery|Rate of C-reactive protein (CRP) recovery|Rate of Biochemical criterion (CK, ALT, Mb) recovery|Rate of undetectable viral RNA (continuous twice)|Time for hospitalization|Rate of adverse event	C	P	S
NCT04337541	Reduction in COVID-19 Infection Using Surgical Facial Masks Outside the Healthcare System	Reduction in COVID-19 infection frequency|Antibody-screening	C	P	S
NCT04338347	CAP-1002 in Severe COVID-19 Disease		NA	NA	NA
NCT04340544	Hydroxychloroquine for the Treatment of Mild COVID-19 Disease	Difference in time to resolution of clinical signs and symptoms of mild COVID-19 treated with hydroxychloroquine or placebo as assessed by daily self-assessment|Difference between hydroxychloroquine- and placebotreated patients on an ordinal outcome scale until Day 28 (death, admission to intensive care, hospitalization, continuing disease, recovered)|All-cause mortality within 28 days	C	T	S
NCT04334512	A Study of Quintuple Therapy to Treat COVID-19 Infection	Successful treatment as determined by Negative Test and resolution of symptoms|Safety of Quintuple Therapy	C	P	S
NCT04280588	Fingolimod in COVID-19	The change of pneumonia severity on X-ray images	R	Q	S
NCT04329923	The PATCH Trial (Prevention And Treatment of COVID-19 With Hydroxychloroquine)	Median release from quarantine time|Rate of hospital discharge|Rate of infection|Rate of housemate infection|Rate of hospitalization|Cohort 1 adverse event rate|Time to condition appropriate for discharge|Rate of ICU admission|Time to PCR negativity|Cohort 2 adverse events|Scheduled shifts missed|Cohort 3 adverse events	C	T	P
NCT04330690	Treatments for COVID-19: Canadian Arm of the SOLIDARITY Trial	Efficacy of Intervention|Time to improvement of one catergory from admission|Subject clinical status|Change in Subject clinical status|Oxygen free days|Incidence of oxygen use|Duration of oxygen use|Incidence of new mechanical ventilation|Duration of mechanical ventilation|Duration of hospitalization|Mortality|Cumulative Incidence of Grade 3 and 4 Adverse Events (AEs) and Serious Adverse Events (…	W	Q	H
NCT04333628	Chloroquine for Mild Symptomatic and Asymptomatic COVID-19	change in virus duration (viral shedding)|change in the number of patients going from asymptomatic to moderately disease	V	T	S
NCT04328441	Reducing Health Care Workers Absenteeism in Covid-19 Pandemic Through BCG Vaccine	Health Care Workers absenteeism|The cumulative incidence of documented SARS-CoV-2 infection|The number of days of unplanned absenteeism, because of documented SARS-CoV-2 infection|The number of days of absenteeism, because of imposed quarantine as a result of exposure to SARS-CoV-2 infection|The number of days of absenteeism, because of imposed quarantine as a result of having acute respiratory s…	C	P	P
NCT04304053	Treatment of COVID-19 Cases and Chemoprophylaxis of Contacts as Prevention	Effectiveness of chemoprophylaxis assessed by incidence of secondary COVID-19 cases|The virological clearance rate of throat swabs, sputum, or lower respiratory tract secretions at days 3|The mortality rate of subjects at weeks 2|Proportion of participants that drop out of study|Proportion of participants that show non-compliance with study drug	C	P	P
NCT04323592	Efficacy of Methylprednisolone for Patients With COVID-19 Severe Acute Respiratory Syndrome	Composite primary end-point|death|Admission to ICU|Endotracheal intubation (invasive mechanical ventilation)|reduction of C-reactive protein or CRP|Reduction of mechanical ventilation	M	P	H
NCT04335136	Recombinant Human Angiotensin-converting Enzyme 2 (rhACE2) as a Treatment for Patients With COVID-19	Cause of death or invasive mechanical ventilation|LDH level|Mortality|VFD|Time to death	M	P	H
NCT04331366	Bidirectional Oxygenation Valve in the Management of Pulmonary Complications of COVID-19	Change in Oxygen Saturation by Pulse Oximetry|Change in Respiratory Rate|Change in Heart Rate|Change in Blood Pressure|Change in Subjective Work of Breathing|Change in Partial Pressure of Oxygen (PaO2)|Change in Partial Pressure of Carbon Dioxide (PaCO2)|Change in pH|Change in Bicarbonate (HCO3)|Change in Oxygen Saturation (O2Sat) by Arterial Blood Gas Test	C	Q	S
NCT04331795	Tocilizumab to Prevent Clinical Decompensation in Hospitalized, Non-critically Ill Patients With COVID-19 Pneumonitis	Clinical response|Biochemical response|Overall survival|Survival to hospital discharge|Progression of COVID-19 pneumonitis|Rate of non-elective mechanical ventilation|Duration of mechanical ventilation|Time to mechanical ventilation|Rate of vasopressor/inotrope utilization|Duration of vasopressor/inotrope utilization|Time to vasopressor or inotropic utilization|Number of ICU days	C	P	S
NCT04335084	A Study of Hydroxychloroquine, Vitamin C, Vitamin D, and Zinc for the Prevention of COVID-19 Infection	Prevention of COVID-19 measured by negative testing with RT-PCR|Safety as determined by blood pressure readings|Safety as determined by presence of side effects	V	P	P
NCT04323631	Hydroxychloroquine for the Treatment of Patients With Mild to Moderate COVID-19 to Prevent Progression to Severe Infection or Death	Number patients developing severe infection or death	M	P	H
NCT04299152	Stem Cell Educator Therapy Treat the Viral Inflammation Caused by Severe Acute Respiratory Syndrome Coronavirus 2	Determine the number of Covid-19 patients who were unable to complete SCE Therapy|Examine the percentage of activated T cells after SCE therapy by flow cytometry|Assess the percentage of Th17 cells after SCE therapy by flow cytometry|Chest imaging changes by computed tomography (CT) scan of the chest|Quantification of the SARS-CoV-2 viral load by real time RT-PCR	C	P	S
NCT04331834	Pre-Exposure Prophylaxis With Hydroxychloroquine for High-Risk Healthcare Workers During the COVID-19 Pandemic	Confirmed cases of a COVID-19|SARS-CoV-2 seroconversion|Occurrence of any adverse event related with hydroxychloroquine treatment|Incidence of SARS-CoV-2 infection and COVID-19 among healthcare workers|Risk ratio for the different clinical, analytical and microbiological conditions to develop COVID-19|COVID-19 Biobank	V	P	P
NCT04337216	Mavrilimumab to Reduce Progression of Acute Respiratory Failure in Patients With Severe COVID-19 Pneumonia and Systemic Hyper-inflammation	Time to resolution of fever|Change in clinical status|Mortality|Change in CRP|Change in IL-6	C	T	S
NCT04336254	Safety and Efficacy Study of Allogeneic Human Dental Pulp Mesenchymal Stem Cells to Treat Severe COVID-19 Patients	TTCI|Lung lesion|Immune function|Time of SARS-CoV-2 clearance|Blood test|SPO2|RR|Body temperature|Side effects in the treatment group|C-reactive protein (mg/L)	C	T	S
NCT04292899	Study to Evaluate the Safety and Antiviral Activity of Remdesivir (GS-5734™) in Participants With Severe Coronavirus Disease (COVID-19)	The Odds of Ratio for Improvement on a 7-point Ordinal Scale on Day 14|Proportion of Participants Experiencing any Treatment-Emergent Adverse Events	W	Q	H
NCT04334980	Evaluating the Safety, Tolerability and Immunogenicity of bacTRL-Spike Vaccine for Prevention of COVID-19	Frequency of Adverse Events|SARS-CoV-2 Antibodies|Incidence of COVID-19 infection|bacTRL-Spike in stool post-vaccination	C	P	T
NCT04292730	Study to Evaluate the Safety and Antiviral Activity of Remdesivir (GS-5734™) in Participants With Moderate Coronavirus Disease (COVID-19) Compared to Standard of Care Treatment	The Odds of Ratio for Improvement on a 7-point Ordinal Scale on Day 11|Proportion of Participants experiencing Treatment-Emergent Adverse Events	W	Q	H
NCT04306393	Nitric Oxide Gas Inhalation in Severe Acute Respiratory Syndrome in COVID-19	Change of arterial oxygenation at 48 hours from enrollment|Time to reach normoxemia during the first 28 days after enrollment|Proportion of SARS-nCoV-2 free patients during the first 28 days after enrollment|Survival at 28 days from enrollment|Survival at 90 days from enrollment	C	Q	S
NCT04333368	Cell Therapy Using Umbilical Cord-derived Mesenchymal Stromal Cells in SARS-CoV-2-related ARDS	Respiratory efficacy evaluated by the increase in PaO2/FiO2 ratio from baseline to day 7 in the experimental group compared with the placebo group|Lung injury score|Oxygenation index|In-hospital mortality|Mortality|Ventilator-free days|Number of days between randomization and the first day the patient meets weaning criteria o Number of days between randomization and the first day the patient meet…	C	Q	S
NCT04317040	CD24Fc as a Non-antiviral Immunomodulator in COVID-19 Treatment	Improvement of COVID-19 disease status|Conversion rate of clinical status at Day 8|Conversion rate of clinical status at Day 15|Hospital discharge time|All cause of death|Duration of mechanical ventilation|Duration of pressors|Duration of ECMO|Duration of oxygen therapy|Length of hospital stay|Absolute lymphocyte count	C	Q	S
NCT04331470	Evaluation of Efficacy of Levamisole and Formoterol+Budesonide in Treatment of COVID-19	Clear chest CT-scan|PCR test|Physical statues of patient	R	P	S
NCT04315987	NestCell® Mesenchymal Stem Cell to Treat Patients With Severe COVID-19 Pneumonia	Disappear time of ground-glass shadow in the lungs|Rate of mortality within 28-days|Change of Clinical symptoms including duration of fever and respiratory|Time of nucleic acid turning negative|CD4+ and CD8+ T cell count|Changes of blood oxygen|Side effects in the treatment group	R	T	S
NCT04305106	Bevacizumab in Severe or Critically Severe Patients With COVID-19 Pneumonia-RCT	The time from randomization to clinical improvement	C	T	S
NCT04320615	A Study to Evaluate the Safety and Efficacy of Tocilizumab in Patients With Severe COVID-19 Pneumonia	Clinical Status Assessed Using a 7-Category Ordinal Scale|Time to Clinical Improvement (TTCI), Defined as a National Early Warning Score 2 (NEWS2) of </= 2 Maintained for 24 Hours|Time to Improvement of at Least 2 Categories Relative to Baseline on a 7-Category Ordinal Scale of Clinical Status|Incidence of Mechanical Ventilation|Ventilator-Free Days to Day 28|Organ Failure-Free Days to Day 28|Inc…	W	Q	H
NCT04321616	The Efficacy of Different Anti-viral Drugs in (Severe Acute Respiratory Syndrome-Corona Virus-2) SARS-CoV-2	In-hospital mortality|Occurrence and duration of mechanical ventilation|Occurrence and duration of intensive care unit (ICU) treatment|Duration of hospital admittance|28 Day mortality|Viral clearance as assessed by SARS-CoV-2 PCR in peripheral blood and nasopharyngeal airway speciemen|Occurrence of co-infections|Occurrence of organ dysfunction	M	P	H
NCT04273529	The Efficacy and Safety of Thalidomide in the Adjuvant Treatment of Moderate New Coronavirus (COVID-19) Pneumonia	Time to Clinical recoveryTime to Clinical Recovery (TTCR)|All cause mortality|Frequency of respiratory progression|Time to defervescence	C	T	S
NCT04273581	The Efficacy and Safety of Thalidomide Combined With Low-dose Hormones in the Treatment of Severe COVID-19	Time to Clinical Improvement (TTCI)|Clinical status|Time to Hospital Discharge OR NEWS2 (National Early Warning Score 2) of ≤ 2 maintained for 24 hours|All cause mortality|Duration (days) of mechanical ventilation|Duration (days) of extracorporeal membrane oxygenation|Duration (days) of supplemental oxygenation|Length of hospital stay (days)|Time to 2019-nCoV RT-PCR negativity in upper and lower …	C	T	S
NCT04321278	Safety and Efficacy of Hydroxychloroquine Associated With Azithromycin in SARS-CoV2 Virus (Coalition Covid-19 Brasil II)	Evaluation of the clinical status|All-cause mortality|Number of days free from mechanical ventilation|Duration of mechanical ventilation|Duration of hospitalization|Other secondary infections|Time from treatment start to death	W	Q	H
NCT04288102	Treatment With Mesenchymal Stem Cells for Severe Corona Virus Disease 2019(COVID-19)	Size of lesion area and severity of pulmonary fibrosis by chest CT|mMRC (Modified Medical Research Council) dyspnea scale|Oxygenation index( PaO2/FiO2)|Duration of oxygen therapy(days)|Duration of hospitalization(days)|Blood oxygen saturation|CD4+ T cell count and cytokine level|Side effects in the MSCs treatment group|6-minute walk test|Maximum vital capacity (VCmax)|Diffusing Capacity (DLCO)	R	Q	S
NCT04338074	TXA and Corona Virus 2019 (COVID19) in Outpatients	Hospitalization	C	P	S
NCT04295551	Multicenter Clinical Study on the Efficacy and Safety of Xiyanping Injection in the Treatment of New Coronavirus Infection Pneumonia (General and Severe)	Clinical recovery time	C	T	S
NCT04329650	Efficacy and Safety of Siltuximab vs. Corticosteroids in Hospitalized Patients With COVID19 Pneumonia	Proportion of patients requiring ICU admission at any time within the study period.|Days of stay in the ICU during the study period.|Days until resolution of fever defined as body temperature (axillary ≤ 36.6 ° C, oral ≤ 37.2 ° C, or rectal or tympanic ≤ 37.8 ° C) for at least 48 hours, without administration of antipyretics or until hospital discharge.|Proportion of patients with a worsening req…	C	P	S
NCT04323345	Efficacy of Natural Honey Treatment in Patients With Novel Coronavirus	Rate of recovery from positive to negative swaps|Fever to normal temperature in days|Resolution of lung inflammation in CT or X ray|30 days mortality rate|Number of days till reaching negative swab results	V	P	S
NCT04325061	Efficacy of Dexamethasone Treatment for Patients With ARDS Caused by COVID-19	60-day mortality|Ventilator-free days	M	P	H
NCT04335201	Defibrotide in COVID-19 Pneumonia	to able to reduce the progression of acute respiratory failure|Adverse events|duration of hospitalization|systemic inflammation|overall survival	C	Q	S
NCT04322682	Colchicine Coronavirus SARS-CoV2 Trial (COLCORONA)	Number of participants who die or require hospitalization due to COVID-19 infection|Number of participants who die|Number of participants requiring hospitalization due to COVID-19 infection|Number of participants requiring mechanical ventilation	M	P	H
NCT04286503	The Clinical Study of Carrimycin on Treatment Patients With COVID-19	Fever to normal time (day)|Pulmonary inflammation resolution time (HRCT) (day)|Negative conversion (%) of 2019-nCOVRNA in gargle (throat swabs) at the end of treatment	C	T	S
NCT04323800	Efficacy and Safety Human Coronavirus Immune Plasma (HCIP) vs. Control (SARS-CoV-2 Non-immune Plasma) Among Adults Exposed to COVID-19	Cumulative incidence of composite outcome of disease severity|Anti-SARS-CoV-2 titers|Rates of SARS-CoV-2 PCR positivity|Duration of SARS-CoV-2 PCR positivity|Peak quantity levels of SARS-CoV-2 RNA|Cumulative incidence of disease severity	M	P	H
NCT04303299	Various Combination of Protease Inhibitors, Oseltamivir, Favipiravir, and Hydroxychloroquine for Treatment of COVID19 : A Randomized Control Trial	SARS-CoV-2 eradication time|Number of patient with Death|Number of patient with Recovery adjusted by initial severity in each arm|Number of day With ventilator dependent adjusted by initial severity in each arm|Number of patient developed Acute Respiratory Distress Syndrome After treatment	V	T	S
NCT04321096	The Impact of Camostat Mesilate on COVID-19 Infection	Days to clinical improvement from study enrolment|Safety evaluation, as measured by AEs, Adverse Reactions (ARs), SAEs, Serious ARs (SARs)|Clinical status as assessed by the 7-point ordinal scale at day 7, 14 and 30|Day 30 mortality|Change in NEW(2) score from baseline to day 30|Admission to ICU|Use of invasive mechanical ventilation or ECMO|Duration of supplemental oxygen (days)|Days to self-rep…	C	T	S
NCT04316728	Clinical Performance of the VivaDiag ™ COVID-19 lgM / IgG Rapid Test in Early Detecting the Infection of COVID-19	Number of patients with constant negative results|Number of patients with positive test with a positive PCR for COVID-19|Overall Number of patients positive for COVID-19|Overall Number of patients negative for COVID-19|Number of patients with contrasting results|Reliability of the test|Positive HCW|Number of Chronic Patients	V	P	S
NCT04315948	Trial of Treatments for COVID-19 in Hospitalized Adults	Percentage of subjects reporting each severity rating on a 7-point ordinal scale|Percentage of subjects reporting each severity rating on a 7-point on an ordinal scale|The time to discharge or to a NEWS of ≤ 2 and maintained for 24 hours, whichever occurs first.|Number of oxygenation free days in the first 28 days|Incidence of new oxygen use, non-invasive ventilation or high flow oxygen devices d…	V	Q	H
NCT04327349	Investigating Effect of Convalescent Plasma on COVID-19 Patients Outcome: A Clinical Trial	Mortality changes in day 10|Mortality changes in day 30|Changes of C-reactive protein|Changes of Interleukin 6|Changes of tumor necrosis factor-α|Changes of PaO2/FiO2 Ratio|Changes of CD3|Changes of CD4|Changes of CD8|Changes of CD4/CD8 ratio|Changes of lymphocyte count|Changes of leukocyte count|Changes of alanine transaminase (ALT)|Changes of aspartate transaminase (AST)|Changes of alkaline pho…	M	P	H
NCT04337359	Ruxolitinib Managed Access Program (MAP) for Patients Diagnosed With Severe/Very Severe COVID-19 Illness		NA	NA	NA
NCT04339816	Azithromycin Added to Hydrochloroquine in Patients Admitted to Intensive Care With COVID-19: Randomised Controlled Trial	Proportion of alive patients free off mechanical ventilation|Proportion of patients who avoided the need of mechanical ventilation|ICU LOS|Mortality28|Mortality90	C	P	H
NCT04338841	HOME-CoV: Hospitalization or Outpatient ManagEment of Patients With a SARS-CoV-2 Infection	the composite rate of adverse outcomes|The rate of hospitalization	C	P	T
NCT04337788	Gerontological Telemonitoring of Older Adults Living in Nursing Homes With COVID-19 Disease	Impact of Gerontological telemonitoring on healthcare management for older adults living in Nursing Homes with symptoms of confirmed or probable COVID-19 disease (Death within 30 days).	C	Q	P
NCT04334005	Vitamin D on Prevention and Treatment of COVID-19	Composite of cumulative death (i.e. mortality) for all causes and for specific causes.|Necessity of invasive assisted ventilation|Necessity of non-invasive assisted ventilation|Intensive care unit admission|Post-anesthesia care unit admission|Hospital admission|Medical consultation|Home care and isolation time|Bed rest time|symptoms' duration (i.e. cough, fever, nasal congestion, gastrointestinal…	M	P	H
NCT04336410	Safety, Tolerability and Immunogenicity of INO-4800 for COVID-19 in Healthy Volunteers	Percentage of Participants with Adverse Events (AEs)|Percentage of Participants with Administration (Injection) Site Reactions|Percentage of Participants with Adverse Events of Special Interest (AESIs)|Change from Baseline in Antigen-Specific Binding Antibody Titers|Change from Baseline in Antigen-Specific Interferon-Gamma (IFN-γ) Cellular Immune Response	C	P	T
NCT04275414	Bevacizumab in Severe or Critical Patients With COVID-19 Pneumonia	Partial arterial oxygen pressure (PaO2) to fraction of inspiration O2 (FiO2) ratio|Degree of dyspnea (Liker scale)|Degree of dyspnea (VAS)|The area of lung lesions on Chest CT|The degree of lung exudation on Chest CT|SpO2|PaO2|CRP|hs-CRP|All-cause mortality	C	Q	S
NCT04338828	Nitric Oxide Inhalation Therapy for COVID-19 Infections in the ED	Rates of return visits to the ED|Inpatient hospitalizations required|Rates of intubation|Rates of mortality	O	P	S
NCT04332380	Convalescent Plasma for Patients With COVID-19: A Pilot Study	Change in Viral Load|Change in Immunoglobulin M COVID-19 antibodies Titers|Change in Immunoglobulin G COVID-19 antibodies Titers|Intensive Care Unit Admission|Length of Intensive Care Unit stay|Length of hospital stay (days)|Requirement of mechanical ventilation|Duration (days) of mechanical ventilation|Clinical status assessed according to the World Health Organization guideline|Mortality	V	Q	S
NCT04335305	Checkpoint Blockade in COVID-19 Pandemic	Percentage of patients with normalization of SpO2 ≥96%|Proportion of patients with temperature < 37,5 °C armpit.|Proportion of patients discharged from the emergency department and classified as low risk|Change from baseline in organ failure parameters|Proportion of mortality rate|Analysis of the remission of respiratory symptoms|Evaluation of the radiological response|Time to first negative in S…	C	P	S
NCT04273321	Efficacy and Safety of Corticosteroids in COVID-19	the incidence of treatment failure in 14 days|clinical cure incidence in 14 days|the duration of virus change to negative|mortality at day 30|ICU admission rate in 30 days	M	P	H
NCT04338360	Expanded Access to Convalescent Plasma for the Treatment of Patients With COVID-19		NA	NA	NA
NCT04328129	Household Transmission Investigation Study for COVID-19 in French Guiana	Evaluation of the extent of the virus transmission within households|Characterization of the secondary cases	C	Q	P
NCT04322123	Safety and Efficacy of Hydroxychloroquine Associated With Azythromycin in SARS-Cov-2 Virus	Evaluation of the clinical status|Ordinal scale in 7 days|Need of intubation and mechanical ventilation|Use of mechanical ventilation during hospital stay|Use of non-invasive ventilation|Hospital Length of Stay|All-cause mortality|Thromboembolic complications|Acute renal disfunction|Presence of virus at day 10 in subset of 180 patients	W	Q	H
NCT04339426	Atovaquone and Azithromycin Combination for Confirmed COVID-19 Infection	Virology Cure Rate|Safety and Tolerability of combination therapy|Cardiac Toxicity	V	P	S
NCT04331665	Study of the Efficacy and Safety of Ruxolitinib to Treat COVID-19 Pneumonia	Proportion of patients with COVID-19 pneumonia who become critically ill (defined as requiring mechanical ventilation and/or FiO2 of 60% of more)|All cause mortality rate|Average duration of hospital stay|Number of occurrence of secondary infections	M	P	H
NCT04327206	BCG Vaccination to Protect Healthcare Workers Against COVID-19	COVID-19 disease incidence|Severe COVID-19 disease incidence|COVID-19 incidence by 12 months|Severe COVID-19 incidence by 12 months|Time to first symptom of COVID-19|Episodes of COVID-19|Asymptomatic SARS-CoV-2 infection|Work absenteeism due to COVID-19|Bed confinement due to COVID-19|Symptom duration of COVID-19|SARS-CoV-2 pneumonia|Oxygen therapy with SARS-CoV-2|Critical care admissions with SA…	V	P	P
NCT04332835	Convalescent Plasma for Patients With COVID-19: A Randomized, Open Label, Parallel, Controlled Clinical Study	Change in Viral Load|Change in Immunoglobulin M COVID-19 Titers|Change in Immunoglobulin G COVID-19 Titers|Intensive Care Unit Admission|Length of Intensive Care Unit stay|Length of hospital stay (days)|Requirement of mechanical ventilation|Duration (days) of mechanical ventilation|Clinical status assessed according to the World Health Organization guideline|Mortality	V	Q	S
NCT04336774	CAPTION AI to Minimize Risk of COVID Exposure	Percent of patient echos that are not interpretable|Percent of patient echos that provide an automated (AI) LVEF (left ventricular ejection fraction)|Time to acquire images as measured by time stamps|Percent of agreement between AI calculate LVEF and LVEF read by physician	R	P	S
NCT04312009	Losartan for Patients With COVID-19 Requiring Hospitalization	Sequential Organ Failure Assessment (SOFA) Respiratory Score|28-Day Mortality|90-Day Mortality|Respiratory Failure Requiring Mechanical Ventilation|Number of 28-Day Ventilator-Free Days|Length of Hospital Stay|ICU Admission|ICU Length of Stay|Acute Kidney Injury|Hypotension Requiring Vasopressors|Sequential Organ Failure Assessment (SOFA) Total Score|Severity Assessment|Incidence of Respiratory F…	C	Q	S
NCT04328272	Effectiveness of Hydroxychloroquine in Covid-19 Patients	National Early Warning Score equal to zero|C-reactive proteins|Lymphocyte Count|d-dimers	C	P	S
NCT04311177	Losartan for Patients With COVID-19 Not Requiring Hospitalization	Hospital Admission|Change in PROMIS Dyspnea Functional Limitations|Change in PROMIS Dyspnea Severity|Fever Incidence Day 3|Fever Incidence Day 5|Fever Incidence Day 7|Fever Incidence Day 10|Severity of Symptoms upon Hospital Admission	C	P	S
NCT04330495	Randomized, Controlled, Double-blind Clinical Trial Comparing the Efficacy and Safety of Chemoprophylaxis With Hydroxychloroquine in Patients Under Biological Treatment and / or JAK Inhibitors in the Prevention of SARS-CoV-2 Infection	Incidence rate of new COVID-19 cases in both arms|Prevalence of COVID-19 cases in both arms|Mortality rate secondary to COVID-19 cases in both groups|Intensive Care Unit (CU) admission rate secondary to COVID-19 cases in both groups|Adverse events	C	P	P
NCT04280705	Adaptive COVID-19 Treatment Trial (ACTT)	Percentage of subjects reporting each severity rating on an 8-point ordinal scale|Change from baseline in alanine transaminase (ALT)|Change from baseline in aspartate transaminase (AST)|Change from baseline in creatinine|Change from baseline in glucose|Change from baseline in hemoglobin|Change from baseline in platelets|Change from baseline in prothrombin time (PT)|Change from baseline in total b…	W	Q	H
NCT04333654	Hydroxychloroquine in Outpatient Adults With COVID-19	Change from baseline to Day 3 in nasopharyngeal SARS-CoV-2 viral load (if quantitative PCR is available)|Number of participants by PCR result status (positive or negative) (if quantitative PCR is not available)|Change from baseline to Day 5 in nasopharyngeal SARS-CoV-2 viral load|Number of participants by PCR result status (positive or negative)|Number of participants with COVID-19 symptoms by se…	V	Q	S
NCT04321928	Personalized Health Education Against the Health Damage of Novel Coronavirus (COVID-19) Outbreak in Hungary	Primary composite rate of intensive care unit (ICU) admission, 48 hours of hospital admission, death in COVID-19 positive cases|The number of general practitioner visits|The number of emergency, hospital admission and intensive care admission|Length of hospitalization and intensive care unit stay|Organ dysfunction|Lifestyle changes|The cost of care	M	P	H
NCT04326452	Treating COVID-19 With a Bidirectional Oxygenation Valve	Pulse oximetry level|Respiratory rate|Heart rate|Blood pressure|Systemic carbon dioxide	L	Q	S
NCT04332666	Angiotensin-(1,7) Treatment in COVID-19: the ATCO Trial	ventilator free days|ICU free days|Hospital length of stay|Time to wean from mechanical ventilation|PaO2/FiO2 changes during drug administration|Deep vein thrombosis incidence|Changes in inflammatory markers|RAS effectors levels|Radiological findings	C	Q	S
NCT04324463	Anti-Coronavirus Therapies to Prevent Progression of Coronavirus Disease 2019 (COVID-19) Trial	Outpatients: Hospital Admission or Death|Inpatients: Invasive mechanical ventilation or mortality	M	P	H
NCT04334967	Hydroxychloroquine in Patients With Newly Diagnosed COVID-19 Compared to Standard of Care	Total Hospitalization|Total Mechanical Ventilation|Fever intensity measure|Shortness of breath measure|Changes in daytime cough measure|Changes in nighttime cough measure|Total mortality	C	P	S
NCT04320238	Experimental Trial of rhIFNα Nasal Drops to Prevent 2019-nCOV in Medical Staff	new-onset COVID-19|Number of Participants with coronavirus related symptoms|Number of Participants with adverse effect	C	P	P
NCT04332991	Outcomes Related to COVID-19 Treated With Hydroxychloroquine Among In-patients With Symptomatic Disease	COVID Ordinal Outcomes Scale on Day 15|all-location, all-cause mortality assessed on day 15|all-location, all-cause mortality assessed on day 29|COVID Ordinal Outcomes Scale on Study Day 3|COVID Ordinal Outcomes Scale on Study Day 8|COVID Ordinal Outcomes Scale on Study Day 29|Number of patients dead or with receipt of ECMO between enrollment and Day 28|Oxygen-free days through Day 28|Ventilator-…	W	Q	H
NCT04327388	Sarilumab COVID-19	Phase 2: Time to resolution of fever for at least 48 hours without antipyretics or until discharge, whichever is sooner|Phase 3: The percentage of patients reporting each severity rating on the 7-point ordinal scale|Phase 2: The time to improvement in oxygenation|Phase 2: Mean change in 7-point ordinal scale from baseline to Day 15|Phase 2: Clinical status using the 7-point ordinal scale at Day 1…	C	T	S
NCT04321174	COVID-19 Ring-based Prevention Trial With Lopinavir/Ritonavir	Microbiologic evidence of infection|Adverse events|Symptomatic COVID-19 disease|Seropositivity|Days of hospitalization attributable to COVID-19 disease|Respiratory failure requiring ventilatory support attributable to COVID-19 disease|Mortality|Short-term psychological impact of exposure to COVID-19 disease|Long-term psychological impact of exposure to COVID-19 disease|Health-related quality of l…	L	P	S
NCT04324073	Cohort Multiple Randomized Controlled Trials Open-label of Immune Modulatory Drugs and Other Treatments in COVID-19 Patients - Sarilumab Trial - CORIMUNO-19 - SARI	Survival without needs of ventilator utilization at day 14.|WHO progression scale <=5 at day 4|Cumulative incidence of successful tracheal extubation (defined as duration extubation > 48h) at day 14|WHO progression scale <=7 at day 4|WHO progression scale|Survival|28-day ventilator free-days|respiratory acidosis at day 4|PaO2/FiO2 ratio|time to oxygen supply independency|duration of hospitalizati…	M	P	H
NCT04338009	Elimination or Prolongation of ACE Inhibitors and ARB in Coronavirus Disease 2019	Hierarchical composite endpoint|All-Cause Death|Length of Hospital Stay|Length of ICU Stay, invasive mechanical ventilation or extracorporeal membrane oxygenation|AUC SOFA	M	P	H
NCT04281693	A New Screening Strategy for 2019 Novel Coronavirus Infection	Screening accuracy|Cost-effectiveness analysis	V	P	P
NCT04283461	Safety and Immunogenicity Study of 2019-nCoV Vaccine (mRNA-1273) for Prophylaxis SARS CoV-2 Infection	Frequency of solicited local reactogenicity adverse events (AEs)|Frequency of any medically-attended adverse events (MAAEs)|Frequency of any new-onset chronic medical conditions (NOCMCs)|Frequency of any serious adverse events (SAEs)|Frequency of any unsolicited adverse events (AEs)|Frequency of solicited systemic reactogenicity adverse events (AEs)|Grade of any unsolicited adverse events (AEs)|G…	C	P	T
NCT04324190	DIgital Online SuPport for COVID-19 StrEss	Change in Short-Form-36 (SF-36) Health Survey - Mental Health Component Summary score|Short-Form-36 (SF-36) Health Survey - Mental Health Component Summary score|Chronic stress items (9 items)|Generalized Anxiety Disorder Scale (GAD-7)|Patient Health Questionnaire (PHQ8)|Somatic Symptom Disorder (SSD-12)|Somatic Symptom Scale (SSS-8)|Allgemeine Selbstwirksamkeit Kurzskala (ASKU)|Screening Tool fo…	C	P	S
NCT04338958	Ruxolitinib in Covid-19 Patients With Defined Hyperinflammation	overall response rate in reversal of hyperinflammation|efficacy of ruxolitinib + standard-of-care (SoC)	C	P	S
NCT04299724	Safety and Immunity of Covid-19 aAPC Vaccine	Frequency of vaccine events|Frequency of serious vaccine events|Proportion of subjects with positive T cell response|28-day mortality|Duration of mechanical ventilation if applicable|Proportion of patients in each category of the 7-point scale|Proportion of patients with normalized inflammation factors|Clinical improvement based on the 7-point scale if applicable|Lower Murray lung injury score if…	C	P	P
NCT04338126	Tranexamic Acid (TXA) and Corona Virus 2019 (COVID19) in Inpatients	Admission to Intensive Care Unit	C	P	S
NCT04326790	The GReek Study in the Effects of Colchicine in Covid-19 cOmplications Prevention	CRP increase to 3 x upper limit of normal|Clinical deterioration in the semiquantitative ordinal scale suggested by the WHO R&D committee|Maximal concentration of cardiac troponin	L	Q	S
NCT04335097	Sensor Based Vital Signs Monitoring of Covid 19 Patients During Home Isolation	Stop home isolation|NEWS score|Clinic at hospitalization|Symptoms developed|Relative/peers evaluation of the patient|Serious of symptoms at admittance hospital	NA	NA	NA
NCT04303507	Chloroquine/ Hydroxychloroquine Prevention of Coronavirus Disease (COVID-19) in the Healthcare Setting	Number of symptomatic COVID-19 infections|Symptoms severity of COVID-19|Number of asymptomatic cases of COVID-19|Number of symptomatic acute respiratory illnesses|Severity of symptomatic acute respiratory illnesses	V	P	S
NCT04334850	Use of a Respiratory Multiplex PCR and Procalcitonin to Reduce Antibiotics Exposure in Patients With Severe Confirmed COVID-19 Pneumonia	Number of antibiotic free days|Mortality rates|Number of defined daily dose (DDD) per 100 patient-days of broad- and narrow-spectrum antibiotics.|Antibiotics duration at D28|Number of organ-failure free days (based on SOFA)|Incidence rates of bacterial super-infections|Incidence rates of colonization/infection with multidrug resistant bacteria and Clostridium difficile infections|ICU and hospital…	C	Q	S
NCT04337918	Nitric Oxide Releasing Solutions to Prevent and Treat Mild/Moderate COVID-19 Infection	Prevention Study: Measure the effect of NORS on the prevention of COVID-19 infection among health care professionals at risk of exposure to COVID-19|Treatment Sub Study: Measure the efficacy of NORS at reducing the progression of COVID- 19|Prevention Study: Measure the effect of NORS on the prevention of progression of COVID- 19|Prevention Study: Measure the tolerability of NORS treatments|Treatm…	V	P	P
NCT04276896	Immunity and Safety of Covid-19 Synthetic Minigene Vaccine	Clinical improvement based on the 7-point scale|Lower Murray lung injury score|28-day mortality|Duration of mechanical ventilation|Duration of hospitalization|Proportion of patients with negative RT-PCR results|Proportion of patients in each category of the 7-point scale|Proportion of patients with normalized inflammation factors|Frequency of vaccine/CTL Events|Frequency of Serious vaccine/CTL Ev…	W	Q	H
NCT04326426	ODYSSEY: A Study to Investigate the Efficacy of Tradipitant in Treating Severe or Critical COVID-19 Infection	Proportion of participants with normalization of fever and oxygen saturation by day 14|Treatment and prevention of inflammatory lung injury as measured by change in baseline of interleukin-6 (IL-6)|Rate of Decline of COVID-19 viral load assessed by RT-PCR from nasopharyngeal samples|In-hospital mortality|Mean change in NEWS2 score from baseline|Understand the effect of genetics for treatment resp…	C	P	S
NCT04322565	Colchicine Efficacy in COVID-19 Pneumonia	Clinical improvement|Hospital discharge|Death|Clinical status|Mechanical venhtilation|Hospitalization|Time from death|Negativization COVID 19|Fever	C	Q	S
NCT04323514	Use of Ascorbic Acid in Patients With COVID 19	In-hospital mortality|PCR levels|Lactate clearance|Hospital stay|Symptoms|Positive swab|Tomography imaging	M	P	H
NCT04324528	Cytokine Adsorption in Severe COVID-19 Pneumonia Requiring Extracorporeal Membrane Oxygenation	interleukin-6 (IL-6) level after 72 hours|30-day-survival|vasopressor dosage|fluid balance|lactate	L	Q	S
NCT04273763	Evaluating the Efficacy and Safety of Bromhexine Hydrochloride Tablets Combined With Standard Treatment/ Standard Treatment in Patients With Suspected and Mild Novel Coronavirus Pneumonia (COVID-19)	Time to clinical recovery after treatment|Rate of aggravation|Clinical remission rate|Dynamic changes of oxygenation index|Time to cure|rate to cure|Time to defervescence|Time to cough remission|Time to dyspnea remission|Days of supplemental oxygenation|Rate of patients with requring supplemental oxygen|Rate of patients with mechanical ventilation|Time of negative COVID-19 nucleic acid results|Ra…	C	T	S
NCT04334629	LIBA Trial in COVID-19	Disease progression|Time to mechanical ventilation|Overall survival|Reduction in proportion of patients who require ventilation|Reduction in length of Critical Care stay|Reduction in length of Hospital stay|Modulation of serum pro- and anti-inflammatory cytokines|Reduction in duration of ventilation|Increase in ventilator-free days	C	Q	S
NCT04322344	Escin in Patients With Covid-19 Infection	Mortality rate|Clinical status evaluated in agreement with guidelines|The differences in oxygen intake methods|Time of hospitalization (days)|Time of hospitalization in intensive care units|Pulmonary function	M	P	H
NCT04312243	NO Prevention of COVID-19 for Healthcare Providers	COVID-19 diagnosis|Positive SARS-CoV-2 rt-PCR test	V	P	P
NCT04340050	COVID-19 Convalescent Plasma	Feasibility of performing study pathway consisting of consenting convalescent donors, harvesting convalescent plasma, application for FDA eIND and administering convalescent plasma to the patients|Type of respiratory support|Cardiac arrest|Transfer to ICU|ICU mortality|ICU length of stay|Hospital mortality|Hospital length of stay|Ventilator-free days|Overall survival (28-day mortality)	NA	NA	NA
NCT04313127	A Phase I Clinical Trial in 18-60 Adults	Safety indexes of adverse reactions|Safety indexes of adverse events|Safety indexes of SAE|Safety indexes of lab measures|Immunogencity indexes of GMT(ELISA)|Immunogencity indexes of GMT(pseudoviral neutralization test method)|Immunogencity indexes of seropositivity rates(ELISA)|Immunogencity indexes of seropositivity rates(pseudoviral neutralization test method)|Immunogencity indexes of GMI(ELIS…	C	P	T
NCT04336748	HCQ for Primary Prophylaxis Against COVID19 in Health-care Workers	Symptomatic or asymptomatic SARS-CoV-2 infection confirmed by PCR|Viral load during SARS-CoV-2 infection|Seroconversion during the study period|Incidence of any acute respiratory infection|Days of sick leave	V	P	P
NCT04327401	COVID-19-associated ARDS Treated With Dexamethasone: Alliance Covid-19 Brasil III	Ventilator-free days|Evaluation of the clinical status|All-cause mortality|Mechanical ventilation duration|Sequential Organ Failure Assessment (SOFA) Score	C	Q	S
NCT04324606	A Study of a Candidate COVID-19 Vaccine (COV001)	Assess efficacy of the candidate ChAdOx1 nCoV-19 against COVID-19: Number of virologically confirmed (PCR positive) symptomatic cases|Assess the safety of the candidate vaccine ChAdOx1 nCoV: Occurrence of serious adverse events (SAEs)|Assess the safety, tolerability and reactogenicity profile of the candidate vaccine ChAdOx1 nCoV: Occurrence of solicited local reactogenicity signs and symptoms|As…	V	P	S
NCT04333732	CROWN CORONATION: Chloroquine RepurpOsing to healthWorkers for Novel CORONAvirus mitigaTION	Symptomatic COVID-19|Peak severity of COVID-19 over the study period	C	P	S
NCT04293887	Efficacy and Safety of IFN-α2β in the Treatment of Novel Coronavirus Patients	The incidence of side effects|Time from patient enrollment to clinical remission|Proportion of patients with normal body|Proportion of patients without dyspnea|Proportion of patients without cough|Proportion|The negative conversion rate of new coronavirus nucleic acid|Frequency of serious adverse drug events.	C	P	T
NCT04311697	Intravenous Aviptadil for COVID-19 Associated Acute Respiratory Distress	Mortality|PaO2:FiO2 ratio|TNF alpha|Multi-system organ failure free days	M	P	H
NCT04328467	Pre-exposure Prophylaxis for SARS-Coronavirus-2	COVID-19-free survival|Incidence of confirmed SARS-CoV-2 detection|Incidence of possible COVID-19 symptoms|Incidence of all-cause study medicine discontinuation|Ordinal Scale of COVID-19 Disease maximum severity if COVID-19 diagnosed at study end|Incidence of Hospitalization for COVID-19 or death|Incidence of study medication-related side effects	M	P	H
NCT04305457	Nitric Oxide Gas Inhalation Therapy for Mild/Moderate COVID-19	Reduction in the incidence of patients with mild/moderate COVID-19 requiring intubation and mechanical ventilation|Mortality|Time to clinical recovery	C	P	S
NCT04338698	Hydroxychloroquine, Oseltamivir and Azithromycin for the Treatment of COVID-19 Infection: An RCT	Laboratory Result|Clinical Outcome	L	Q	S
NCT04334265	Efficacy and Safety of Anluohuaxian in the Treatment of Rehabilitation Patients With Corona Virus Disease 2019	Changes in high-resolution computer tomography of the lung|Change in 6-minute walking distance|Changes in compound physiological index|Changes in the scores of the St. George's Hospital Respiratory Questionnaire|Changes in modified British Medical Research Council Dyspnea Scale (mMRC) scores|Changes in vital capacity of the lung	R	Q	S
NCT04334148	Healthcare Worker Exposure Response and Outcomes of Hydroxychloroquine	Number of participants testing positive for COVID-19 infection|Number of participants with COVID-19 viral shedding|Safety as measured by number of adverse events	V	P	S
NCT04333589	A Prospective Study on Corona Virus Disease 2019 Patients Whose Nucleic Acids Changed From Negative to Positive	Viral nucleic acid test negative conversion rate|Clinical cure rate	V	P	S
NCT04328480	The ECLA PHRI COLCOVID Trial	All-cause mortality|Composite outcome:composite of intubation for mechanical ventilation or death.	M	P	H
NCT04310228	Favipiravir Combined With Tocilizumab in the Treatment of Corona Virus Disease 2019	Clinical cure rate|Viral nucleic acid test negative conversion rate and days from positive to negative|Duration of fever|Lung imaging improvement time|Mortality rate because of Corona Virus Disease 2019|Rate of non-invasive or invasive mechanical ventilation when respiratory failure occurs|Mean in-hospital time	C	P	S
NCT04302519	Novel Coronavirus Induced Severe Pneumonia Treated by Dental Pulp Mesenchymal Stem Cells	Disppear time of ground-glass shadow in the lungs|Absorption of Lung shadow absorption by CT Scan-Chest|Changes of blood oxygen	R	T	S
NCT04331054	Protective Role of Inhaled Steroids for Covid-19 Infection	Time (in days) to clinical improvement within 30 days after randomization|Mortality rate at D30|Time (in days) from randomization to death|Number of days alive outside ICU within 30 days|Number of days alive free of invasive or non-invasive ventilation within 30 days|Number of days alive with oxygen therapy within 30 days|Maximal oxygen rate within 30 days|Difference between PaO2/FiO2 ratio at ra…	C	T	S
NCT04285190	The Effect of T89 on Improving Oxygen Saturation and Clinical Symptoms in Patients With COVID-19	The time to oxygen saturation recovery to normal level (≥97%)|The proportion of patients with normal level of oxygen saturation(≥97%)|The degree of remission of symptoms of patients, including: fatigue, nausea, vomiting, chest tightness, shortness of breath, etc.|The time to the myocardial enzyme spectrum recovery to normal after treatment|The proportion of the patients with normal myocardial enz…	L	T	S
NCT04316377	Norwegian Coronavirus Disease 2019 Study	Rate of decline in SARS-CoV-2 viral load|Change in National Early Warning Score score|Admission to intensive care unit|In-hospital mortality|Duration of hospital admission|Mortality at 30 and 90 days|Clinical status	V	T	S
NCT04326036	Use of cSVF Via IV Deployment for Residual Lung Damage After Symptomatic COVID-19 Infection	Incidence of Treatment-Emergent Adverse Events|Pulmonary Function Analysis|Digital Oximetry	C	P	T
NCT04261907	Evaluating and Comparing the Safety and Efficiency of ASC09/Ritonavir and Lopinavir/Ritonavir for Novel Coronavirus Infection	The incidence of composite adverse outcome|Time to recovery|Rate of no fever|Rate of no cough|Rate of no dyspnea|Rate of no requring supplemental oxygen|Rate of undectable viral RNA|Rate of mechanical ventilation|Rate of ICU admission|Time and rate of laboratory indicators related to disease improvement to return to normal	C	P	S
NCT04278963	Yinhu Qingwen Decoction for the Treatment of Mild / Common CoVID-19	Mean clinical recovery time (hours)|Time to CoVID-19 RT-PCR negative in upper respiratory tract specimen|Change (reduction) in CoVID-19 viral load in upper respiratory tract specimen as assessed by area under viral load curve.|Time to defervescence (in those with fever at enrolment)|Time to cough reported as mild or absent (in those with cough at enrolment rated severe or moderate)|Time to dyspne…	C	T	S
NCT04331613	Safety and Efficacy of CAStem for Severe COVID-19 Associated With/Without ARDS	Adverse reaction (AE) and severe adverse reaction (SAE)|Changes of lung imaging examinations|Time to SARS-CoV-2 RT-PCR negative|Duration of fever (Celsius)|Changes of blood oxygen (%)|Rate of all-cause mortality within 28 days|Lymphocyte count (*10^9/L)|Alanine aminotransferase (U/L)|Creatinine (umol/L)|Creatine kinase (U/L)|C-reactive protein (mg/L)|Procalcitonin (ng/L)|Lactate (mmol/L)|IL-1beta…	C	P	T
NCT04252118	Mesenchymal Stem Cell Treatment for Pneumonia Patients Infected With 2019 Novel Coronavirus	Size of lesion area by chest radiograph or CT|Side effects in the MSCs treatment group|Improvement of Clinical symptoms including duration of fever and respiratory|Time of nucleic acid turning negative|Rate of mortality within 28-days|CD4+ and CD8+ T celll count|Alanine aminotransferase|C-reactive protein|Creatine kinase	R	Q	S
NCT04338568	Screening COVID by Point-of-care Lung Ultrasound: a Validation Study	Accuracy of the diagnosis of interstitial syndrome by lung ultrasound|Inter-observer variability	R	Q	S
NCT04252885	The Efficacy of Lopinavir Plus Ritonavir and Arbidol Against Novel Coronavirus Infection	The rate of virus inhibition|The disease prorogation-temperature|The disease prorogation-respiratory function 1|The disease prorogation-respiratory function 2|The disease prorogation-respiratory function 3	V	Q	S
NCT04310865	Yinhu Qingwen Granula for the Treatment of Severe CoVID-19	changes in the ratio of PaO2 to FiO2 from baseline|PaO2|blood oxygen saturation (SpO2)|clinical status rating on the 7-point ordinal scale|Time to Clinical Improvement (TTCI)|Duration (hours) of non-invasive mechanical ventilation or high-flow nasal catheter oxygen inhalation use|Duration (hours) of invasive mechanical ventilation use|Duration (hours) of extracorporeal membrane oxygenation (ECMO)…	L	Q	S
NCT04273646	Study of Human Umbilical Cord Mesenchymal Stem Cells in the Treatment of Novel Coronavirus Severe Pneumonia	Pneumonia severity index|Oxygenation index (PaO2/FiO2)|Side effects in the UC-MSCs treatment group|28-days survival|Sequential organ failure assessment|C-reactive protein|Procalcitonin|Lymphocyte count|CD3+, CD4+ and CD8+ T celll count|CD4+/CD8+ratio	C	Q	S
NCT04322396	Proactive Prophylaxis With Azithromycin and Chloroquine in Hospitalized Patients With COVID-19	Number of days alive and discharged from hospital within 14 days|Categorization of hospitalization status|Admitted to intensive care unit, if admitted to ICU then length of stay|Have used Non-invasive ventilation (NIV) during hospitalization|Mortality|Length of hospitalization|Days alive and discharged from hospital|Number of readmissions (all causes)|Number of days using non-invasive ventilation…	C	P	S
NCT04319445	Mindfulness During COVID-19	Helpfulness of the session|Platform effectiveness|Change in Anxiety Level|Change in Stress Level|Value of the session|Satisfaction with the session|Percentage of participants that showed interest in a future session|Percentage of participants that would recommend this session to a family member|Percentage of participants by session frequency preference	O	O	O
NCT04291729	Evaluation of Ganovo （Danoprevir ） Combined With Ritonavir in the Treatment of Novel Coronavirus Infection	Rate of composite adverse outcomes|Time to recovery|Rate of no fever|Rate of no cough|Rate of no dyspnea|Rate of no requiring supplemental oxygen|Rate of undetectable New coronavirus pathogen nucleic acid|Rate of mechanical ventilation|Rate of ICU admission|Rate of serious adverse event	C	P	H
NCT04308668	Post-exposure Prophylaxis / Preemptive Therapy for SARS-Coronavirus-2	Incidence of COVID19 Disease among those who are asymptomatic at trial entry|Ordinal Scale of COVID19 Disease Severity at 14 days among those who are symptomatic at trial entry|Incidence of Hospitalization|Incidence of Death|Incidence of Confirmed SARS-CoV-2 Detection|Incidence of Symptoms Compatible with COVID19 (possible disease)|Incidence of All-Cause Study Medicine Discontinuation or Withdraw…	C	P	S
NCT04322773	Anti-il6 Treatment of Serious COVID-19 Disease With Threatening Respiratory Failure	Time to independence from supplementary oxygen therapy|Number of deaths|Days out of hospital and alive|Ventilator free days alive and out of hospital|C-reactive protein (CRP) level|Number of participants with serious adverse events	C	P	S
NCT04276688	Lopinavir/ Ritonavir, Ribavirin and IFN-beta Combination for nCoV Treatment	Time to negative NPS|Time to negative saliva|Time to clinical improvement|Hospitalisation|Mortality|Immune reaction|Adverse events|Time to negative all clinical specimens	V	T	S
NCT04298060	DAS181 for Patients With Severe Hospitalized Flu and SAD-RVs (COVID-19)	Percent of subjects who have returned to room air|Percent change of subjects return to baseline oxygen requirement	C	P	S
NCT04331808	CORIMUNO-19 - Tocilizumab Trial - TOCI (CORIMUNO-TOCI)	Survival without needs of ventilator utilization at day 14.|WHO progression scale <=5 at day 4|Cumulative incidence of successful tracheal extubation (defined as duration extubation > 48h) at day 14|WHO progression scale at day 4|WHO progression scale|Survival|28-day ventilator free-days|respiratory acidosis at day 4|PaO2/FiO2 ratio|time to oxygen supply independency|duration of hospitalization|t…	C	P	S
NCT04325906	Early PP With HFNC Versus HFNC in COVID-19 Induced Moderate to Severe ARDS	Treatment failure|Intubation rate|Efficacy of PP	C	P	S
NCT04337008	Renin Angiotesnin System - CoronaVirus	overactivity of the renin / aldosterone system	L	Q	S
NCT04296643	Medical Masks vs N95 Respirators for COVID-19	RT-PCR confirmed COVID-19 infection|Acute respiratory illness|Absenteeism|Lower respiratory infection|Pneumonia|ICU admission|Mechanical ventilation|Death	V	P	S
NCT04325893	Hydroxychloroquine Versus Placebo in COVID-19 Patients at Risk for Severe Disease	Number of death from any cause, or the need for intubation and mechanical ventilation during the 14 days following inclusion and start of treatment.|Number of death from any cause, or the need for intubation and mechanical ventilation during the 28 days following inclusion and start of treatment.|Clinical evolution on the WHO Ordinal Scale for Clinical Improvement for COVID-19 between day 0 and d…	M	P	H
NCT04330300	Coronavirus ACEi/ARB Investigation	Number of Covid-19 positive participants who die, require intubation in ICU, or require hospitalization for non-invasive ventilation (NIV)|Number of Covid-19 positive participants who die|Number of Covid-19 positive participants who require intubation in intensive care unit (ICU)|Number of Covid-19 positive participants who require hospitalization for non-invasive ventilation (NIV)|Number of SARS…	M	P	H
NCT04268537	Immunoregulatory Therapy for 2019-nCoV	lung injury score|absolute lymphocyte counts|serum level of CRP, PCT and IL-6|SOFA score|all cause mortality rate|ventilation free days|ICU free days	C	Q	S
NCT04340349	Low-dose Hydroxychloroquine and Bromhexine: a Novel Regimen for COVID-19 Prophylaxis in Healthcare Professionals	Polymerase chain reaction assay (PCR) negative at day 0 plus negative serological panel for COVID-19 antibodies at enrolment.|Polymerase chain reaction assay (PCR) negative at day 30.|Polymerase chain reaction assay (PCR) negative at day 60.	V	P	P
NCT04327505	Safety and Efficacy of Hyperbaric Oxygen for ARDS in Patients With COVID-19	PO2/FiO2 (Safety)|PO2/FiO2 (Efficacy)|Early Warning Score (NEWS) (Safety)|Early Warning Score (NEWS) (Efficacy)|Immunological response (Efficacy)|Mechanical ventilation (Efficacy)|SAE|Serious ADR|AE|Oxygen dose|Pulmonary CT (low-dose CT)|Chest X-ray|Chest ultrasound|Secondary infections|Mortality|ICU free days|ICU mortality|Hospital mortality|Micro RNA plasma (Biomarker)|MicroRNA/RNA PBMC (Explan…	C	P	T
NCT04261426	The Efficacy of Intravenous Immunoglobulin Therapy for Severe 2019-nCoV Infected Pneumonia	Clinical improvement based on the 7-point scale|Lower Murray lung injury score|28-day mortality|Duration of mechanical ventilation|Duration of hospitalization|Proportion of patients with negative RT-PCR results|Proportion of patients in each category of the 7-point scale|Proportion of patients with normalized inflammation factors|Frequency of Adverse Drug Events|Frequency of Serious Adverse Drug …	W	Q	H
NCT04255017	A Prospective/Retrospective,Randomized Controlled Clinical Study of Antiviral Therapy in the 2019-nCoV Pneumonia	Rate of disease remission|Time for lung recovery|Rate of no fever|Rate of respiratory symptom remission|Rate of lung imaging recovery|Rate of CRP,ES,Biochemical criterion(CK,ALT,Mb) recovery|Rate of undetectable viral RNA	C	P	S
NCT04254874	A Prospective/Retrospective,Randomized Controlled Clinical Study of Interferon Atomization in the 2019-nCoV Pneumonia	Rate of disease remission|Time for lung recovery|Rate of no fever|Rate of respiratory symptom remission|Rate of lung imaging recovery|Rate of CRP,ES,Biochemical criterion (CK,ALT,Mb)recovery|Rate of undetectable viral RNA	C	P	S
NCT04334434	Telerehabilitation in Individuals Over 65 Years of Age Having Social Isolation Due to Coronavirus (Covid-19)	Physical Activity Scale for the Elderly|Nottingham Health Profile|Loneliness Scale for the Elderly	C	Q	O
NCT04261270	A Randomized,Open,Controlled Clinical Study to Evaluate the Efficacy of ASC09F and Ritonavir for 2019-nCoV Pneumonia	Rate of comprehensive adverse outcome|Time of clinical remission|Rate of no fever|Rate of no cough|Rate of no dyspnea|Rate of no need for oxygen inhalation|Rate of undetectable viral RNA|Rate of mechanical ventilation|Rate of ICU admission|Rate and time of CRP,ES,Biochemical criterion(CK,ALT,Mb)recovery	C	P	S
NCT04263402	The Efficacy of Different Hormone Doses in 2019-nCoV Severe Pneumonia	Rate of disease remission|Rate and time of entering the critical stage|Rate of normal tempreture|Rate of respiratory symptom remission|Rate of lung imaging recovery|Rate of laboratory indicator recovery|Rate of undetectable viral RNA	C	P	S
NCT04320277	Baricitinib in Symptomatic Patients Infected by COVID-19: an Open-label, Pilot Study.	The percentage of patients requiring transfer to ICU as compared with the rate of transfers observed in controls.|The percentage of patients achieving the remission; CRP, IL-6 and TNFα values at baseline and during the treatment course; the number of AEs.	C	P	S
NCT04325867	Integrated Distance Management Strategy for Patients With Cardiovascular Diseases in the Context of COVID-19	Providing a special electronic platform (e-health) for remote managing cardiovascular outpatients|Number of patients included in this platform|Number of consultations/sessions given	O	O	O
NCT04288713	Eculizumab (Soliris) in Covid-19 Infected Patients		NA	NA	NA
NCT04329533	Effects of Using Mobile App on Perceived Stress During Coronavirus (COVID 19) Pandemic	Perceived Stress Scale|Hospital Anxiety and Depression Scale|PROMIS Sleep Disturbance Short Form Survey|Adherence|Participant Satisfaction|Coronavirus Questionnaire	C	Q	O
NCT04275388	Xiyanping Injection for the Treatment of New Coronavirus Infected Pneumonia	Clinical recovery time|Complete fever time|Cough relief time|Virus negative time|Incidence of severe or critical neocoronavirus pneumonia	C	T	S
NCT04279197	Treatment of Pulmonary Fibrosis Due to 2019-nCoV Pneumonia With Fuzheng Huayu	High-resolution computed tomography (HRCT) score|Lung function including FVC, FVC as a percentage of projected value and DLco|Times of acute exacerbation|Six-minute walk distance|Dyspnea Scores|Composite physiological index	R	Q	S
NCT04264858	Treatment of Acute Severe 2019-nCoV Pneumonia With Immunoglobulin From Cured Patients	Time to Clinical Improvement (TTCI)|Clinical status assessed by the ordinal scale|The differences in oxygen intake methods|Duration (days) of supplemental oxygenation|Duration (days) of mechanical ventilation|The mean PaO2/FiO2|The lesions of the pulmonary segment numbers involved in pulmonary CT [ every 7 days]|Time to 2019-nCoV RT-PCR negativity in respiratory tract specimens [every 3 days]|Dyn…	C	T	S
NCT04335279	Evaluation of the Scleroderma Patient-centered Intervention Network COVID-19 Home-isolation Activities Together Program	Anxiety: Patient-Reported Outcomes Measurement Information System (PROMIS) Anxiety 4a v1.0|Depression symptoms: Patient Health Questionnaire (PHQ-8)|Stress: Perceived Stress Scale (PSS)|Loneliness: University of California, Los Angeles (UCLA) Loneliness Scale (ULS-6)|Boredom: Multidimensional State Boredom Scale (MSBS-8)|Physical activity: International Physical Activity Questionnaire - modified …	C	Q	O
NCT04340414	Safety and Effectiveness of Low-flow ECMO Driving by CVVH Machine in Severe NCP	PaCO2|Driving Pressure|Tidal volume	L	Q	S
NCT04306055	Blood Donor Recruitment During Epidemic of COVID-19	Differences of attitude about blood donation towards different questionnaires|Rates of blood donation during 3 weeks	O	Q	O
NCT04338906	Combination Therapy With Camostat Mesilate + Hydroxychloroquine for COVID-19	Not hospitalized|Time to improvement of 2 categories from admission on a 7-point ordinal scale|Proportion of participants in each group with normalization of fever|Proportion of participants in each group with oxygen saturation > 94% on room air for >24h|Time to fever normalization (if febrile at baseline)|Time to first negative SARS-CoV-2 PCR in NP swap (if pos. at baseline)|Time to first negati…	C	P	S
NCT04326114	Effectiveness and Safety of Respiratory Training in the Prevention and Severity of COVID-19	COVID-19 disease diagnosis|COVID-19 disease symptoms severity|Adverse effects	V	P	P
NCT04302766	Expanded Access Remdesivir (RDV; GS-5734™)		NA	NA	NA
NCT04260594	Clinical Study of Arbidol Hydrochloride Tablets in the Treatment of Pneumonia Caused by Novel Coronavirus	Virus negative conversion rate in the first week|Virus negative conversion rate|Antipyretic rate|Symptom relief time|Finger oxygen improvement rate|Disease progression rate|Mortality rate|Incidence of severe adverse reactions|Change curve of peripheral blood lymphocyte count	V	P	S
NCT04244591	Glucocorticoid Therapy for Novel CoronavirusCritically Ill Patients With Severe Acute Respiratory Failure	Lower Murray lung injury score|The difference of PaO2/FiO2 between two groups|Lower Sequential Organ Failure Assessment (SOFA) score|Mechanical ventilation support|Clearance of noval coronavirus|All-cause mortality	C	Q	S
NCT04338802	Efficacy and Safety of Nintedanib in the Treatment of Pulmonary Fibrosis in Patients With Moderate to Severe COVID -19	Changes in forced vital capacity (FVC)|Changes in carbon monoxide dispersion (DLco%)|Changes in the six-minute walk test (6MWT)|Changes in High resolution CT score	C	Q	S
NCT04282902	A Study to Evaluate the Efficacy and Safety of Pirfenidone With Novel Coronavirus Infection	chest CT|Finger pulse oxygen|blood gas|K-BILD|death|Time to disease progression or death within 4 weeks|blood|viral nucleic acid|dyspnea score|cough scores	R	Q	S
NCT04333251	Study Testing Convalescent Plasma vs Best Supportive Care	reduction in oxygen and ventilation support	C	Q	S
NCT04252274	Efficacy and Safety of Darunavir and Cobicistat for Treatment of Pneumonia Caused by 2019-nCoV	The virological clearance rate of throat swabs, sputum, or lower respiratory tract secretions at day 7|The virological clearance rate of throat swabs, sputum, or lower respiratory tract secretions at day 3|The virological clearance rate of throat swabs, sputum, or lower respiratory tract secretions at day 5|Number of participants with treatment-related adverse events as assessed by CTCAE v5.0|The…	V	P	S
NCT04261517	Efficacy and Safety of Hydroxychloroquine for Treatment of Pneumonia Caused by 2019-nCoV ( HC-nCoV )	The virological clearance rate of throat swabs, sputum, or lower respiratory tract secretions at day 3|The virological clearance rate of throat swabs, sputum, or lower respiratory tract secretions at day 5|The virological clearance rate of throat swabs, sputum, or lower respiratory tract secretions at day 7|The mortality rate of subjects at weeks 2|Number of participants with treatment-related ad…	V	P	S
NCT04269525	Umbilical Cord(UC)-Derived Mesenchymal Stem Cells(MSCs) Treatment for the 2019-novel Coronavirus(nCOV) Pneumonia	Oxygenation index|28 day mortality|Hospital stay|2019-nCoV nucleic acid test|Improvement of lung imaging examinations|White blood cell count|Lymphocyte count|Lymphocyte percentage|Procalcitonin|interleukin(IL)-2|IL-4|IL-6|IL-8|IL-10|tumor necrosis factor(TNF)-α|γ-interferon(IFN)	L	Q	S
NCT04326075	Early CPAP in COVID Patients With Respiratory Failure.	Death or need of intubation|30-day mortality	M	P	H
NCT04264533	Vitamin C Infusion for the Treatment of Severe 2019-nCoV Infected Pneumonia	Ventilation-free days|28-days mortality|ICU length of stay|Demand for first aid measuments|Vasopressor days|Respiratory indexes|Ventilator parameters|APACHE II scores|SOFA scores	C	Q	S
NCT04251871	Treatment and Prevention of Traditional Chinese Medicines (TCMs) on 2019-nCoV Infection	Time to complete remission of 2019-nCoV infection-associated symptoms|The incidence of dyspnea with low oxygen saturation level and high respiratory rate|Number of subjects who develop complications of 2019-nCoV infection|Time to virus shedding|Time to improvement of abnormalities in Chest radiology|The evaluation of Traditional Chinese Medicine (TCM) symptoms before and after treatment	C	T	S
NCT04275245	Clinical Study of Anti-CD147 Humanized Meplazumab for Injection to Treat With 2019-nCoV Pneumonia	2019 nCoV nucleic acid detection|Recovery of body temperature|Recovery of resting respiratory rate|Recovery of SPO2|Chest CT / chest film changes|PaO2 / FiO2|Time to reach the isolation release standard|Changes of inflammatory immune status	V	P	S
NCT04280224	NK Cells Treatment for Novel Coronavirus Pneumonia	Improvement of clinical symptoms including duration of fever|Improvement of clinical symptoms including respiratory frequency|Number of participants with treatment-related adverse events evaluated with CTCAE,version 4.0|Time of virus nucleic acid test negative|CD4+ and CD8+ T cell count|Rate of mortality within 28-days|Size of lesion area by thoracic imaging	C	Q	S
NCT04335851	Video-Based Exercises and Well-Being During Social Isolation	World Health Organization Quality of Life Questionnaire Bref|Rapid Assessment of Physical Activity|Global Rating of Change Scale	O	Q	O
NCT04320056	Closed-Loop Oxygen to Verify That Healthcare Workers Interventions Decrease During Pneumonia	The number of interventions|Duration of interventions|Mean oxygen flow|Time within theSpO2 target|Time with hypoxemia|Time with hyperoxemia|Rate of ICU admission|Rate of needed non invasive respiratory support|Rate of intubation|NEWS 2 score evolution|EWSO2 score evolution|Cost-effectiveness|length of stay	C	P	S
NCT04276987	A Pilot Clinical Study on Inhalation of Mesenchymal Stem Cells Exosomes Treating Severe Novel Coronavirus Pneumonia	Adverse reaction (AE) and severe adverse reaction (SAE)|Time to clinical improvement (TTIC)|Number of patients weaning from mechanical ventilation|Duration (days) of ICU monitoring|Duration (days) of vasoactive agents usage|Duration (days) of mechanical ventilation supply|Number of patients with improved organ failure|Rate of mortality	C	P	T
NCT04319900	Clinical Trial of Favipiravir Tablets Combine With Chloroquine Phosphate in the Treatment of Novel Coronavirus Pneumonia	Time of Improvement or recovery of respiratory symptoms|Number of days virus nucleic acid shedding|Frequency of Improvement or recovery of respiratory symptoms|Duration of fever|Frequencies of progression to severe illness|Time of improvement of pulmonary imaging|Peripheral blood c-reactive protein concentration|Absolute value of peripheral blood lymphocytes|percentage of peripheral blood lymphoc…	C	T	S
NCT04246242	A Randomized Multicenter Controlled Clinical Trial of Arbidol in Patients With 2019 Novel Coronavirus (2019-nCoV)	mortality	M	P	H
ChiCTR2000029935	A Single-arm Clinical Trial for Chloroquine Phosphate in the treatment of Novel Coronavirus Pneumonia 2019 (COVID-19)	Length of hospital stay;	C	T	S
ChiCTR2000029941	A randomized controlled trial for Traditional Chinese Medicine in the treatment for Novel Coronavirus Pneumonia (COVID-19)	Number of worsening events;	C	P	S
ChiCTR2000029939	A Single-blind, Randomized, Controlled Clinical Trial for Chloroquine Phosphate in the treatment of Novel Coronavirus Pneumonia 2019 (COVID-19)	Length of hospital stay;	C	T	S
ChiCTR2000029947	A Randomized Controlled Trial for Qingyi No. 4 Compound in the treatment of Convalescence Patients of Novel Coronavirus Pneumonia (COVID-19)	Lung function;	C	Q	S
ChiCTR2000029850	Study on convalescent plasma treatment for severe patients with novel coronavirus pneumonia (COVID-19)	Fatality rate;	M	P	H
ChiCTR2000029814	Clinical Trial for Integrated Chinese and Western Medicine in the Treatment of Children with Novel Coronavirus Pneumonia (COVID-19)	Time fo fever reduction;Time of nucleic acid negative;Severe conversion rate;Improvement time of respiratory symptoms;	C	Q	S
ChiCTR2000029869	A multicenter, randomized, controlled trial for integrated Chinese and western medicine in the treatment of ordinary novel coronavirus pneumonia (COVID-19) based on the ' Internal and External Relieving -Truncated Torsion' strategy	14 day outcome of the subjects, including: recovery, improvement, turning critical, death.;lung CT;	M	P	H
ChiCTR2000029811	Clinical Study for Anti-aging Active Freeze-dried Powder Granules in the Treatment of Acute Novel Coronavirus Pneumonia (COVID-19)	Time to disease recovery;	C	P	S
ChiCTR2000029867	The efficacy and safety of carrimycin treatment in patients with novel coronavirus pneumonia (COVID-19): a multicenter, randomized, open-label, controlled trial	Body temperature returns to normal time;Pulmonary inflammation resolution time (HRCT);Mouthwash (pharyngeal swab) at the end of treatment COVID-19 RNA negative rate;	C	T	S
ChiCTR2000029849	Application of Regulating Intestinal Flora in the Treatment of Severe Novel Coronavirus Pneumonia (COVID-19)	Length of admission;mortality rate;	C	T	S
ChiCTR2000029855	A randomized, open and controlled clinical trial for traditional Chinese medicine in the treatment of novel coronavirus pneumonia (COVID-19)	TCM symptom score;Antifebrile time;The time and rate of transition of new coronavirus to Yin;	C	Q	S
ChiCTR2000029789	Randomized controlled trial for TCM syndrome differentiation treatment impacting quality of life of post-discharge patients with novel coronavirus pneumonia (COVID-19)	St. George's Respiratory Questionnaire;	C	Q	S
ChiCTR2000029822	A randomized controlled trial for honeysuckle decoction in the treatment of patients with novel coronavirus (COVID-19) infection	rate of cure;	C	P	S
ChiCTR2000029778	Clinical Study for Traditional Chinese Medicine Combined With Western Medicine in Treatment of Novel Coronavirus Pneumonia (COVID-19)	Length of hospital stay;fever clearance time;	C	T	S
ChiCTR2000029853	A randomized, open-label, controlled clinical trial for azvudine in the treatment of novel coronavirus pneumonia (COVID-19)	time and rate of temperature return to normal;;time and rate of improvement of respiratory symptoms and signs (lung rhones, cough, sputum, sore throat, etc.);time and rate of improvement of diarrhea, myalgia, fatigue and other symptoms;time and rate of pulmonary imaging improvement;time and rate of change to negative COVID-19 nucleic acid test;time and rate of improvement of oxygenation measureme…	C	T	S
ChiCTR2000029813	Clinical Trial for Tanreqing Capsules in the Treatment of Novel Coronavirus Pneumonia (COVID-19)	Time of viral nucleic acid turns negative;Antipyretic time;	V	T	S
ChiCTR2000029806	Immunomodulatory Therapy for Severe Novel Coronavirus Pneumonia (COVID-19)	Proportion of patients with a lung injury score reduction of 1-point or more 7 days after randomization;	C	P	S
ChiCTR2000029777	A multicenter, randomized, controlled trial for integrated chinese and western medicine in the treatment of novel coronavirus pneumonia (COVID-19) based on the 'Truncated Torsion' strategy	14 day outcome of the subjects, including: recovery, improvement, turning critical, death.;lung CT;	M	P	H
ChiCTR2000029776	A randomized, open-label, blank-controlled, multicenter trial for Polyinosinic-Polycytidylic Acid Injection in the treatment of novel coronavirus pneumonia (COVID-19)	Time to Clinical recovery;	C	T	S
ChiCTR2000029819	Ba-Bao-Dan in the adjuvant therapy of novel coronavirus pneumonia (COVID-19) patients	Clinical and laboratory indicators;Viral load;chest CT;serum cell factor;	L	Q	S
ChiCTR2000029790	Clinical study for the integration of traditional Chinese and western medicine in the treatment of novel coronavirus pneumonia (COVID-19)	TCM symptoms efficacy;	C	Q	S
ChiCTR2000029788	Traditional Chinese medicine cooperative therapy for patients with novel coronavirus pneumonia (COVID-19): a randomized controlled trial	Antipyretic time;Pharyngeal swab nucleic acid negative time;Blood gas analysis;Traditional Chinese medicine syndrome score;	C	T	S
ChiCTR2000029769	Babaodan Capsule used for the adjuvant treatment of severe novel coronavirus pneumonia (COVID-19)	28-day survival;Inflammatory factor levels;	M	P	H
ChiCTR2000029765	A multicenter, randomized controlled trial for the efficacy and safety of tocilizumab in the treatment of new coronavirus pneumonia (COVID-19)	cure rate;	C	P	S
ChiCTR2000029763	The efficacy of traditional chinese medicine on Novel Coronavirus Pneumonia (COVID-19) patients treated in square cabin hospital: a prospective, randomized controlled trial	Rate of conversion to severe or critical illness;	C	P	S
ChiCTR2000029656	A randomized, open-label study to evaluate the efficacy and safety of low-dose corticosteroids in hospitalized patients with novel coronavirus pneumonia (COVID-19)	ECG;Chest imaging;Complications;vital signs;NEWS2 score;	C	Q	S
ChiCTR2000029768	A randomized, open, controlled trial for diammonium glycyrrhizinate enteric-coated capsules combined with vitamin C tablets in the treatment of common novel coronavirus pneumonia (COVID-19) in the basic of clinical standard antiviral treatment to evaluate the safety and efficiency	Time to Clinical recovery;	C	T	S
ChiCTR2000029756	Clinical study of nebulized Xiyanping injection in the treatment of novel coronavirus pneumonia (COVID-19)	vital signs (Body temperature, blood pressure, heart rate, breathing rate);Respiratory symptoms and signs (Lung sounds, cough, sputum);Etiology and laboratory testing;PaO2/SPO2;Liquid balance;Ventilator condition;Imaging changes;	C	Q	S
ChiCTR2000029742	A randomized, parallel controlled trial for the efficacy and safety of Sodium Aescinate Injection in the treatment of patients with pneumonia (COVID-19)	Chest imaging (CT);	R	Q	S
ChiCTR2000029741	Efficacy of Chloroquine and Lopinavir/ Ritonavir in mild/general novel coronavirus (CoVID-19) infections: a prospective, open-label, multicenter randomized controlled clinical study	Length of stay;Length of severe;oxygenation index during treatment;all-cause mortality in 28 days;Peripheral blood cell count (including white blood cells, lymphocytes, neutrophils, etc.);procalcitonin;C-reactive protein;Inflammatory factors (including IL-6, IL-10, TNF-a, etc.);Lymphocyte subsets and complement;Coagulation indicators (prothrombin time, activated partial prothrombin time, fibrinog…	C	T	S
ChiCTR2000029747	Effect evaluation and prognosis of Chinese medicine based on Novel Coronavirus Pneumonia (COVID-19)	Chest CT;Routine blood test;liver and renal function;TCM syndrome;	R	Q	S
ChiCTR2000029739	A Multicenter, Randomized, Parallel Controlled Clinical Study of Hydrogen-Oxygen Nebulizer to Improve the Symptoms of Patients With Novel Coronavirus Pneumonia (COVID-19)	the condition worsens and develops into severe or critical condition;the condition improves significantly and reaches the discharge standard;The overall treatment time is no longer than 14 days;	C	NA	S
ChiCTR2000029639	Study for Mental health and psychological status of doctors, nurses and patients in novel coronavirus pneumonia (COVID-19) designated hospital and effect of interventions	Physical examination;Nucleic acid;Oxygenation index;GAD-7;PHQ-9;SASRQ;PSQI;Lymphocyte subsets;	C	NA	S
ChiCTR2000029636	Efficacy and safety of aerosol inhalation of vMIP in the treatment of novel coronavirus pneumonia (COVID-19): a single arm clinical trial	2019-nCoV nucleic acid turning negative time (from respiratory secretion), or the time to release isolation;	V	T	S
ChiCTR2000029621	Clinical study of arbidol hydrochloride tablets in the treatment of novel coronavirus pneumonia (COVID-19)	Virus negative conversion rate in the first week;	V	P	S
ChiCTR2000029601	Community based prevention and control for Chinese medicine in the treatment of novel coronavirus pneumonia (COVID-19) in the isolate suspected and confirmed population	the negative conversion ratio;the proportion of general patients with advanced severe disease;confirmed rate of suspected cases;	V	P	S
ChiCTR2000029569	Safety and efficacy of umbilical cord blood mononuclear cells conditioned medium in the treatment of severe and critically novel coronavirus pneumonia (COVID-19): a randomized controlled trial	PSI;	C	Q	S
ChiCTR2000029602	Clinical study for community based prevention and control strategy of novel coronavirus pneumonia (COVID-19) in the isolate suspected and confirmed population	Incidence of onset at home / designated isolation population who progressed to designated isolation treatment or were diagnosed with novel coronavirus-infected pneumonia;days of onset at home / designated isolation population who progressed to designated isolation treatment or were diagnosed with novel coronavirus-infected pneumonia;	O	P	P
ChiCTR2000029600	Clinical study for safety and efficacy of Favipiravir in the treatment of novel coronavirus pneumonia (COVID-19)	Declining speed of Novel Coronavirus by PCR;Negative Time of Novel Coronavirus by PCR;Incidentce rate of chest imaging;Incidence rate of liver enzymes;Incidence rate of kidney damage;	V	Q	S
ChiCTR2000029609	A prospective, open-label, multiple-center study for the efficacy of chloroquine phosphate in patients with novel coronavirus pneumonia (COVID-19)	virus nucleic acid negative-transforming time;	V	T	S
ChiCTR2000029606	Clinical Study for Human Menstrual Blood-Derived Stem Cells in the Treatment of Acute Novel Coronavirus Pneumonia (COVID-19)	Mortality in patients;	M	P	H
ChiCTR2000029542	Study for the efficacy of chloroquine in patients with novel coronavirus pneumonia (COVID-19)	viral negative-transforming time;30-day cause-specific mortality;	V	T	S
ChiCTR2000029539	A randomized, open-label study to evaluate the efficacy and safety of Lopinavir-Ritonavir in patients with mild novel coronavirus pneumonia (COVID-19)	The incidence of adverse outcome within 14 days after admission: Patients with conscious dyspnea, SpO2 = 94% or respiratory frequency = 24 times / min in the state of resting without oxygen inhalation;	C	P	T
ChiCTR2000029572	Safety and efficacy of umbilical cord blood mononuclear cells in the treatment of severe and critically novel coronavirus pneumonia(COVID-19): a randomized controlled clinical trial	PSI;	C	Q	S
ChiCTR2000029559	Therapeutic effect of hydroxychloroquine on novel coronavirus pneumonia (COVID-19)	The time when the nucleic acid of the novel coronavirus turns negative;T cell recovery time;	V	P	S
ChiCTR2000029605	A randomized, open-label, blank-controlled, multicenter trial for Shuang-Huang-Lian oral solution in the treatment of ovel coronavirus pneumonia (COVID-19)	Time to disease recovery;	C	T	S
ChiCTR2000029603	A Randomized, Open-Label, Multi-Centre Clinical Trial Evaluating and Comparing the Safety and Efficiency of ASC09/Ritonavir and Lopinavir/Ritonavir for Confirmed Cases of Novel Coronavirus Pneumonia (COVID-19)	The incidence of composite adverse outcome within 14 days after admission: Defined as (one of them) SPO2<= 93% without oxygen supplementation, PaO2/FiO2 <= 300mmHg or RR <=30 breaths per minute.;	C	P	S
ChiCTR2000029544	A randomized controlled trial for the efficacy and safety of Baloxavir Marboxil, Favipiravir tablets in novel coronavirus pneumonia (COVID-19) patients who are still positive on virus detection under the current antiviral therapy	Time to viral negativity by RT-PCR;Time to clinical improvement;	V	T	S
ChiCTR2000029541	A randomised, open, controlled trial for darunavir/cobicistat or Lopinavir/ritonavir combined with thymosin a1 in the treatment of novel coronavirus pneumonia (COVID-19)	Time to conversion of 2019-nCoV RNA result from RI sample;	V	T	S
ChiCTR2000029589	An open, prospective, multicenter clinical study for the efficacy and safety of Reduning injection in the treatment of ovel coronavirus pneumonia (COVID-19)	Antipyretic time;	C	T	S
ChiCTR2000029578	Chinese medicine prevention and treatment program for novel coronavirus pneumonia (COVID-19): a perspective, sing-arm trial	Cure rate;The cure time;The rate and time at which the normal type progresses to the heavy type;Rate and time of progression from heavy to critical type and even death;	C	P	S
ChiCTR2000029438	A randomized controlled trial of integrated TCM and Western Medicine in the treatment of severe novel coronavirus pneumonia (COVID-19)	CURB-65;PSI score;Mechanical ventilation time;Length of stay in hospital;	C	Q	S
ChiCTR2000029468	A real-world study for lopinavir/ritonavir (LPV/r) and emtritabine (FTC) / Tenofovir alafenamide Fumarate tablets (TAF) regimen in the treatment of novel coronavirus pneumonia (COVID-19)	Patient survival rate;	M	P	H
ChiCTR2000029558	Recommendations of Integrated Traditional Chinese and Western Medicine for Diagnosis and Treatment of Novel Coronavirus Pneumonia (COVID-19) in Sichuan Province	blood routine;urine routines;CRP;PCT;ESR;creatase;troponin;myoglobin;D-Dimer;arterial blood gas analysis;Nucleic acid test for 2019-nCoV ;chest CT;Biochemical complete set;	L	Q	S
ChiCTR2000029548	Randomized, open-label, controlled trial for evaluating of the efficacy and safety of Baloxavir Marboxil, Favipiravir, and Lopinavir-Ritonavir in the treatment of novel coronavirus pneumonia (COVID-19) patients	Time to viral negativityby RT-PCR;Time to clinical improvement: Time from start of study drug to hospital discharge or to NEWS2<2 for 24 hours.;	V	T	S
ChiCTR2000029518	Chinese medicine prevention and treatment program for novel coronavirus pneumonia (COVID-19): a perspective, double-blind, placebo, randomised controlled trial	Recovery time;Ratio and time for the general type to progress to heavy;Ratio and time of severe progression to critical or even death;	C	P	S
ChiCTR2000029517	Chinese medicine prevention and treatment program for suspected novel coronavirus pneumonia (COVID-19): a perspective, double-blind, placebo, randomised controlled trial	Relief of clinical symptoms and duration;	C	Q	S
ChiCTR2000029435	Randomized controlled trial for traditional Chinese medicine in the prevention of novel coronavirus pneumonia (COVID-19) in high risk population	Viral nucleic acid detection;CT Scan of the Lungs;Blood routine examination;Temperature;Height;Weight;	V	P	S
ChiCTR2000029461	A Randomized Controlled Trial for Integrated Traditional Chinese Medicine and Western Medicine in the Treatment of Common Type Novel Coronavirus Pneumonia (COVID-19)	pulmonary function;Antipyretic time;Time of virus turning negative;	C	Q	S
ChiCTR2000029460	The effect of shadowboxing for pulmonary function and quality of life in patients with novel coronavirus pneumonia (COVID-19) in rehabilitation period	pulmonary function;St Georges respiratory questionnaire, SGRQ;Modified Barthel Index, MBI;Incidence of adverse events;	C	Q	S
ChiCTR2000029436	A single arm study for evaluation of integrated traditional Chinese and western medicine in the treatment of novel coronavirus pneumonia (COVID-19)	Duration of PCR normalization;Clinical symptom score;	V	T	S
ChiCTR2000029418	Chinese Herbal medicine for Severe nevel coronavirus pneumonia (COVID-19): a Randomized Controlled Trial	Critically ill patients (%);	C	P	S
ChiCTR2000029495	Traditional Chinese Medicine, Psychological Intervention and Investigation of Mental Health for Patients With Novel Coronavirus Pneumonia (COVID-19) in Convalescent Period	Self-rating depression scale, SDS;Self-Rating Anxiety Scale, SAS;ocial support rate scale, SSRS;	O	Q	O
ChiCTR2000029493	Traditional Chinese Medicine for Pulmonary Fibrosis, Pulmonary Function and Quality of Life in Patients With Novel Coronavirus Pneumonia (COVID-19) in Convalescent Period: a Randomized Controlled Trial	pulmonary function;St Georges respiratory questionnaire, SGRQ;Modified Barthel Index, MBI;	C	Q	S
ChiCTR2000029459	The effect of pulmonary rehabilitation for pulmonary function and quality of life in patients with novel coronavirus pneumonia (COVID-19) in rehabilitation period	pulmonary function;St Georges respiratory questionnaire, SGRQ;	C	Q	S
ChiCTR2000029439	Combination of traditional Chinese medicine and western medicine in the treatment of common type novel coronavirus pneumonia (COVID-19)	Antipyretic time;Time of virus turning negative;	C	T	S
ChiCTR2000029400	Clinical Controlled Trial for Traditional Chinese Medicine in the treatment of Novel Coronavirus Pneumonia (COVID-19)	the rate of remission;	C	P	S
ChiCTR2000029432	A Real World Study for the Efficacy and Safety of Large Dose Tanreqing Injection in the Treatment of Patients with Novel Coronavirus Pneumonia (COVID-19)	Time for body temperature recovery;Chest X-ray absorption;	C	T	S
ChiCTR2000029431	Clinical study for the remedy of M1 macrophages target in the treatment of novel coronavirus pneumonia (COVID-19)	CT of lung;CT and MRI of hip;	R	Q	S
ChiCTR2000029381	A prospective comparative study for Xue-Bi-Jing injection in the treatment of novel coronavirus pneumonia (COVID-19)	pneumonia severity index (PSI);	C	Q	S
ChiCTR2000030179	Experimental study of novel coronavirus pneumonia rehabilitation plasma therapy severe novel coronavirus pneumonia (COVID-19)	Cure rate;Mortality;	C	P	S
ChiCTR2000030173	Key techniques of umbilical cord mesenchymal stem cells for the treatment of novel coronavirus pneumonia (COVID-19) and clinical application demonstration	pulmonary function;Novel coronavirus pneumonic nucleic acid test;	C	Q	S
ChiCTR2000030166	Randomized, parallel control, open trial for Qing-Wen Bai-Du-Yin combined with antiviral therapy in the treatment of novel coronavirus pneumonia (COVID-19)	CT scan of the lungs;Nucleic acid detection of throat secretion;	R	Q	S
ChiCTR2000030188	Clinical Study on Syndrome Differentiation of TCM in Treating Severe and Critical novel coronavirus pneumonia (COVID-19)	TCM symptom score;Becomes negative time of COVID-19;Cure / mortality rate;	C	Q	S
ChiCTR2000030170	Study for safety and efficacy of Jakotinib hydrochloride tablets in the treatment severe and acute exacerbation patients of novel coronavirus pneumonia (COVID-19)	Severe NCP group: Time to clinical improvement (TTCI) [time window: 28 days];Acute exacerbation NCP group: Time to clinical recovery [time window: 28 days] and the ratio of common to severe and critically severe.;	C	P	S
ChiCTR2000030167	Clinical Trial for Recombinant Human Interleukin-2 in the Treatment of Novel Coronavirus Pneumonia (COVID-19)	CD8+ T cells numbers;CD4+ T cell numbers;NK cell numbers;Fatality rate;Clinical recovery time;Critical (severe or critical) conversion rate;	L	Q	S
ChiCTR2000030165	Clinical study for ozonated autohemotherapy in the treatment of Novel Coronavirus Pneumonia (COVID-19)	Chest CT;Whole blood cell analysis;Recovery rate;Oxygenation index;Inflammatory response index;	R	Q	S
ChiCTR2000030113	Randomized controlled trial for safety and efficacy of Favipiravir in the treatment of novel coronavirus pneumonia (COVID-19) with poorly responsive ritonavir/ritonavir	Blood routine tests, Liver function examination, Renal function examination, Blood gas analysis, Chest CT examination;	L	Q	S
ChiCTR2000030138	Clinical Trial for Human Mesenchymal Stem Cells in the Treatment of Severe Novel Coronavirus Pneumonia (COVID-19)	Clinical index;	C	Q	S
ChiCTR2000030117	A multicenter, randomized, open, parallel controlled trial for the evaluation of the effectiveness and safety of Xiyanping injection in the treatment of common type novel coronavirus pneumonia (COVID-19)	Clinical recovery time;	C	T	S
ChiCTR2000030118	A clinical study for ''Huo-Shen'' particles in the treatment of novel coronavirus pneumonia (COVID-19)	Chest CT scan;Nucleic acid of novel coronavirus;Routine blood test;Routine urine test;Stool routine test;	R	Q	S
ChiCTR2000030116	Safety and effectiveness of human umbilical cord mesenchymal stem cells in the treatment of acute respiratory distress syndrome of severe novel coronavirus pneumonia (COVID-19)	Time to leave ventilator on day 28 after receiving MSCs infusion;	C	T	S
ChiCTR2000030090	A Prospective Randomized Controlled Trial for Home Exercise Prescription Intervention During Epidemic of Novel Coronary Pneumonia (COVID-19) in College Students	Mood index;	O	Q	O
ChiCTR2000030093	Study for application of simplified cognitive-behavioral therapy for related emergency psychological stress reaction of medical providers working in the position of treatment and control of novel coronavirus pneumonia (COVID-19)	State anxiety;	O	Q	O
ChiCTR2000030084	A multicenter study for efficacy of intelligent psychosomatic adjustment system intervention in the treatment of novel coronavirus pneumonia (COVID-19) patients with mild to moderate anxiety and depression	the score of Hamilton depression scale;the score of Hamilton anxiety scale;the score of Self-Rating Depression Scale;the score of Self-Rating Anxiety Scale;the score of Athens Insomnia Scale;	O	Q	O
ChiCTR2000030136	Humanistic Care in Patients With Novel Coronavirus Pneumonia (COVID-19)	recovery time;	C	T	S
ChiCTR2000030102	A multicenter randomized controlled trial for ozone autohemotherapy in the treatment of novel coronavirus pneumonia (COVID-19)	Chest imaging;RNA test of COVID-19;Time to remission/disappearance of primary symptoms: defined as the number of days when the three main symptoms of fever, cough, and shortness of breath are all relieved / disappeared;Completely antipyretic time: completely antipyretic was defined as the body temperature return to normal for over 24 hours.;Blood oxygen saturation;Time to 2019-nCoV RT-PCR negativ…	R	Q	S
ChiCTR2000030058	A multicenter, randomized, double-blind, controlled clinical trial for leflunomide in the treatment of novel coronavirus pneumonia (COVID-19)	The days from positive to negative for viral nucleic acid testing;	V	T	S
ChiCTR2000030043	Shen-Fu injection in the treatment of severe novel coronavirus pneumonia (COVID-19): a multicenter, randomized, open-label, controlled trial	pneumonia severity index (PSI);Incidence of new organ dysfunction;	C	Q	S
ChiCTR2000030041	A single-arm, single-center clinical trial for Azivudine tablets in the treatment of adult novel coronavirus pneumonia (COVID-19)	The novel coronavirus nucleic acid negative rate;	V	P	S
ChiCTR2000030089	A clinical study for the efficacy and safety of Adalimumab Injection in the treatment of patients with severe novel coronavirus pneumonia (COVID-19)	TTCI (Time to Clinical Improvement);	C	T	S
ChiCTR2000030088	Umbilical cord Wharton's Jelly derived mesenchymal stem cells in the treatment of severe novel coronavirus pneumonia (COVID-19)	The nucleic acid of the novel coronavirus is negative;CT scan of ground glass shadow disappeared;	V	P	S
ChiCTR2000030046	A single arm trial to evaluate the efficacy and safety of anti-2019-nCoV inactivated convalescent plasma in the treatment of novel coronavirus pneumonia patient (COVID-19)	The changes of clinical symptom, laboratory and radiological data ;Oxyhemoglobin saturation.;dyspnea;Body temperature;Radiological characteristic sign;Blood routine;C-reaction protein;lymphocyte count;Liver function: TBIL(total bilirubin), AST(alanine aminotransferase) and ALT(aspartate aminotransferase);Neutralization antibody level;	C	Q	S
ChiCTR2000030034	Traditional Chinese Medicine in the treatment of novel coronavirus pneumonia (COVID-19): a multicentre, randomized controlled trial	Body temperature;TCM syndrome integral;Murray lung injury score;The transition time of novel coronavirus nucleic acid;MuLBSTA score;	C	Q	S
ChiCTR2000030033	A study for the intervention of Xiangxue antiviral oral solution and Wu-Zhi-Fang-Guan-Fang on close contacts of novel coronavirus pneumonia (COVID-19)	Proportion of COVID-19 close contacts who have developed as confirmed cases;	C	P	P
ChiCTR2000030029	A multi-center study on the efficacy and safety of suramin sodium in adult patients with novel coronavirus pneumonia (COVID-19)	clinical cure rate;Incidence of mechanical ventilation by day28;All-cause mortality by day28;Incidence of ICU admission by day28;	C	P	S
ChiCTR2000030027	Traditional Chinese medicine cooperative therapy for patients with Novel coronavirus pneumonia (COVID-19) and its effect on spermatogenesis: a randomized controlled trial	Release rate of discharge standards for isolation;Change in Critical Illness;Traditional Chinese medicine syndrome score;	C	P	S
ChiCTR2000030054	A prospective, open label, randomized, control trial for chloroquine or hydroxychloroquine in patients with mild and common novel coronavirus pulmonary (COVIP-19)	Clinical recovery time;	C	T	S
ChiCTR2000030039	Clinical study for infusing convalescent plasma to treat patients with new coronavirus pneumonia (COVID-19)	SARS-CoV-2 DNA;SARS-CoV-2 antibody levels;thoracic spiral CT;	V	Q	S
ChiCTR2000030016	Basic and clinical study of inhalation of inactivated mycobacterium vaccine in the treatment of Novel coronavirus pneumonia (COVID-19)	viral negative-transforming time;30-day cause-specific mortality;30-day cause-adverse events;30-day all-cause mortality;co-infections;Time from severe and critical patients to clinical improvement;Others (liver function, kidney function, myocardial enzyme);	V	T	S
ChiCTR2000030007	Multicenter randomized controlled trial for rhG-CSF in the treatment of novel coronavirus pneumonia (COVID-19)	Clinical symptoms;Blood routine;the viral load of 2019-nCOV of throat swab;TBNK cell subsets;TH1/TH2 Cytokine;Chest CT;	C	Q	S
ChiCTR2000030012	Development of anti-2019-nCoV therapeutic antibody from the recovered novel coronavirus pneumonia patients (COVID-19)	NA;	NA	NA	NA
ChiCTR2000030010	A randomized, double-blind, parallel-controlled, trial to evaluate the efficacy and safety of anti-SARS-CoV-2 virus inactivated plasma in the treatment of severe novel coronavirus pneumonia patients (COVID-19)	Improvement of clinical symptoms (Clinical improvement is defined as a reduction of 2 points on the 6-point scale of the patient's admission status or discharge from the hospital);	C	Q	S
ChiCTR2000030006	A randomized controlled trial for the efficacy of ozonated autohemotherapy in the treatment of Novel Coronavirus Pneumonia (COVID-19)	Recovery rate;	C	P	S
ChiCTR2000030001	The efficacy and safety of Triazavirin for 2019 novel coronary pneumonia (COVID-19): a multicenter, randomized, double blinded, placebo-controlled trial	Time to Clinical recovery;	C	T	S
ChiCTR2000030020	The clinical application and basic research related to mesenchymal stem cells to treat novel coronavirus pneumonia (COVID-19)	Coronavirus nucleic acid markers negative rate;Symptoms improved after 4 treatments;Inflammation (CT of the chest);	V	P	S
ChiCTR2000030000	An open, controlled clinical trial for evaluation of ganovo combined with ritonavir and integrated traditional Chinese and Western medicine in the treatment of novel coronavirus infection (COVID-19)	Rate of composite advers outcomes:SpO2,PaO2/FiO2, respiratory rate;	M	P	H
ChiCTR2000029956	Chinese Medicine Promotes Rehabilitation Recommendations after 2019 Novel Coronavirus Infection (COVID-19)	Quality of life;Anxiety assessment;Depression assessment;Major symptoms improved;	O	Q	O
ChiCTR2000029996	A randomized, open-label, controlled trial for the efficacy and safety of Farpiravir Tablets in the treatment of patients with novel coronavirus pneumonia (COVID-19)	Time to Clinical Recovery;	C	T	S
ChiCTR2000029999	A clinical study for probiotics in the regulation of intestinal function and microflora structure of novel coronavirus pneumonia (COVID-19)	gut microbiome;Fecal metabolomics;Blood routine;albumin;serum potassium;CRP;ALT;AST;urea;Cr;urea nitrogen;D-Dimer;ESR;IgG;IgM;IgA;hepatitis B surface antigen;ß2-microglobulin;IFN-gama;IL-6;TNF-beta;IL-10;IL-2;IL-4;IL-13;IL-12;chest CT;abdominal CT;ECG;Weight;height;body temperature;respiratory rate;Heart Rate;Blood Pressure;Defecate frequency;Bristol grading;	O	O	O
ChiCTR2000029992	A prospective, randomized, open label, controlled trial for chloroquine and hydroxychloroquine in patients with severe novel coronavirus pneumonia (COVID-19)	Clinical recovery time;Clinical recovery time;Changes in viral load of upper and lower respiratory tract samples compared with the baseline;	C	T	S
ChiCTR2000030003	Optimization Protocal of Integrated Traditional Chinese and Western Medicine in the Treatment for Novel Coronavirus Pneumonia (COVID-19)	hospital stay;Discharge rate;Site-specific hospital metastasis rate or severe conversion rate;Body temperature normalization time;Clinical symptoms disappearance rate;	C	T	S
ChiCTR2000030002	Clinical study of novel NLRP Inflammasome inhibitor (Tranilast) in the treatment of novel coronavirus pneumonia (COVID-19)	cure rate;	C	P	S
ChiCTR2000029994	Liu-Zi-Jue Qigong and Acupressure Therapy for Pulmonary Function and Quality of Life in Patient with Severe novel coronavirus pneumonia (COVID-19): A Randomized Controlled Trial	lung function;ADL;6min walk;	C	Q	S
ChiCTR2000029978	A randomized controlled trial for the efficacy of Dao-Yin in the prevention and controlling novel coronavirus pneumonia (COVID-19)	Length of hospital stay;	C	T	S
ChiCTR2000029989	A randomized controlled Trial for therapeutic efficacy of Recombinant Human Interferon alpha 1b Eye Drops in the treatment of elderly with novel coronavirus pneumonia (COVID-19)	Arterial Blood Oxygen Saturation;TTCR,Time to Clinical recovery;temperature;respiratory rate;Lung CT;	L	Q	S
ChiCTR2000029988	Clinical Study of Chloroquine Phosphate in the Treatment of Severe Novel Coronavirus Pneumonia (COVID-19)	Time to Clinical Recovery;	C	T	S
ChiCTR2000029781	A multicenter, randomized, open and controlled trial for the efficacy and safety of Kang-Bing-Du granules in the treatment of novel coronavirus pneumonia (COVID-19)	Disappearance rate of fever symptoms;		P	S
ChiCTR2000029740	Efficacy of therapeutic effects of hydroxycholoroquine in novel coronavirus pneumonia (COVID-19) patients(randomized open-label control clinical trial)	oxygen index;max respiratory rate;lung radiography;count of lymphocyte;temperature;other infection;time when the nuleic acid of the novel coronavirus turns negative;prognosis;	C	Q	S
ChiCTR2000029990	Clinical trials of mesenchymal stem cells for the treatment of pneumonitis caused by novel coronavirus pneumonia (COVID-19)	Improved respiratory system function (blood oxygen saturation) recovery time;	C	Q	S
ChiCTR2000029960	Comparative study for integrate Chinese and conventional medicine the the treatment of novel coronavirus pneumonia (COVID-19) in Hu'nan province	TCM syndrome;	O	O	O
ChiCTR2000029972	A randomized controlled trial for the Efficacy of Ultra Short Wave Electrotherapy in the treatment of Novel Coronavirus Pneumonia (COVID-19)	the rate of Coronary virus nucleic acid negative at 7 days, 14 days, 21 days, and 28 days after Ultra Short Wave Electrotherapy;Symptom recovery at 7 days, 14 days, 21 days, and 28 days after Ultra Short Wave Electrotherapy;	V	P	S
ChiCTR2000029974	A prospective, multicenter, open-label, randomized, parallel-controlled trial for probiotics to evaluate efficacy and safety in patients infected with 2019 novel coronavirus pneumonia (COVID-19)	Time to Clinical recovery;Butyrate in feces;	C	T	S
ChiCTR2000029803	A prospective, randomized, open-label, controlled clinical study to evaluate the preventive effect of hydroxychloroquine on close contacts after exposure to the Novel Coronavirus Pneumonia (COVID-19)	Number of patients who have progressed to suspected or confirmed within 24 days of exposure to new coronavirus;	C	P	P
ChiCTR2000029780	A multicenter, randomized, open, controlled trial for the efficacy and safety of Shen-Qi Fu-Zheng injection in the treatment of novel coronavirus pneumonia (COVID-19)	Recovery time;	C	P	S
ChiCTR2000029851	A multicenter, randomized controlled trial for the efficacy and safety of Alpha lipoic acid (iv) in the treatment of patients of severe novel coronavirus pneumonia (COVID-19)	SOFA;	C	Q	S
ChiCTR2000029954	Efficacy and safety of honeysuckle oral liquid in the treatment of novel coronavirus pneumonia (COVID-19): a multicenter, randomized, controlled, open clinical trial	Recovery time;Pneumonia psi score;	C	P	S
ChiCTR2000030433	Application of Rehabilitation and Lung Eight-segment Exercise in Home Rehabilitation of Survivors from novel coronavirus pneumonia (COVID-19)	PCL;HRQL;IPAQ;PASE;	O	Q	O
ChiCTR2000030418	Application of rehabilitation lung exercise eight-segment exercise in patients with novel coronavirus pneumonia (COVID-19)	Post-traumatic stress disorder checklist;Clinical prognostic outcome;Il-6;Health-related quality of life inventory;	O	Q	O
ChiCTR2000030420	A Clinical Trial Study for the Influence of TCM Psychotherapy on Negative Emotion of Patients with Novel Coronavirus Pneumonia (COVID-19) Based on Network Platform	Psychological status;Treatment compliance;To evaluate the difference in isolation and rehabilitation of patients after discharge;	O	Q	O
ChiCTR2000030386	Study for moxibustion in the preventing of novel coronavirus pneumonia (COVID-19)	mood assessment;	O	Q	O
ChiCTR2000030432	Application of rehabilitation and Lung eight-segment exercise in front-line nurses in the prevention of novel coronavirus pneumonia (COVID-19) epidemic	PCL;PSQI;FSI;	O	Q	O
ChiCTR2000030398	A randomized, double-blind, placebo-controlled trial for evaluation of the efficacy and safety of bismuth potassium citrate capsules in the treatment of patients with novel coronavirus pneumonia (COVID-19).	Pharynx swabs, lower respiratory tract samples (sputum/endotracheal aspiration/alveolar lavage), and anal swabs rt-pcr of novel coronavirus nucleic acid negative conversion rate.;	V	P	S
ChiCTR2000030333	A randomized, open-label controlled trial for the efficacy and safety of Pirfenidone in patients with severe and critical novel coronavirus pneumonia (COVID-19)	K-bld questionnaire survey;Refers to the pulse oxygen;chest CT;blood gas;	C	Q	S
ChiCTR2000030442	Combination of Tocilizumab, IVIG and CRRT in severe patients with novel coronavirus pneumonia (COVID-19)	Inhospital time;	C	T	S
ChiCTR2000030424	A single-center, single-arm clinical trial for azvudine in the treatment of novel coronavirus pneumonia (COVID-19)	Sputum/nasal swab/pharyngeal swab/lower respiratory tract secretions were used to detect the negative conversion rate of the new coronavirus nucleic acid (tested daily after two days starting the azvudine tablets) and the negative conversion time.;	V	P	S
ChiCTR2000030317	Clinical study for a new type of Gastroscope isolation mask for preventing and controlling the novel coronavirus pneumonia (COVID-19) Epidemic period	During the operation, the patient's volume of local exhaled air from the mouth and nose, the patient's heart rate, respiratory rate and blood oxygen saturation;	C	Q	S
ChiCTR2000030314	Traditional Chinese medicine Ma-Xing-Shi-Gan-Tang and Sheng-Jiang-San in the treatment of children with novel coronavirus pneumonia (COVID-19)	temperature;respiratory symptoms;	C	Q	S
ChiCTR2000030324	Traditional Chinese Medicine 'Zang-Fu Point-pressing' massage for children with novel coronavirus pneumonia (COVID-19)	Temperature;Respiratory symptoms;	C	Q	S
ChiCTR2000030300	Umbilical cord mesenchymal stem cells (hucMSCs) in the treatment of high risk novel coronavirus pneumonia (COVID-19) patients	Time to disease recovery;Exacerbation (transfer to RICU) time;	C	T	S
ChiCTR2000030262	Clinical study for combination of anti-viral drugs and type I interferon and inflammation inhibitor TFF2 in the treatment of novel coronavirus pneumonia (COVID-19)	Viral load;Clinical features;Inflammation;Pulmonary imaging;	V	Q	S
ChiCTR2000030260	Clinical study for individualized nutritional assessment and supportive treatment of novel coronavirus pneumonia (COVID-19) patients in Tibetan Plateau	NRS 2002 score;BMI;triceps skinfold thickness (TSF);prealbumin;total albumin;leucocyte count;CRP;lymphocyte percentage;TNF- alpha;IL-6;	C	Q	S
ChiCTR2000030265	Study for continuous renal replacement therapy with adsorption filter in the treatment of the novel coronavirus pneumonia (COVID-19)	Inflammation factor;	L	Q	S
ChiCTR2000030215	Study for the efficacy of Kangguan No. 1-3 prescription in the treatment of novel coronavirus pneumonia (COVID19)	Routine physical examination;Vital signs: breathing, body temperature (armpit temperature);Blood routine;C-reactive protein;Liver and kidney function test;Myocardial enzyme content;ESR;T cell subsets;Cytokine;Liver, gallbladder, thyroid, and lymph node imaging;Chest CT;Infectious disease test;	NA	NA	NA
ChiCTR2000030196	A multicenter, single arm, open label trial for the efficacy and safety of CMAB806 in the treatment of cytokine release syndrome of novel coronavirus pneumonia (COVID-19)	the relive of CRS;	NA	NA	NA
ChiCTR2000030261	A study for the key technology of mesenchymal stem cells exosomes atomization in the treatment of novel coronavirus pneumonia (COVID-19)	Lung CT;	R	Q	S
ChiCTR2000030255	Efficacy and Safety of Jing-Yin Granule in the treatment of novel coronavirus pneumonia (COVID-19) wind-heat syndrome	Clearance rate and time of main symptoms (fever, fatigue, cough);	C	P	S
ChiCTR2000030259	Evaluation Danorevir sodium tablets combined with ritonavir in the treatment of novel coronavirus pneumonia (COVID-19): a randomized, open and controlled trial	Rate of composite advers outcomes: SpO2, PaO2/FiO2, respiratory rate;	M	P	H
ChiCTR2000030258	A multicenter, randomized, controlled trial for efficacy and safety of hydrogen inhalation in the treatment of novel coronavirus pneumonia (COVID-19) patients	temperature;respiratory rate;Blood oxygen saturation;Cough symptom;Lung CT;Fatality rate;	C	Q	S
ChiCTR2000030022	A parallel, randomized controlled clinical trial for the efficacy and safety of Pediatric Huatanzhike granules (containing ipecacuanha tincture) in the treatment of mild and moderate novel coronavirus pneumonia (COVID-19)	COVID-19 nucleic acid detection time from positive to negative (respiratory secretion) or (3,5,7,10 days from positive to negative rate);;Lung CT observation of inflammation absorption;;Proportion of cases with progressive disease;	V	T	S
ChiCTR2000030013	A prospective clinical study for recombinant human interferon alpha 1b spray in the prevention of novel coronavirus (COVID-19) infection in highly exposed medical staffs.	Blood routine examination;Chest CT;Arterial Blood Oxygen Saturation;	L	NA	S
ChiCTR2000030218	Study of Pinavir / Ritonavir Tablets (Trade Name: Kelizhi) Combined with Xiyanping Injection for Novel Coronavirus Pneumonia (COVID-19)	Clinical recovery time;Pneumonia Severity Index (PSI) score;	C	T	S
ChiCTR2000030219	Study for evaluation of integrated traditional Chinese and Western Medicine in the treatment of Novel Coronavirus Pneumonia (COVID-19)	Clinical symptoms;TCM syndrome;Lung imaging;Time of nucleic acid turning negative;	C	NA	S
ChiCTR2000030091	A prospective randomized controlled trial for the home exercise prescription intervention in nursing students during epidemic of novel coronary pneumonia (COVID-19)	Mood index;	O	Q	O
ChiCTR2000029991	A randomized, open-label, controlled trial for the safety and efficiency of Kesuting syrup and Keqing capsule in the treatment of mild and moderate novel coronavirus pneumonia (COVID-19)	cough;	NA	NA	NA
ChiCTR2000029755	A randomized, open, parallel-controlled clinical trial on the efficacy and safety of Jingyebaidu granules in treating novel coronavirus pneumonia (COVID-19)	Validity observation index;	NA	NA	NA
ChiCTR2000029975	Single arm study for exploration of chloroquine phosphate aerosol inhalation in the treatment of novel coronavirus pneumonia (COVID-19)	viral negative-transforming time;30-day cause-specific mortality;co-infections;Time from severe and critical patients to clinical improvement;	V	T	S
ChiCTR2000030225	Clinical Reseach of Acupuncture in the treatment of Novel Coronavirus Pneumonia (COVID-19)	Length of hospital stay;Discharge time of general type;Discharge time of severe type;	C	T	S
ChiCTR2000029387	Comparative effectiveness and safety of ribavirin plus interferon-alpha, lopinavir/ritonavir plus interferon-alpha and ribavirin plus lopinavir/ritonavir plus interferon-alphain in patients with mild to moderate novel coronavirus pneumonia	The time to 2019-nCoV RNA negativity in patients;	V	T	S
ChiCTR2000029386	Effectiveness of glucocorticoid therapy in patients with severe novel coronavirus pneumonia: a randomized controlled trial	SOFA score;	C	Q	S
ChiCTR2000029899	Evaluation the Efficacy and Safety of Hydroxychloroquine Sulfate in Comparison with Phosphate Chloroquine in Mild and Commen Patients with Novel Coronavirus Pneumonia (COVID-19): a Randomized, Open-label, Parallel, Controlled Trial	Time to Clinical Recovery, TTCR;	C	T	S
ChiCTR2000029898	Evaluation the Efficacy and Safety of Hydroxychloroquine Sulfate in Comparison with Phosphate Chloroquine in Severe Patients with Novel Coronavirus Pneumonia (COVID-19): a Randomized, Open-Label, Parallel, Controlled Trial	TTCI (Time to Clinical Improvement);	C	T	S
ChiCTR2000030535	Multi-Center Clinical Study on the Treatment of Patients with Novel Coronavirus Pneumonia (COVID-19) by Ebastine	Clinical therapeutic course;Pathogenic detectio;Chest CT;Laboratory indicators (blood routine, myocardial enzyme spectrum, inflammatory cytokines, etc.);	NA	NA	S
ChiCTR2000030522	Efficacy and safety of Ma-Xing-Gan-Shi decoction in the treatment of novel coronavirus pneumonia (COVID-19)	Time to Clinical Recovery (TTCR);	C	T	S
ChiCTR2000030503	Extracorporeal blood purification therapy using Li's Artifical Liver System for patients with severe novel coronavirus pneumonia (COVID19) patient	Mortality;	M	P	H
ChiCTR2000030540	Research for the mechanism of improvement of novel coronavirus pneumonia (COVID-19) patients' pulmonary exudation by continuous renal replacement therapy	Chest imaging;Oxygenation index;Extravascular pulmonary water;pulmonary vascular permeability index, PVPI;Inflammatory factors;Tissue kallikrein;	R	Q	S
ChiCTR2000030627	Study for using the healed novel coronavirus pneumonia (COVID-19) patients plasma in the treatment of severe critical cases	Tempreture;Virus nucleic acid detection;	C	Q	S
ChiCTR2000030518	Zedoary Turmeric Oil for Injection in the treatment of Novel Coronavirus Pneumonia (COVID-19): a randomized, open, controlled trial	Real-time fluorescent RT-PCR detection of pharyngeal swab were used to detect the negative conversion rate of the new coronavirus nucleic acid (tested after the end of medication) and the negative conversion time(measured every other day after the start of medication, determined according to clinical needs);Time to clinical improvement;Change in size of lesion area by chest CT;Time to fever subsi…	V	P	S
ChiCTR2000030487	A single-center, single-arm clinical trial for azvudine in the treatment of novel coronavirus pneumonia (COVID-19)	Sputum/nasal swab/pharyngeal swab/lower respiratory tract secretions were used to detect the negative conversion rate of the new coronavirus nucleic acid (tested daily after two days starting the azvudine tablets) and the negative conversion time;	V	P	S
ChiCTR2000030578	Clinical Prediction and Intervention of Pulmonary Function Impairment in Patients with Novel Coronavirus Pneumonia (COVID-19)	Pulmonary function;6 minutes walking distance;The Short Form -36 Healthy Survey;	C	Q	S
ChiCTR2000030490	To evaluate the efficacy and safety of diammonium glycyrrhizinate enteric-coated capsules combined with hydrogen-rich water in the treatment of novel coronavirus pneumonia (COVID-19)	Cure rate;	C	P	S
ChiCTR2000030472	An open and controlled clinical study to evaluate the efficacy and safety of Ganovo combined with ritonavir in the treatment of novel coronavirus pneumonia (COVID-19)	Rate of composite advers outcomes: SPO2, PaO2/FiO2 and respiratory rate;	M	P	H
ChiCTR2000030471	Efficacy and safety of lipoic acid injection in reducing the risk of progression in common patients with novel coronavirus pneumonia (COVID-19)	Progression rate from mild to critical/severe;	C	P	S
ChiCTR2000030484	HUMSCs and Exosomes Treating Patients with Lung Injury following Novel Coronavirus Pneumonia (COVID-19)	PaO2 / FiO2 or respiratory rate (without oxygen);Frequency of respiratory exacerbation;Observe physical signs and symptoms and record clinical recovery time;The number and range of lesions indicated by CT and X-ray of lung;Time for cough to become mild or absent;Time for dyspnea to become mild or no dyspnea;Frequency of oxygen inhalation or noninvasive ventilation, frequency of mechanical ventila…	C	Q	S
ChiCTR2000030481	The clinical value of corticosteroid therapy timing in the treatment of novel coronavirus pneumonia (COVID-19): a prospective randomized controlled trial	The time of duration of COVID-19 nucleic acid RT-PCR test results of respiratory specimens (such as throat swabs) or blood specimens change to negative.;	V	T	S
ChiCTR2000030467	A Randomized Controlled Trial for the Influence of TCM Psychotherapy on Negative Emotion of Patients with Novel Coronavirus Pneumonia (COVID-19) Based on Network Platform	Psychological status;	NA	NA	O
ChiCTR2000030469	A randomized parallel controlled trial for LIUSHENWAN in Treatment of Novel Coronavirus Pneumonia (COVID-19)	fever clearance time;Effective rate of TCM symptoms;	C	T	S
ChiCTR2000030475	Cytosorb in Treating Critically Ill Hospitalized Adult Patients with novel coronavirus pneumonia (COVID-19)	28 day mortality;	C	P	H
ChiCTR2000030480	Randomized, open, blank controlled trial for the efficacy and safety of recombinant human interferon alpha 1beta in the treatment of Wuhan patients with novel coronavirus pneumonia (COVID-19)	Incidence of side effects;	C	P	T
ChiCTR2000030479	Study for the Effectiveness and Safety of Yi-Qi Hua-shi Jie-Du-Fang in the Treatment of the Novel Coronavirus Pneumonia (COVID-19)	lasting time of fever;lasting time of novel coronavirus pneumonia virus nucleic acid detected by RT-PCR and negative result rate of the novel coronavirus disease nucleic acid;	C	P	S
ChiCTR2000029993	A pilot study for Integrated Chinese and Western Medicine in the treatment of non-critical novel coronavirus pneumonia (COVID-19)	Main symptom relief time;	C	T	S
ChiCTR2000029638	A Multicenter, Randomized, Controlled trial for Recombinant Super-Compound Interferon (rSIFN-co) in the Treatment of 2019 Novel Coronavirus (2019-nCoV) Infected Pneumonia	Clinical symptoms;Blood routine;Biochemical and myocardial enzymes;C-reactive protein;Erythrocyte sedimentation rate;Inflammatory cytokines;Chest CT;Etiology Inspection;Vital signs;	C	T	S
ChiCTR2000030477	oXiris Membrane in Treating Critically Ill Hospitalized Adult Patients with novel coronavirus pneumonia (COVID-19)	28 day mortality;	M	P	H
ChiCTR2000029550	Recommendations for Diagnosis and Treatment of Influenza Patients in the Hospital of Chengdu University of Traditional Chinese Medicine Under the Raging of Novel Coronavirus Pneumonia (COVID-19)	CRP;ESR;PCT;Tn;Mb;D-Dimer;blood routine examination;chest CT;creatase;	L	Q	C
ChiCTR2000029580	Severe novel coronavirus pneumonia (COVID-19) patients treated with ruxolitinib in combination with mesenchymal stem cells: a prospective, single blind, randomized controlled clinical trial	Safety;	C	P	T
ChiCTR2000029434	A randomized, open-label, blank-controlled trial for Lian-Hua Qing-Wen Capsule /Granule in the treatment of novel coronavirus pneumonia (COVID-19)	Clinical symptoms (fever, weakness, cough) recovery rate and recovery time;	C	P	S
ChiCTR2000029433	A randomized, open-label, blank-controlled trial for Lian-Hua Qing-Wen Capsule/Granule in the treatment of suspected novel coronavirus pneumonia (COVID-19)	Clinical symptoms (fever, weakness, cough) recovery rate and recovery time;	C	P	S
ChiCTR2000029757	Convalescent plasma for the treatment of severe and critical novel coronavirus pneumonia (COVID-19): a prospective randomized controlled trial	the number of days between randomised grouping and clinical improvement;	C	T	S
ChiCTR2000029549	Recommendations of Integrated Traditional Chinese and Western Medicine for Novel Coronavirus Pneumonia (COVID-19)	Severe conversion rate;Oxygenation index;2019-nCoV nucleic acid test;Chest CT;	C	P	S
ChiCTR2000029479	Research for Traditional Chinese Medicine Technology Prevention and Control of Novel Coronavirus Pneumonia (COVID-19) in the Community Population	Inccidence of 2019-nCoV pneumonia;	V	P	P
ChiCTR2000029308	A randomized, controlled open-label trial to evaluate the efficacy and safety of lopinavir-ritonavir in hospitalized patients with novel coronavirus pneumonia (COVID-19)	Clinical improvement time of 28 days after randomization;The 7-point scale;7 points: death;6 points: admission to ECMO and / or mechanical ventilation;5 points: Hospitalized for non-invasive ventilation and / or high-flow oxygen therapy;4 points: hospitalization for oxygen therapy;3 points: Hospitalization does not require oxygen therapy;2 points: discharged but not restored to normal functional …	C	T	S
ChiCTR2000030896	Clinical Application and Theoretical Discussion of Fu-Zheng Qing-Fei Thought in Treating Non-Critical Novel Coronavirus Pneumonia (COVID-19)	Improvement of symptoms;	C	NA	S
ChiCTR2000030897	Evaluation of the effect of taking Newgen beta-gluten probiotic composite powder to nutrition intervention of patients with novel coronavirus pneumonia (COVID-19)	serum albumin;siderophilin;prealbumin;lung CT scanning result;	L	Q	S
ChiCTR2000030892	Efficacy and Safety of Pirfenidone in the Treatment of Severe Post-Novel Coronavirus Pneumonia (COVID-19) Fibrosis: a prospective exploratory experimental medical study	HRCT pulmonary fibrosis score;	R	Q	S
ChiCTR2000030894	Favipiravir Combined With Tocilizumab in the Treatment of novel coronavirus pneumonia (COVID-19) - A Multicenter, Randomized, Controlled Trial	Clinical cure rate;	C	P	S
ChiCTR2000030864	Traditional Chinese Medicine for novel coronavirus pneumonia (COVID-19)	2019-ncov-RNA;Chest CT;Routine blood test;Blood biochemistry;TCM symptom;	V	P	S
ChiCTR2000030853	Evaluation of the protective effect of dexmedetomidine on patients with severe novel coronavirus pneumonia (COVID-19)	CK-MB;CTnI;neuron-specific enolase,NSE;BUN;scr.;lactic acid;	L	NA	S
ChiCTR2000030855	Study for the effect of external diaphragmatic pacing assisted invasive ventilation and weaning in patients with severe novel coronavirus pneumonia (COVID-19)	Length of stay in ICU;Diaphragm movement;	C	T	S
ChiCTR2000030836	Novel coronavirus pneumonia (COVID-19) combined with Chinese and Western medicine based on ''Internal and External Relieving -Truncated Torsion'' strategy	14 day outcome of the subjects, including: recovery, improvement, turning critical, death. ;Lung CT;	M	P	H
ChiCTR2000030841	Exploratory study for Immunoglobulin From Cured COVID-19 Patients in the Treatment of Acute Severe novel coronavirus pneuvirus (COVID-19)	Time to Clinical Improvement (TTCI);	C	T	S
ChiCTR2000030849	Investigation on psychological status of novel coronavirus pneumonia (COVID-19) rehabilitation patients in Zhengzhou City and research on coping strategies	SCL-90 scale;	O	Q	O
ChiCTR2000030835	Clinical study for the efficacy of Mesenchymal stem cells (MSC) in the treatment of severe novel coronavirus pneumonia (COVID-19)		NA	NA	NA
ChiCTR2000030832	Study for the pathogenesis and effective intervention of mood disorders caused by the novel coronavirus pneumonia (COVID-19)	PHQ-9;GAD-7;PHQ-15;PSS-14;ISI;SHARPS;ACTH;cortisol;24-hour ECG;Magnetic resonance spectroscopy;	O	Q	O
ChiCTR2000030810	Clinical observation and evaluation of traditional Chinese medicine in the treatment of novel coronavirus pneumonia (COVID-19) in Hubei 672 Orthopaedics Hospital of Integrated Chinese&Western Medicine	Average discharge time;WBC;ALT, AST, gama-GT, BUN, Cr, CK-MB;turn serious/crisis ratio;	C	P	S
ChiCTR2000030804	Exocarpium Citri Grandis Relieves Symptoms of Novel Coronavirus Pneunomia (COVID-19): a Randomized Controlled Clinical Trial	Cough Score;Expectoration score;	C	Q	S
ChiCTR2000030779	A clinical trial for Ulinastatin Injection in the treatment of patients with severe novel coronavirus pneumonia (COVID-19)	blood gas;SOFA score;	L	Q	S
ChiCTR2000030759	Study for the therapeutic effect and mechanism of traditional Chinese medicine in the treatment of novel coronavirus pneumonia (COVID-19)	The time for the positive nucleic acid of the novel coronavirus to turn negative;Incidence of deterioration;The defervescence time;Chest CT;Primary symptom remission rate;	V	T	S
ChiCTR2000030761	Continuous renal replacement therapy (CRRT) alleviating inflammatory response in severe patients with novel coronavirus pneumonia (COVID-19) associated with renal injury: A Prospective study	CRP;IL-6;TNF-alpha;IL-8;	L	NA	S
ChiCTR2000030773	Application of blood purification in the treatment of novel coronavirus pneumonia (COVID-19)	death;Number of failure organs;Length of hospital stay;	M	P	H
ChiCTR2000030751	Clinical Research for Traditional Mongolian Medicine in the treatment of novel coronavirus pneumonia (COVID-19)	nucleic acids probing;blood routine;blood biochemistry;Urine Routine;Blood Gas Analysis;CT;	V	NA	S
ChiCTR2000030750	A clinical study for effectiveness and safety evaluation for recombinant chimeric COVID-19 epitope DC vaccine in the treatment of novel coronavirus pneumonia	Shorten the duration of the disease;Antipyretic rate;Severe rate;Time of virus nucleic acid turning negative;Negative rate of viral nucleic acid;Time for improvement of lung image;PCT;CRP;IL-17;WBC;Lymphocyte subtype analysis;Blood gas analysis;	C	T	S
ChiCTR2000030720	Prognosis Investigation and Intervention Study on Patients with novel coronavirus pneumonia (COVID-19) in recovery period Based on Community Health Management	Medical imaging improvement rate in patients during recovery period;	R	P	S
ChiCTR2000030744	Clinical Application of ECMO(or Ultra-Protective Lung Mechanical Ventilation) in the Treatment of Patients with ARDS due to novel Coronavirus Pneumonia (COVID-19)	Inpatient mortality;ICU hospital stay;	M	P	H
ChiCTR2000030718	Randomized controlled trial for Chloroquine Phosphate in the Treatment of novel coronavirus pneumonia (COVID-19)	Time to Clinical Recovery;	C	P	S
ChiCTR2000030701	A randomized, parallel controlled open-label trial for the efficacy and safety of Prolongin (Enoxaparin Sodium Injection) in the treatment of adult patients with novel coronavirus pneumonia (COVID-19)	Time to Virus Eradication;	V	P	S
ChiCTR2000030702	Plasma of the convalescent in the treatment of novel coronavirus pneumonia (COVID-19) common patient: a prospective clinical trial	Time to clinical recovery after randomization;	R	P	S
ChiCTR2000030700	Study for the efficacy and safety of Prolongin (Enoxaparin Sodium Injection) in treatment of novel coronavirus pneumonia (COVID-19) adult common patients	Time to Virus Eradication;	V	P	S
ChiCTR2000030703	A randomized, blinded, controlled, multicenter clinical trial to evaluate the efficacy and safety of Ixekizumab combined with conventional antiviral drugs in patients with novel coronavirus pneumonia (COVID-19)	Lung CT;	R	NA	S
ChiCTR2000030545	Efficacy and safety of honeysuckle oral liquid in the treatment of novel coronavirus pneumonia (COVID-19): a multicenter, randomized, controlled, open clinical trial	Recovery time;Pneumonia psi score;	C	P	S
ChiCTR2000030580	Efficacy and safety of tozumab combined with adamumab(Qletli) in severe and critical patients with novel coronavirus pneumonia (COVID-19)	chest computerized tomography;Nucleic acid detection of novel coronavirus;TNF-alpha;IL-6;IL-10;	R	NA	S
ChiCTR2000030681	An anaesthesia procedure and extubation strategy for reducing patient agitation and cough after extubation that can be used to prevent the spread of Novel Coronavirus Pneumonia (COVID-19) and other infectious viruses in the operating Room	cough;agitation;	C	NA	S
ChiCTR2000030388	Efficacy and safety of Xue-Bi-Jing injection in the treatment of severe cases of novel coronavirus pneumonia (COVID-19)	The percentage of patients who convert to moderate one;The rate of shock;Endotracheal intubation ratio;Time spent on the ventilator;mortality;Time of virus nucleic acid test turning negative;	C	P	S
ChiCTR2000030476	Study for meditation assists for the rehabilitation of patients with novel coronaviruse pneumonia (COVID-19)	Self-rating depression scale;self-rating anxiety scale;Athens Insomnia Scale;	O	Q	O
ChiCTR2000030187	Clinical study for Lopinavir and Ritonavir in the treatment of novel coronavirus pneumonia (COVID-19)	Endotracheal intubation rate;mortality;Ratio of virus nucleic acid detection to negative;	C	P	S
ChiCTR2000031139	Safety and Effectiveness of Human embryonic stem cell-derived M cells (CAStem) for Pulmonary Fibrosis Correlated with novel coronavirus pneumonia (COVID-19)	Pulmonary function evaluation;Changes in blood gas analysis;Evaluation of activity;Evaluation of dyspnea;CT changes from baseline;	C	Q	S
ChiCTR2000031089	A medical records based study for Tou-Jie-Qu-Wen Granules in the Treatment of mild and moderate patients with novel coronavirus pneumonia (COVID-19)	syndrome;nucleic acid of nCoV-19;	NA	NA	NA
ChiCTR2000031138	Prospective exploratory clinical research on the efficacy and safety of pirfenidone capsules in the treatment of severe novel coronavirus pneumonia (COVID-19)	HRCT score;	R	Q	S
ChiCTR2000031090	Psychological Support for Diagnosed Patients with novel coronavirus pneumonia (COVID-19)	Pittsburgh sleep quality index;Self-rating anxiety scale;Self-rating depression scale;CD-RISC scale;	O	Q	O
ChiCTR2000031023	Perioperative immune prediction and intervention of tumor patients undergoing surgery during the novel coronavirus pneumonia (COVID-19) outbreak period	postoperative complication;occupancy rate of intensive care unit;2-year tumor-free survival and overall survival;	C	P	S
ChiCTR2000030989	Internet based Solution Focused Brief Therapy treating adolescent anxiety under the novel coronavirus pneumonia (COVID-19) outbreak: A randomized controlled trial	GAD-7;STAI-Y (C);	O	Q	O
ChiCTR2000030987	A Randomized Controlled Trial for Favipiravir Tablets Combine With Chloroquine Phosphate in the Treatment of Novel Coronavirus Pneumonia (COVID-19)	improvement or recovery of respiratory symptoms;viral nucleic acid shedding;	C	P	S
ChiCTR2000030996	Effect of Auricular point pressing on insomnia of novel coronavirus pneumonia (COVID-19) patients: a randomized controlled trial.	insomnia;anxiety;depression;comfort;	O	NA	O
ChiCTR2000030939	Preliminary evaluation of the safety and efficacy of oral LL-37 antiviral peptide (CAS001) in the treatment of novel coronavirus pneumonia (COVID-19)	nuclear acid test of faeces;nuclear acid test of the upper respiratory tract;IgM;IgG;CT test of lung;glutamic oxalacetic transaminase;glutamic-pyruvic transaminase;total bilirubin;direct bilirubin;urea nitrogen;lactic dehydrogenase;creatinine;lymphocyte;C-reactive protein;procalcitonin;erythrocyte sedimentation rate;	L	NA	O
ChiCTR2000030946	Effects of different VTE prevention methods on the prognosis of hospitalized patients with novel coronavirus pneumonia (COVID-19)	The biochemical indicators;	NA	NA	NA
ChiCTR2000030933	Effectiveness of ''Liu-Zi-Jue'' combined with respiratory muscle training for respiratory function in novel coronavirus pneumonia (COVID-19) patients: a randomized controlled trial	Maximal inspiratory pressure;Respiratory muscle evaluation;	C	Q	S
ChiCTR2000030944	Clinical study of human NK cells and MSCs transplantation for severe novel coronavirus pneumonia (COVID-19)	Changes of serum inflammatory factors;Patient death risk;Drug related adverse reactions and events;	L	Q	S
ChiCTR2000030929	A randomized, double-blind, parallel-controlled trial to evaluate the efficacy and safety of anti-SARS-CoV-2 virus inactivated plasma in the treatment of severe novel coronavirus pneumonia (COVID-19)	Improvement of clinical symptoms (Clinical improvement is defined as a reduction of 2 points on the 6-point scale of the patient's admission status or discharge from the hospital);	C	P	S
ChiCTR2000030539	Study for clinical oral characteristics of patients with novel coronavirus pneumonia (COVID-19) and Effect of 3% hydrogen peroxide gargle on the Intraoral novel coronavirus	novel coronavirus nucleic acid;	V	NA	S
ChiCTR2000030920	Evaluation of the effect of taking tricholoma matsutake, cannabis sativa capsule and dendrobium candidum to nutrition intervention of patients with novel coronavirus pneumonia (COVID-19) during convalescence.	Albumin;Cellular immune indicators (total lymphocyte count (TLC) and T lymphocyte subsets (CD3, CD4));	L	Q	S
ChiCTR2000029868	Hydroxychloroquine treating novel coronavirus pneumonia (COVID-19): a randomized controlled, open label, multicenter trial	Viral nucleic acid test;	V	NA	S
ChiCTR2000030922	Prospective, open-label, controlled, multicenter cohort study of long-acting interferon plus ribavirin in patients with novel coronavirus pneumonia (COVID-19)	COVID-19 nucleic acid negative conversion rate;Causal mortality;All-cause mortality;	V	P	S
ChiCTR2000030254	the Efficacy and Safety of Favipiravir for novel coronavirus–infected pneumonia: A multicenter, randomized, open, positive, parallel-controlled clinical study	Clinical recovery rate of day 7;	C	P	S
IRCT20100228003449N28	Interferon in treatment of COVID-19	Response to the treatment. Timepoint: Daily. Method of measurement: According the clinical, paraclinical and laboratory findings.;Complications of the treatment. Timepoint: Daily. Method of measurement: Interview and patient's record.	C	P	S
IRCT20160625028622N1	The effect of Noscapine on clinical and pulmonary manifestations of COVID-19 patients	Cough. Timepoint: Daily. Method of measurement: Clinical finding.;O2 Saturation. Timepoint: daily. Method of measurement: Pulse Oximeter.;Radiographic features Findings. Timepoint: Before/After. Method of measurement: Radiography- CT SCAN.	C	P	S
ChiCTR2000029658	Nasal high-fow preoxygenation assisted fibre-optic bronchoscope intubation in patients with critical novel coronavirus pneumonia (COVID-19)	the lowest SpO2 during intubation;	C	Q	S
ChiCTR2000029573	A multicenter, randomized, open, controlled clinical study to evaluate the efficacy and safety of recombinant cytokine gene-derived protein injection in combination with standard therapy in patients with novel coronavirus infection	The time required for RNA Yin conversion of novel coronavirus in respiratory or blood specimens was compared between treatment groups The difference of;	V	T	S
EUCTR2020-000890-25-FR	Hydroxychloroquine as a treatment for coronavirus disease COVID-19	Main Objective: To shorten the period of virus carrying and thus contagion;Secondary Objective: To evaluate the clinical effectiveness of treatment on time to apyrexia, normalization of respiratory rate, and average length of hospital stay and mortality.;Primary end point(s): Results of SARS-COV2 virus detection ;Timepoint(s) of evaluation of this end point: Day 1, Day 4, Day 7 and Day 14	NA	T	P
ChiCTR2000029496	A randomized, open label, parallel controlled trial of evaluating the efficacy of recombinant cytokine gene-derived protein injection for clearing novel coronavirus in patients with novel coronavirus pneumonia (COVID-19)	novel coronavirus nucleic acid clearance rate;	V	P	S
IRCT20100228003449N27	Interferon ß in treatment of COVID-19	Response to the treatment. Timepoint: Daily. Method of measurement: According the clinical, paraclinical and laboratory findings.;Complications of the treatment. Timepoint: Daily. Method of measurement: Interview and patient's record.	C	P	S
IRCT20200316046792N1	Effect of herbal syrup and solution in treatment of COVID-19	Response to the treatment (Significant clinical improvement). Timepoint: At baseline and on the third, fifth, seventh, and tenth days after starting the treatment. Method of measurement: According to the clinical, paraclinical and laboratory findings. Clinical improvement: normalization of the body temperature (=37.2 ° C), respiratory rate (=24 breaths per minute), oxygen saturation (> 94% at roo…	C	P	S
IRCT20151227025726N12	Evaluting the therapeutic and adverse effects of Interferon beta 1-a in patients with novel Coronavirus(COVID-19)	Clinical response to therapy. Timepoint: Daily. Method of measurement: Clinical symptoms.	C	P	S
IRCT20100228003449N30	Combination therapy in COVID 19	Clinical response. Timepoint: Every other day. Method of measurement: Evaluation of clinical signs and symptoms.;Paraclinical response. Timepoint: Every other day. Method of measurement: Laboratory and radiological findings.;Adverse drug reactions. Timepoint: Every other day. Method of measurement: Interview and laboratory data.	C	P	S
JPRN-jRCTs031190226	Favipiravir in patients infected with COVID-19	expected value and 95% CI of ratio of C-reactive protein before versus after the treatment	L	Q	S
JPRN-jRCTs041190120	Favipiravir for SARS-CoV-infected patients	Proportion of subjects with clearance of SARS-CoV2 in nasopharyngeal swab on Day 6	V	P	S
IRCT20100228003449N29	?Effect of sofosbuvir/ ledipasvir on COVID-19	Response to the treatment (improvement of patients' chief complaint, abnormal paraclinic and radiologic findings). Timepoint: Daily. Method of measurement: According the clinical, paraclinical and laboratory findings.;Gastrointestinal complications. Timepoint: Daily. Method of measurement: Interview and patient's record.;Cutaneous complications. Timepoint: Daily. Method of measurement: Interview …	C	P	S
IRCT20200128046294N2	Study to Evaluate the Safety and Efficacy of Sofosbuvir/Daclatasvir in Participants with Moderate to Severe Coronavirus Disease (COVID-19)	Clinical recovery (composite) within 14 days from initiation of study treatment until normalization of fever (=37.2 °C oral), respiratory rate (=24/minute on room air), and oxygen saturation (=94% on room air), sustained for at least 24 hours. Timepoint: daily up to 14 days after starting the trial. Method of measurement: Clinical examination.	C	P	S
JPRN-jRCTs031190227	Triple combination therapy in patients infected with COVID-19	expected value and 95% CI of ratio of C-reactive protein before versus after the treatment	L	Q	S
ChiCTR2000031319	Safety and Efficacy Study of Allogeneic Human Dental Pulp Mesenchymal Stem Cells to Treat Severe novel coronavirus pneumonia (COVID-19) patients	TTCI;	NA	NA	NA
ChiCTR2000031328	The protective effect of sleep psychology and music therapy of novel coronavirus pneumonia (COVID-19) mild and moderate type patients	Self-assessment of sleep quality;Efficient of sleep improvement;	O	Q	O
ChiCTR2000031271	Metabolic abnormalities and rearrangement reversal treatment of patient with novel coronavirus pneumonia (COVID-19)	Hospital stay or death ratio of experimental group / death ratio of control group;	M	P	H
ChiCTR2000031272	The effectiveness of mindfulness intervention in improving people's psychological and physical well-being during novel coronavirus pneumonia (COVID-19) outbreak	Anxiety level;Sleep;	O	Q	O
ChiCTR2000031203	Study for the effect of Moxibustion Guidance and Intervention based on internet for the discharged patients with novel coronavirus pneumonia (COVID-19)	TCM Syndrome Scale;	O	Q	O
ChiCTR2000031204	A multicenter, single-blind, randomized controlled clinical trial for chloroquine phosphate in the treatment of novel coronavirus pneumonia (COVID-19)	Clearance time of virus RNA;	V	T	S
ChiCTR2000030940	Study for ''Bai-Du Duan Fang'' application on the acupoint in the treatment of general type novel coronavirus pneumonia (COVID-19)	Quantitative table of main symptom grading;Quantitative table of lung physical signs grading;	C	Q	S
ChiCTR2000030937	A randomized, open-label, controlled trial for Gu-Shen Ding-Chuan-Wan in the treatment of patients with novel coronavirus pneumonia (COVID-19) at recovery phase with Fei-Pi-Qi-Xu Zhen	The change of TCM syndrome integral of deficiency of Fei-Pi-Qi-Xu Zhen;The results and changes of fatigue assessment scale at each time point;	C	Q	S
ChiCTR2000031196	Efficacy and optimization of antiviral therapy for novel coronavirus pneumonia (COVID-19) patients	time till the SARS-CoV-2 clearance;	V	T	S
ChiCTR2000030988	A RCT for Hua-Shi Bai-Du granules in patients with novel coronavirus pneumonia (COVID-19)	Inflammation absorption on Chest CT;	R	NA	S
ChiCTR2000030936	A real-world study for the Chinese medicines ''Xinguan 2'' and ''Xinguan 3'' in the treatment of novel coronavirus pneumonia (COVID-19)	Body temperature returns to normal time;After the medication, the disappearance rate of TCM symptoms;	C	T	S
ChiCTR2000030923	The treatment and diagnosis plan of integrated traditional Chinese and Western medicine for novel coronavirus pneumonia (COVID-19)	Incidence of COVID-19 pneumonia;COVID-19 pneumonia rate of improvement;	V	P	P
ChiCTR2000030288	Efficacy of Traditional Chinese Medicine in the Treatment of Novel Coronavirus Pneumonia (COVID-19): a Randomized Controlled Trial	The time to 2019-nCoV RNA negativity in patients;	V	T	S
ChiCTR2000030704	Observation Of Clinical Efficacy And Safety Of Bufonis Venenum Injection In The Treatment Of Severe Novel Coronavirus Pneumonia (COVID-19)	PO2/FiO2;ROX INDEX;	L	Q	S
ChiCTR2000030028	Clinical comparative study of PD-1 mAb in the treatment of severe and critical patients with novel coronavirus pneumonia (COVID-19)	Neutrophil count;Lymphocyte count;Monocyte / macrophage count;Monocyte / macrophage function test;NK cell count;DC cell count;PD-1( immunosuppressive biomarker );PD-L1(immunosuppressive biomarker );CTLA4 (immunosuppressive biomarker );CD79;Blnk;Il7r;T lymphocyte count;CD4+ T lymphocyte count;CD8+ T lymphocyte count;B lymphocyte count;NK cell count;Proportion of navie CD4+ T lymphocytes to CD4+ T …	L	Q	O
ChiCTR2000030198	Clinical research of pulmonary rehabilitation in survivors due to severe or critial novel coronavirus pneumonia (COVID-19)	pulmonary function;	C	Q	S
ChiCTR2000029976	The effect of Gymnastic Qigong Yangfeifang on functional recovery and quality of life in patients with mild novel coronavirus pneumonia (COVID-19)	Oxygen Inhalation Frequency;Oxygen Intake Time;cough;Degree of expiratory dyspnoea;	C	Q	S
EUCTR2020-001162-12-FR	Sarilumab COVID-19	Timepoint(s) of evaluation of this end point: Baseline to Day 29;Primary end point(s): Phase 2: time to resolution of fever for at least 48 hours without antipyretics or until discharge, whichever is sooner<br>Phase 3: The percentage of patients reporting each severity rating on the 7-point ordinal scale;Secondary Objective: Evaluate the clinical efficacy of sarilumab compared to the control arm …	C	T	S
EUCTR2020-001243-15-BE	Covid-19: A randomized, open-label, adaptive, proof-of- concept clinical trial of new antiviral drug candidates against SARS-CoV-2.	Timepoint(s) of evaluation of this end point: Day 15;Primary end point(s): Clinical status of subject at day 15 (on a 7-point ordinal scale): <br>1. Not hospitalized, no limitations on activities <br>2. Not hospitalized, limitation on activities; <br>3. Hospitalized, not requiring supplemental oxygen; <br>4. Hospitalized, requiring supplemental oxygen; <br>5. Hospitalized, on non-invasive ventila…	C	P	S
EUCTR2020-000919-69-NL	Reducing health care workers absenteeism in Coronavirus 2019 pandemic nu enhancement of the immune system through vaccination with Bacillus Calmette-Guérin	Timepoint(s) of evaluation of this end point: Between day 0 up to day 180 after inclusion;Primary end point(s): Number of days of unplanned absenteeism for any reason ;Secondary Objective: To reduce hospital admission, ICU admission or death in HCW with direct patient contacts during the epidemic phase of SARS-CoV-2.;Main Objective: To reduce absenteeism among HCW with direct patient contacts dur…	C	P	P
EUCTR2020-001224-33-DE	Systematic study of the medicine hydroxychloroquine against placebo for the treatment of adult patients with acute coronavirus disease 2019 – COVID-19	Timepoint(s) of evaluation of this end point: One interim analysis for evaluating the primary efficacy endpoint is planned for this study. The interim analysis will be done when 40% of events have accrued. In case the interim analysis shows a HR > 1.93 (nominal p < 0.0018), efficacy is shown and the trial may be stopped. Final analysis upon completion of the trial and final database lock.;Primary…	V	T	S
EUCTR2020-000982-18-NO	A clinical study to evaluate the efficacy of different anti-viral drugs in SARS-CoV-2 infected patients (COVID-19)	Timepoint(s) of evaluation of this end point: Please see above;Primary end point(s): The primary endpoint will be in-hospital mortality. The primary endpoint will be the same as the primary endpoint in the core WHO protocol.;Secondary Objective: Not applicable;Main Objective: 1. To investigate the effect of Remdesivir and Hydroxychloroquine in COVID 19 infection in relation to the defined primary…	M	P	H
EUCTR2020-001023-14-GB	a trial of an inhaled antiviral drug to treat or prevent severe respiratory difficulties in patients with COVID-19	Main Objective: To assess whether SNG001 is well tolerated, and can prevent or accelerate recovery of lower respiratory tract illness in patients with SARS-CoV-2 infection.;Secondary Objective: To understand more about the biology of how SNG001 affects patients and the virus infection, this will be done by assessing changes in biomarkers in blood and sputum if they are available.;Primary end poin…	C	P	T
ISRCTN50189673	A randomised trial of treatments to prevent death in patients hospitalised with COVID-19 (coronavirus)	Number of hospitalised patients who died within 28 days of randomisation, data collected via a secure web-based case report form	M	P	H
ChiCTR2000031630	Clinical study for Celebrex in the treatment of novel coronavirus pneumonia (COVID-19)	Prostaglandin E2;	L	Q	O
ChiCTR2000031540	Study for clinical effect of rehabilitation nursing program for patients with novel coronavirus pneumonia (COVID-19)	6minu tewalkingtest,6MWT;mMRC;Rating of Perceived Exertion Scale;SAS;	O	Q	O
ISRCTN14966673	Does point-of-care testing for coronavirus in hospital improve patient care compared to laboratory testing?	Time from COVID-19 test being requested to the result being available to clinical teams in minutes and hours, recorded during hospitalisation	O	Q	O
ChiCTR2000031639	Effects of a single session internet-delivered cognitive behavioral therapy for Acute Insomnia during the pandemic of novel coronavirus pneumonia (COVID-19)	Sleep diary;The insomnia severity index;Sleep visual analogue scale;	O	Q	O
ChiCTR2000031453	Efficacy and safety of Nintedanib esilate soft capsules in the treatment of pulmonary fibrosis in healed moderate to severe patients of novel coronavirus pneumonia (COVID-19): a single-center, randomized, placebo-controlled trial	FVC;	C	Q	S
ChiCTR2000031503	Application of non-invasive multichannel cardiopulmonary monitoring cloud management platform in patients with Novel Coronavirus Pneumonia (COVID-19)	Exposure time in the medical cabin;Hospitalization period;Detection rate of arrhythmia;	O	T	O
ChiCTR2000031501	The efficacy of convalescent plasma in patients with critical novel coronavirus pneumonia (COVID-19): a pragmatic, prospective cohort study	hospital mortality;	M	P	H
NL8483	A weapon against COVID-19: (Social) media and influencers	Elevation of proper hygiene behaviour (behavioural change)	O	NA	O
NL8490	An open label randomized controlled trial of chloroquine, hydroxychloroquine or only supportive care in patients admitted with moderate to severe COVID-19	- Composite endpoint with disease progression defined as a NEWS2score = 7 within 14 days or resulting in admission to Intensive/Medium Care unit or resulting in death within 14 days.	NA	NA	NA
NL8491	Countering Lung Damage in COVID-19 infection (CounterCovid) study	time to liberation from ventilation and supplemental oxygen and alive during a 28day period after randomization	M	P	H
ChiCTR2000031430	Clinical study of human umbilical cord mesenchymal stem cells in the treatment of novel coronavirus pneumonia (COVID-19) induced pulmonary fibrosis	Electrocardiogram;St George's Respiratory Questionnaire Score;High resolution CT for chest;Blood gas analysis;Percutaneous blood oxygen saturation;6 min walking distance;Pulmonary function VCmax;Blood routine;Liver and kidney function;Cytokine analysis;Immunoglobulin;Lymphocyte subsets;Coagulation;Myocardial enzymes;Serum ferritin;Procalcitonin;IL-6;Lactic acid;D-Dimer;CRP;	C	Q	S
ISRCTN16912075	RECOVERY Respiratory Support: Respiratory Strategies in patients with coronavirus COVID-19 – CPAP, high-flow nasal oxygen, and standard care	Composite outcome comprising tracheal intubation or mortality within 30 days. Mortality will be reported from hospital records up until discharge and tracked after discharge. Intubation will be obtained from hospital data.	M	P	H
ISRCTN83971151	Public health emergency SOLIDARITY trial of treatments for COVID-19 infection in hospitalized patients	All-cause mortality, subdivided by the severity of disease at the time of randomization, measured using patient records throughout the study	M	P	H
ISRCTN86534580	A trial evaluating treatments for suspected coronavirus infection in people aged 50 years and above with pre-existing conditions and those aged 65 years and above	The need for hospital admission or death, for patients aged =50 years with comorbidity, and aged =65 with or without comorbidity and suspected COVID-19 infection during time of prevalent COVID-19 infections, measured by hospital admission or mortality related to suspected COVID-19 within 28 days	M	P	H
EUCTR2020-001270-29-GB	Hydroxychloroquine for COVID 19 in moderately to severely ill hospitalized patients	Main Objective: Evaluate the effect of hydroxychloroquine (HCQ) + standard of care as compared to standard of care only on oxygen saturation/fraction of inspired oxygen (SpO2/FiO2) ratio in adult patients hospitalized with moderate to severe Coronavirus Disease 2019 (COVID-19) ;Secondary Objective: Evaluate the clinical efficacy of HCQ + standard of care as compared to standard of care only in ad…	C	P	S
EUCTR2020-001236-10-NL	Countering Lung Damage in COVID-19 infection: the CounterCovid Study	Main Objective: To test whether treatment with oral imatinib reduce disease burden and consumption of medical resources.;Secondary Objective: The secondary objective is to evaluate the pharmacokinetics of a 10-day course of oral imatinib in patients with severe Covid19 pneumonitis.;Primary end point(s): Composite outcome of death / need for invasive ventilation / need for ECMO ;Timepoint(s) of ev…	M	P	H
EUCTR2020-001172-15-DK	Recombinant human angiotensin-converting enzyme 2 (rhACE2) as a treat-ment for patients with COVID-19	Main Objective: To assess clinical efficacy of APN01 using a composite outcome of all cause-death or need of invasive mechanical ventilation up to 28 days;Secondary Objective: To assess efficacy of APN01 using log transformed levels of Lactate dehydrogenase (LDH) as a surrogate marker for organ damage.<br>To evaluate the safety of APN01 in patients with severe COVID-19<br>To monitor other biomark…	M	P	H
EUCTR2020-001386-37-IT	Efficacy of Tocilizumab - COVID-19	Main Objective: ;Secondary Objective: ;Primary end point(s):	NA	NA	NA
ChiCTR2000031494	Clinical study for stem cells in the treatment of severe novel coronavirus pneumonia (COVID-19)	Chest Imaging;lung function;ADL;	R	Q	S
EUCTR2020-001010-38-NO	NORWEGIAN CORONAVIRUS DISEASE 2019 [NO-COVID-19] STUDY: A TRIAL TO EVALUATE THE ANTIVIRAL EFFECT OF CHLOROQUINE IN ADULT PATIENTS WITH SARS-COV-2 INFECTION	Main Objective: To assess whether early treatment with chloroquine in patients with established COVID-19 will significantly reduce replication rate of SARS-CoV-2.;Secondary Objective: • Assess the impact of early treatment with chloroquine in patients with established COVID-19 on rate of decline in SARS-CoV-2 viral load in nasopharyngeal samples as assessed by RT-PCR from baseline to 96 hours<br>…	V	T	S
EUCTR2020-000936-23-FR	Multi-centre, adaptive, randomized trial of the safety and efficacy of treatments of COVID-19 in hospitalized adults - DisCoVeRy	Main Objective: The overall objective of the study is to evaluate the clinical efficacy and safety of different investigational therapeutics relative to the control arm in patients hospitalized with COVID-19.<br>• The primary endpoint is subject clinical status (on a 7-point ordinal scale) at day 15 <br>;Secondary Objective: Evaluate clinical efficacy of different investigational therapeutics as …	W	Q	H
ChiCTR2000031454	Clinical study for prevention and treatment of digestive tract lesions caused by novel coronavirus pneumonia (COVID-19)	2019-ncov nucleic acid yin rate;Blood 2019-ncov nucleic acid positive;Positive 2019-ncov nucleic acid in feces;Nasopharyngeal swab positive for 2019-ncov nucleic acid;	V	P	S
ACTRN12620000448943	Expressive Writing To Combat Distress Associated With The COVID-19 Pandemic In People With Inflammatory Bowel Disease	Distress measured on Kessler Psychological Distress Scale (K10)[Baseline, post-intervention (within one week since the completion of the intervention, primary endpoint), 3 months post-intervention]	O	Q	O
ACTRN12620000445976	To compare the effectiveness of two drugs (hydroxychloroquine and lopinavir/ritonavir alone or combined in treating hospitalized patients with confirmed COVID-19 compared to standard of care	Proportion of participants alive and not having required intensive respiratory support (invasive or non-invasive ventilation or humidified high flow nasal oxygen flow) at 15 days after enrolment.<br><br>This outcome is assessed by the number of patients who are not admitted into the intensive care unit (ICU)<br><br>[15 days after enrolment]	M	P	H
EUCTR2020-001254-22-BE	Sargramostim in patients with acute hypoxic respiratory failure due to COVID-19	Main Objective: The primary objective is to investigate whether the administration of inhaled sargramostim (Leukine®) at a dose of 250 mcg daily during 5 days improves oxygenation in COVID-19 patients with acute hypoxic respiratory failure .;Secondary Objective: - to study if early intervention with sargramostim is safe (number of AEs/SAEs)<br>- to study if early intervention with inhaled sargram…	C	P	S
EUCTR2020-001039-29-GR	MANAGEMENT OF NOVEL SARS CORONAVIRUS	Main Objective: Our aim is to conduct one trial of personalized immunotherapy in patients with SARS-CoV-2 associated with organ dysfunction and with laboratory findings of macrophage activation syndrome or immune dysregulation. These patients will be selected by the use of a panel of biomarkers and laboratory findings and they will be allocated to immunotherapy treatment according to their needs.…	C	P	S
EUCTR2020-001345-38-GR	CHROLOQUINE PHOSPHATE AGAINST INFECTION BY THE NOVEL CORONAVIRUS	Main Objective: Achieving one of two goals on day 8 visit from study initiation:<br>• 50% reduction in symptom score for patients with lower respiratory tract infection<br>• Lack of progression to lower respiratory tract infection in patients enrolled in the study due to upper respiratory tract infection<br><br>Patients leaving the hospital alive before day 8 visit are considered to have reached …	C	P	S
ACTRN12620000417987	Chloroquine Chemorophylaxis Countermeasure against COVID-19	Number of sick days (SDS) during the study period: The number of sick days will be obtained from participants medical records as defined as the number of days deemed 'not fit for duty/work' by their reviewing medical professional, and will be compared between participants randomised to chloroquine and vitamin C.[12 weeks post-commencement of the IMP. Study to commence Apr 2020.]	O	Q	P
ACTRN12620000443998	Home rehabilitation for people with COVID-19: Implementing telehealth approaches to care	Integration to community as measured on the Reintegration to Normal Living Index (RNLI) - A 11-item questionnaire-based instrument that measures the degree to which individuals achieve reintegration into normal social activities (such as recreation, movement in the community, and interaction in family or other relationships). [Baseline, <br>Three (3) months following baseline assessment. ]	O	Q	O
EUCTR2020-001271-33-FR	HYCOVID - Hydroxychloroquine versus placebo chez les patients ayant une infection COVID-19 à risque d’aggravation secondaire : étude prospective multicentrique randomisée en double aveugle	Main Objective: L’objectif principal est d’évaluer l’efficacité de l’hydroxychloroquine versus placebo sur le taux de décès ou de recours à une ventilation invasive chez les patients ayant une infection COVID-19 à haut risque d’aggravation.;Secondary Objective: Les objectifs secondaires sont :<br><br>1) Évaluer l’efficacité de l’hydroxychloroquine versus placebo chez les patients COVID-19 sur : <…	M	P	H
EUCTR2020-001281-11-FR	Evaluation of the concentration/viral effect relationship of hydroxychloroquine in COVID-19 patients in the intensive care unit..	Main Objective: to describe the pharmacokinetics of hydroxychloroquine in resuscitation patients infected with SARS-CoV-2.;Secondary Objective: - Describe the relationship between HCQ concentration and cardiac toxicity.<br>- To describe the pharmacokinetic (concentration) and pharmacodynamic (viral load) relationship of hydroxychloroquine in resuscitation patients infected with SARS-CoV-2.<br>- T…	L	Q	O
EUCTR2020-001275-32-DK	Anti-il6 treatment of serious COVID-19 disease with threatening respiratory failure	Main Objective: To investigate the effect of different types of IL-6 inhibition versus no adjuvant treatment compared to standard of care in patients with severe SARS-CoV-2 pneumonia. ;Secondary Objective: Not applicable;Primary end point(s): Time to independence from supplementary oxygen therapy in days ;Timepoint(s) of evaluation of this end point: Up to 28 days	C	T	S
EUCTR2020-001500-41-BE	Treatment of COVID-19 patients with anti-interleukin drugs	Main Objective: Study if blockade of IL-6 +/- IL-1 to block the cytokine storm and acute lung injury in comparison with usual care reduces time to clinical improvement as defined by an increase of more than 2 on the 6 point ordinal scale or discharge from the hospital;Secondary Objective: -to investigate whether treatment with either tocilizumab, siltuximab, anakinra or combinations thereof<br>-i…	C	Q	S
ACTRN12620000447954	Use of therapeutic drug monitoring (TDM) to optimise oral/enteral hydroxychloroquine dosing in critically ill patients with COVID-19	Dose adjustment required to attain a steady-state target trough hydroxychloroquine concentration of 0.24mg/L using TDM (proportion of patients / magnitude of adjustments)<br><br>Dose adjustment data will be collected and maintained by the senior ICU clinical pharmacist.[Up to the point of ICU discharge, in the first 10 days after commencement of initial HCQ dose, ]	O	Q	O
NCT04344600	Peginterferon Lambda-1a for the Prevention and Treatment of SARS-CoV-2 Infection	Proportion of participants with no evidence of SARS-CoV-2 infection|Time (days) to no detection of SARS-CoV-2 in two upper respiratory samples	V	P	S
NCT04344379	Prevention of SARS-CoV-2 in Hospital Workers s Exposed to the Virus	To assess the impact of hydroxychloroquine and azithromycin on the prevention of SARS-CoV-2 contamination in hospital workers exposed to 40 days of treatment.|Reducing clinical episodes due to suspected SARS-2 CoV infection confirmed by PCR|Reducing seroconversion for SARS-CoV-2 without any clinical sign|Evaluation of drug tolerance in the study|Evaluation on work stopping of hospital workers|Obs…	V	P	P
NCT04343963	Pyridostigmine in Severe SARS-CoV-2 Infection	Critical condition or death|IL-6	M	P	H
NCT04343053	Pro-thrombotic Status in Patients With SARS-Cov-2 Infection	on-treatment platelet reactivity|apoptosis rate in human umbilical vein endothelial cells (HUVEC)|Nitric oxide (NO) intracellular levels|reactive oxygen species (ROS) levels|coagulation factors levels|respiratory function|cardiac function|clinical outcome	L	P	S
NCT04347512	Azithromycin-Hydroxychloroquine Combination in Sars-CoV-2 Pneumonia Study	Rate of patients reaching a significant hypoxemia, in each arms.	L	P	S
NCT04344431	Management by Hyperbaric Oxygen Therapy of Patients With Hypoxaemic Pneumonia With SARS-CoV-2 (COVID-19)	Time to normalize the oxygen requirement (oxygeno-dependence)|Days of hospitalization between the HBO group and the control group.|Oxygen flow values to obtain a saturation by pulse oximetry greater than or equal to 92% values between the HBO group and the control group.|Days on invasive mechanical ventilation|Mortality	C	T	S
NCT04347954	PVP-I Nasal Sprays and SARS-CoV-2 Nasopharyngeal Titers (for COVID-19)	Mean change in viral titers of SARS-CoV-2|Frequency of adverse effects of interest after nasal sprays|Frequency of symptoms related to SARS-CoV-2	V	Q	S
NCT04346667	Post-Exposure Prophylaxis for Asymptomatic SARS-CoV-2 COVID-19 Patients With choloroquinE Compounds	RT-PCR negative status|Progression of symptoms|Development of Symptoms|Adverse events	V	P	S
NCT04345601	Mesenchymal Stromal Cells for the Treatment of SARS-CoV-2 Induced Acute Respiratory Failure (COVID-19 Disease)	Incidence of unexpected adverse events|Improved oxygen saturations ≥93%|Decrease in oxygen supplementation by non-invasive or invasive interventions|Frequency of progression to mechanical ventilation or ECMO|Duration of mechanical ventilation|Duration of ICU stay|Duration of hospital stay|All-cause mortality at day 28	C	P	T
NCT04343729	Methylprednisolone in the Treatment of Patients With Signs of Severe Acute Respiratory Syndrome in Covid-19	Mortality rate at day 28|Proportion of patients with SARS|Mortality rate on days 7, 14 and 28|Incidence of orotracheal intubation|Change in oxygenation index	M	P	H
NCT04341415	Impact of Auricular Vagus Nerve Neuromodulation on COVID-19 Positive Inpatients Outcome	Comparison of the percentage of clinically improved inpatients between D0 and D14	C	P	S
NCT04341207	Epidemiology of SARS-CoV-2 and Mortality to Covid19 Disease in French Cancer Patients	Prevalence and the 3-months incidence of SARS-CoV-2 in cancer patients|Covid-19 disease-specific mortality rate in cancer patients treated by hydroxychloroquine and azithromycin	V	P	P
NCT04344288	Corticosteroids During Covid-19 Viral Pneumonia Related to SARS-Cov-2 Infection	Number of patients with a theoretical respiratory indication for transfer to intensive care unit evaluated by a SpO2 <90% stabilized at rest and under not more than 5 L / min of supplemental oxygen using medium concentration mask.|disease severity assessed on a 7-level ordinal scale|number of patients with a supplemental oxygen use|radiological signs on chest imaging|number of patients transferre…	C	P	S
NCT04344951	Chloroquine Phosphate Against Infection by the Novel Coronavirus SARS-CoV-2 (COVID-19): The HOPE Open-Label, Non Randomized Clinical Trial	50% reduction in symptom score for patients with lower respiratory tract infection|Lack of progression for patients with upper respiratory tract infection|Comparison of the primary endpoint with respective patients not receiving the treatment|Serious respiratory failure until day 14. This will be compared with respective patients not receiving the treatment.|Frequency of AEs and SAEs	C	Q	S
NCT04350086	Use of Dexmedetomidine in Light to Moderate Sedation in the Patient in the Palliative Situation of a Sars-cov-2 / COVID-19 Infection	Efficacy of mild to moderate palliative sedation induced by Dexmedetomidine.|Overall survival of patients on Dexmedetomidine|Daily analgesic effect of Dexmedetomidine|Needs for other sedative pharmacological agents|Average dosage required for Dexmedetomidine to achieve mild to moderate sedation	C	Q	S
NCT04343144	Trial Evaluating Efficacy and Safety of Nivolumab (Optivo®) in Patients With COVID-19 Infection, Nested in the Corimmuno-19 Cohort.	Time to clinical improvement|Overall survival|Cumulative incidence of ICU admission|Length of hospital stay|Positive nasal PCR|Incidence of adverse events|Incidence of grade 3-4 adverse events|World Health Organisation (WHO) progression scale	C	T	S
NCT04347382	Efficacy of Nigella Sativa and Natural Honey Against COVID-19: an RCT	Days required to get a positive COVID-19 PCR to negative|HRCT/ X-ray findings of disease prgression|Severity of symptoms progression|Duration of Hospital Saty|30 day mortality|Oxygen Saturation at room air|Incidence of viral myocarditis|Incidence of Acute respiratory Distress Syndrome	V	T	S
NCT04345276	Efficacy and Safety of Ganovo (Danoprevir) Combined With Ritonavir in the Treatment of SARS-CoV-2 Infection	Rate of composite adverse outcomes|Time to recovery|Rate of no fever|Rate of no cough|Rate of no dyspnea|Rate of no requiring supplemental oxygen|Rate of undetectable New coronavirus pathogen nucleic acid|Rate of mechanical ventilation|Rate of ICU admission|Rate of serious adverse event	C	P	S
NCT04342650	Chloroquine Diphosphate in the Prevention of SARS in Covid-19 Infection	Proportion of patients with onset of severe acute respiratory syndrome (SARS)|Mortality rate|Number of participants in need of intensive care support|Viral concentration|Cumulative incidence of serious adverse events|Cumulative incidence of grade 3 and 4 adverse events|Proportion of patients with discontinued treatment|Incidence of cardiac lesions|Incidence of cardiac disfunctions|Change in respi…	C	P	S
NCT04345991	Efficacy of Convalescent Plasma to Treat COVID-19 Patients, a Nested Trial in the CORIMUNO-19 Cohort	Survival without needs of ventilator utilization or use of immunomodulatory drugs|WHO progression scale ≥6|Severe adverse events|WHO progression scale|Overall survival|Time from randomization to discharge|Time to oxygen supply independency|Survival without needs of ventilator utilization|Survival without use of immunomodulatory drugs	M	P	H
NCT04341870	Study of Immune Modulatory Drugs and Other Treatments in COVID-19 Patients: Sarilumab, Azithromycin, Hydroxychloroquine Trial - CORIMUNO-19 - VIRO	Need for ventilation (including invasive and non invasive ventilation), intensive care or death|Early improvement: OMS progression scale <= 5|OMS progression scale|Survival|ICU-free days alive|Ventilation-free days alive|Hospital-free days alive|Oxygen therapy-free days alive|Time to negative viral excretion|Immunophenotyping and multiplex cytokines	C	P	S
NCT04346797	CORIMUNO19-ECU: Trial Evaluating Efficacy and Safety of Eculizumab (Soliris) in Patients With COVID-19 Infection, Nested in the CORIMUNO-19 Cohort	Survival without needs of intubation at day 14|Change in organ failure at day 3|OMS progression scale ≤5 at day 4|OMS progression scale at days 4, 7 and 14|Survival at 14, 28 and 90 days|Time to discharge|Time to oxygen supply independency|Time to negative viral excretion|Incidence of secondary infections|Vasopressor-free survival|Ventilator-free survival|28-day ventilator-free days|Incidence of …	M	P	H
NCT04342182	Convalescent Plasma as Therapy for Covid-19 Severe SARS-CoV-2 Disease (CONCOVID Study)	Overall mortality until discharge from the hospital or a maximum of 60 days after admission whichever comes first|Impact of 250ml convP therapy on hospital days|Impact of 250ml convP on weaning from oxygen therapy|Impact of 250ml convP on overall mortality in patients admitted to the ICU within 24 hours after admission|Difference in the effect of convP on mortality in patients with a duration of …	M	P	H
NCT04341142	Assessment of Serological Techniques for Screening Patients Regarding COVID-19-COVID-SER	The positivity (Yes/No) of the serological test.	S	P	D
NCT04343261	Convalescent Plasma in the Treatment of COVID 19	Mortality|Viral Load|Serum Antibody Titers	M	P	H
NCT04348370	BCG Vaccine for Health Care Workers as Defense Against SARS-COV2	incidence (measured by confirmed positive test) of SARS-CoV2 infection following BCG vaccination compared to placebo|COVID19-related disease severity (measured by ordinal severity scale) following BCG vaccination compared to placebo	V	P	S
NCT04346277	Compassionate Use Open-Label Anti-CD14 Treatment in Patients With SARS-CoV-2 (COVID-19)		NA	NA	NA
NCT04348474	Efficacy and Safety of Hydroxychloroquine and Azithromycin for the Treatment of Ambulatory Patients With Mild COVID-19	Change in Clinical Condition|Hospitalization|Rate of mortality within 28-days|Change in Clinical Condition related to comorbidity	C	P	S
NCT04341727	Hydroxychloroquine,Hydroxychloroquine,Azithromycin in the Treatment of SARS CoV-2 Infection	Hours to recovery|Time fever resolution	C	T	S
NCT04343755	Convalescent Plasma as Treatment for Hospitalized Subjects With COVID-19 Infection	For patients hospitalized for COVID-19 but not intubated|Primary objective for patients with COVID-19 already intubated|Duration of hospitalization|Duration of mechanical ventilation|Time to symptoms resolution|Overall survival|Rate of virologic clearance by nasopharyngeal swab at day 10|Impact of donor titers level on efficacy|Impact of donor titers level on safety|Recipient Anti-SARS-CoV2 titer…	C	P	S
NCT04346017	Evaluation of Interleukine 6 (and Other Cytokines and Inflammatory Markers) in COVID-19 Patients With a Systemic Inflammatory Response Syndrome	IL6 concentration|IL6 concentration change from baseline value|Complement parameters|Complement parameters change from baseline values|Inflammatory cytokines baseline concentrations|Inflammatory cytokines change from baseline values|Concentration of markers of macrophage activation|Markers of macrophage activation change from baseline values	L	Q	D
NCT04343183	Hyperbaric Oxygen Therapy (HBOT) as a Treatment for COVID-19 (COVID-19) Infection	Decrease incidence of intubation by 30% or greater|Decrease renal injury	C	P	S
NCT04341441	Will Hydroxychloroquine Impede or Prevent COVID-19	Reduction in the number of COVID-19 infections in healthcare workers.	V	P	P
NCT04344457	Evaluate the Efficacy and Safety of Oral Hydroxychloroquine, Indomethacin and Zithromax in Subjects With Mild Symptoms of COVID-19	Improvement of clinical status|Time of clinical recovery of fever|Time of clinical recovery of cough|Safety as determined by changes in QTC intervals measured by ECG|Safety as determined by presence of side effects|Time to improvement	C	Q	S
NCT04345445	Study to Evaluate the Efficacy and Safety of Tocilizumab Versus Corticosteroids in Hospitalised COVID-19 Patients With High Risk of Progression	The proportion of patients requiring mechanical ventilation|Mean days of ventilation|The proportion of patients requiring ICU admission|Overall 28-day survival|Change in symptom severity assessed by the World Health Organization (WHO) Coronavirus Disease 2019 (COVID19) ordinal scale measured daily up to 7 days from baseline|Duration of hospital and ICU stay	C	P	S
NCT04345679	Anti COVID-19 Convalescent Plasma Therapy	Changing of viral load of SARS-CoV2|Changes in immunglobulin G COVID-19 antibody titer|Changes at the cytokine pattern|Intensive Care Unit Admission|Length of hospital stay|Duration of mechanical ventilation|Clinical Status|Mortality	V	Q	S
NCT04349098	Evaluation of Activity and Safety of Oral Selinexor in Participants With Severe COVID-19 Infection	Percentage of Participants with at Least a 2 Point Improvement in the Ordinal Scale|Time to Clinical Improvement (TTCI)|Number of Participants with Overall Death Rate|Number of Participants With Rate of Mechanical Ventilation|Time to Mechanical Ventilation|Overall survival|Time to Improvement (2 points) in Clinical Measures Using the Ordinal Scale|Time to Intensive Care Unit (ICU) Admission|Rate …	W	Q	H
NCT04345848	Preventing COVID-19 Complications With Low- and High-dose Anticoagulation	Composite outcome of arterial or venous thrombosis, disseminated intravascular coagulation and all-cause mortality|Arterial thrombosis|Venous thromboembolism|Disseminated intravascular coagulation|All-cause mortality|Sepsis-induced coagulopathy|Acute respiratory distress syndrome|Durations of hospital stay, ICU stay, ventilation|Sequential organ failure assessment score|Clinical deterioration	M	P	H
NCT04347915	The Randomized, Open, Phase 2 Study to Evaluate the Safety and Efficacy of Clevudine in Patients With Moderate COVID-19	The rate of subjects tested as negative SARS-Coronavirus-2 (SARS-CoV-2)|The rate of subjects tested as negative SARS-Coronavirus-2 (SARS-CoV-2) in consecutive two days of Real-Time RT-PCR tests|The rate of subjects indicated by the improvement of lung invasive|The change of viral load	V	P	S
NCT04348071	Safety and Efficacy of Ruxolitinib for COVID-19	Phase 2: Cumulative incidence of Grade 3 and 4 adverse events (AEs)|Phase 2: Cumulative incidence of serious adverse events (SAEs)|Phase 2: Changes in white blood cell count (CBC) through Day 15|Phase 2: Changes in hemoglobin through Day 15|Phase 2: Changes in platelets through Day 15|Phase 2: Changes in creatinine through Day 15|Phase 2: Changes in glucose through Day 15|Phase 2: Changes in prot…	C	P	T
NCT04342663	A Double-blind, Placebo-controlled Clinical Trial of Fluvoxamine for Symptomatic Individuals With COVID-19 Infection	Time to clinical worsening|clinical deterioration on a Likert-type scale (1-6)|clinical deterioration measured by number of days|Symptomatic severity on a likert scale (0-10 where 0= none and 10=very severe)	C	T	S
NCT04346147	Clinical Trial to Evaluate Efficacy of 3 Types of Treatment in Patients With Pneumonia by COVID-19	time to clinical improvement|Safety of treatments|Tolerability of treatments	C	T	S
NCT04348656	CONvalescent Plasma for Hospitalized Adults With COVID-19 Respiratory Illness (CONCOR-1)	Intubation or death in hospital|Intubation|Time to intubation|Ventilator-free days|In-hospital death|Time to in-hospital death|Death at 30 days|Length of stay in intensive care unit (ICU)|Length of stay in hospital|Need for extracorpeal membrane oxygenation (ECMO)|Need for renal replacement therapy|Myocarditis|Adverse events and serious adverse events|Transfusion-associated adverse events (AE)	M	P	H
NCT04348877	Plasma Rich Antibodies From Recovered Patients From COVID19	viral COVID-19 clearance|Decrease of radiological abnormalities|Clinical improvement	V	P	S
NCT04349241	Efficacy and Safety of Favipiravir in Management of COVID-19	Viral clearance|Clinical improvement|Radiological Improvement	V	P	S
NCT04342689	The Role of Resistant Potato Starch in COVID-19 Infection	Rates of hospitalization for a COVID-19 related complication|Time to clinical recovery (TTCR)|Symptom Severity Score	C	P	S
NCT04345523	Convalescent Plasma Therapy vs. SOC for the Treatment of COVID19 in Hospitalized Patients	Category Changes in Ordinal Scale|Time to category 5, 6 or 7 of the ordinal scale|Mortality of any cause at 15 days|Mortality of any cause at 29 days|Oxygenation free days|Ventilator free days|Incidence of Treatment-Emergent Adverse Events|Antibodies levels in CP donors recovered from COVID-19|Viral load	W	Q	H
NCT04341116	Study of TJ003234 (Anti-GM-CSF Monoclonal Antibody) in Subjects With Severe Coronavirus Disease 2019 (COVID-19)	Proportion (%) of subjects experiencing deterioration in clinical status|Treatment Emergent Adverse Events|Clinical status|Improvement in clinical status|Sequential Organ Failure Assessment (SOFA) score|Change from baseline in PaO2/ FiO2|Length of time to normalization of oxygen saturation|Change from baseline in percentage of subjects requiring mechanical ventilation|Change from baseline in Gluc…	C	P	S
NCT04344015	COVID-19 Plasma Collection	Number of patients who screen eligible for donation|Number of patients who consent to plasma donation|Number of plasma donations received|Safety of donation procedures	L	P	D
NCT04350073	Longitudinal Energy Expenditure and Metabolic Effects in Patients With COVID-19 (LEEP-COVID)	Metabolic and Nutritional Needs of COVID-19 Patients: Measured by Changes of Resting Energy expenditure(REE) over time, as measured by the indirect calorimetry Q-NRG device|Metabolic and Nutritional Needs of COVID-19 Patients:Changes of the Respiratory Exchange Ratio (RER) as measured by the indirect calorimetry Q-NRG device|Cardiac Output and Cardiac Measures (non-invasive) in COVID-19 patients|…	C	Q	S
NCT04346199	Acalabrutinib Study With Best Supportive Care Versus Best Supportive Care in Subjects Hospitalized With COVID-19. CALAVI (Calquence Against the Virus)	Treatment failure rate|Number of days alive free of assisted ventilation|Number of days with assisted ventilator use|Number of days hospitalized|Number of days in ICU|Number of days alive outside of hospital|Occurrence of Adverse Events and Serious Adverse Events|Pharmacokinetics of acalabrutinib and its active metabolite ACP-5862 (Cmax)|Pharmacokinetics of acalabrutinib and its active metabolite…	M	P	H
NCT04343768	An Investigation Into Beneficial Effects of Interferon Beta 1a, Compared to Interferon Beta 1b And The Base Therapeutic Regiment in Moderate to Severe COVID-19: A Randomized Clinical Trial	Time to clinical improvement|Mortality|SpO2 Improvement|Incidence of new mechanical ventilation use|Duration of hospitalization|Cumulative incidence of serious adverse events	C	T	S
NCT04346368	Bone Marrow-Derived Mesenchymal Stem Cell Treatment for Severe Patients With Coronavirus Disease 2019 (COVID-19)	Changes of oxygenation index (PaO2/FiO2)|Side effects in the BM-MSCs treatment group|Clinical outcome|Hospital stay|CT Scan|Changes in viral load|Changes of CD4+, CD8+ cells count and concentration of cytokines|Rate of mortality within 28-days|Changes of C-reactive protein	L	Q	S
NCT04344587	COVID-19 smArtphone-based Trial of Non-ICU Admission Prone Positioning	Change in respiratory status|Length of time participant spends in the prone position|Length of time participant spends in the supine position|Length of time participant spends lying on side|Length of time participant spends sitting up|Length of time participant spends standing or walking|Dyspnea or difficult/labored breathing|Discomfort with proning|Length of hospital stay|Invasive mechanical ven…	C	Q	S
NCT04341688	A Clinical Trial of Gargling Agents in Reducing Intraoral Viral Load Among COVID-19 Patients	Intraoral viral load|Salivary cytokine profile	V	Q	S
NCT04343677	Military COVID-19 Hydroxychloroquine Pre-exposure and Post-exposure Prophylaxis Study	Incidence|Severity of Disease	V	P	P
NCT04343690	COPING With COVID-19( CWC-19)	Change in stress level as measured by survey|Change wellness as measured by survey	O	Q	O
NCT04347538	Impact of Nasal Saline Irrigations on Viral Load in Patients With COVID-19	Change in SARS-CoV-2 mucosal immune response in the nasopharynx|Change in microbial load in the nasopharynx|Change in Viral Load in the nasopharynx over the course of COVID-19 infection|Symptom assessment|Temperature assessment	L	Q	S
NCT04341675	Sirolimus Treatment in Hospitalized Patients With COVID-19 Pneumonia	Progression to advanced respiratory support	C	P	S
NCT04348695	Study of Ruxolitinib Plus Simvastatin in the Prevention and Treatment of Respiratory Failure of COVID-19.	Percentage of patients who develop severe respiratory failure.|Length of ICU stay.|Length of hospital stay|Survival rate at 6 months|Survival rate at 12 months|Survival rate at 28 days|Percentage of patients with each AE by grade|Percentage of patients who discontinued due to AEs	C	P	H
NCT04343092	Ivermectin Adjuvant to Hydroxychloroquin in COVID19 Patients	Number of cured patients|Number of participants with treatment-related adverse events	V	P	S
NCT04343001	Coronavirus Response - Active Support for Hospitalised Covid-19 Patients	Death|Myocardial infarction|Congestive cardiac failure|Severe cardiac arrythmia|Myocarditis|Respiratory failure including ARDS|Viral pneumonitis|Acute renal failure|Sepsis|Stroke|Gastrointestinal bleeding|Receipt of non invasive or mechanical ventilation|Ability to self care at hospital discharge	M	P	H
NCT04343794	Using Biovitals® Sentinel to Monitor Disease Progression in Subjects Quarantined for Suspected COVID-19	Time to diagnosis of COVID-19 by RT-PCR in subjects|Compliance to complete the study|Sensitivity and specificity of Biovitals® Sentinel|Cross infection rate within the family cluster|Length of hospital stay of positive subjects|Length of ICU stay of positive patients|National Early Warning Score 2 rating of positive patients|Viral load of positive patients|Worsening of comorbidities|Mortality	V	T	P
NCT04347174	A Clinical Trial of Mycobacterium w in Critically Ill COVID 19 Patients	SOFA scores|Ordinal scale|All-cause mortality|Incidence of AE / SAE or event of clinical significance|SARS-CoV-2 detectable in nasal or oropharyngeal (OP) sample|ICU length of stay|Duration of mechanical ventilation|Duration of hospitalization|Clinical improvement|Time (in days) from treatment initiation to death	C	Q	S
NCT04348500	Clazakizumab (Anti-IL- 6 Monoclonal) Compared to Placebo for COVID19 Disease	Evaluate the safety and efficacy of clazakizumab for the treatment of patients with COVID-19 disease and signs of pulmonary involvement|Patient survival at 28 days|Patient survival at 60 days|Number of patients requiring the dose of open-label clazakizumab|Reduced duration of intensive care unit stay|Reduced duration of hospital stay	C	P	T
NCT04344444	Treatment in Patients With Suspected or Confirmed COVID-19 With Early Moderate or Severe Disease	Most severe outcome	M	P	H
NCT04344080	Effect of CytoSorb Adsorber on Hemodynamic and Immunological Parameters in Critical Ill Patients With COVID-19	Percentage of patients with a significant stabilization of hemodynamics for at least 24 hours|Change in organ dysfunction|Lactate clearance|Renal replacement therapy|Extracorporeal Membrane Oxygenation|ICU length of stay|Time on mechanical ventilation|Cumulative catecholamine dose|Overall and ICU mortality|Change of plasma Interleukin-6 (IL6) level|Change of plasma Interleukin-10 (IL10) level|Cha…	C	P	S
NCT04346615	Safety and Efficacy Trial of Vazegepant Intranasal for Hospitalized Patients With COVID-19 Requiring Supplemental Oxygen	To evaluate the safety and efficacy of vazegepant compared with placebo in patients hospitalized with COVID-19 infection requiring supplemental oxygen.|The number of unique subjects alive and off of oxygen. These are subjects in categories 5 or 6 of the 6-point ordinal scale being used as the primary endpoint.|A subject requiring initiation of mechanical ventilation, non-invasive ventilation, or …	C	P	T
NCT04344236	Gargling and Nasal Rinses to Reduce Oro- and Nasopharyngeal Viral Load in Patients With COVID-19	Viral load (and/or cycle time to PCR as a proxy for quantitative viral load) in the nasopharynx and oropharynx|Oxygen requirement of the patient|Oxygen saturation of the patient	V	Q	S
NCT04345692	A Randomized Controlled Clinical Trial: Hydroxychloroquine for the Treatment of COVID-19 in Hospitalized Patients	i. Clinical status|Oxygenation|Mechanical Ventilation|Hospitalization|Mortality	W	Q	H
NCT04348435	A Randomized, Double-Blind, Single Center, Efficacy and Safety Study of Allogeneic HB-adMSCs to Provide Immune Support Against COVID-19	Incidence of hospitalization for COVID-19|Incidence of symptoms associated with COVID-19|Absence of upper/lower respiratory infection|Leukocyte differential|C Reactive protein|TNF alpha|IL-6|IL-10|Glucose|Calcium|Albumin|Total protein|Sodium|Total carbon dioxide|Potassium|Chloride|BUN|Creatinine|Alkaline phosphatase|Alanine aminotransferase|Total bilirubin|white blood cells|red blood cells|hemogl…	C	P	S
NCT04348383	Defibotide as Prevention and Treatment of Respiratory Distress and Cytokine Release Syndrome of Covid 19.	1. Mortality rate|Clinical improvement by WHO|Clinical improvement by NEWS2 scales|Biologic response|Radiological response|Collection and storage of biological samples	M	P	H
NCT04348409	Efficacy and Safety of Nitazoxanide for the Treatment of Hospitalized Patients With Moderate COVID-19	Viral load|Evolution of acute respiratory syndrome|Change in Clinical Condition|Hospital discharge|Rate of mortality within 21-days|Need of mechanical ventilation	V	Q	S
NCT04343989	A Randomized Placebo-controlled Safety and Dose-finding Study for the Use of the IL-6 Inhibitor Clazakizumab in Patients With Life-threatening COVID-19 Infection	Incidence of serious adverse events associated with clazakizumab or placebo|Incidence of intubation|Time to extubation|Length of ICU stay|Number of patients who present a decrease in C-reactive protein|Patient survival	C	P	T
NCT04349228	Assessment of the Efficacy and Safety of (HCQ) as a Prophylaxis for COVID19 for Health Professionals	Symptomatic COVID(+) infection rate	V	P	P
NCT04349410	The Fleming [FMTVDM] Directed CoVid-19 Treatment Protocol	Improvement in FMTVDM Measurement with nuclear imaging.|Ventilator status|Survival status	R	Q	S
NCT04341493	Hydroxychloroquine vs Nitazoxanide in Patients With COVID-19	Mechanical ventilation requirement	C	P	S
NCT04341935	Effects of DPP4 Inhibition on COVID-19	Changes in Glucose Llevels|Changes in SpO2 levels|Changes in Interleukin 6 (IL6)|Changes in chest structures	L	Q	S
NCT04346355	Efficacy of Early Administration of Tocilizumab in COVID-19 Patients	Entry into Intensive Care with invasive mechanical ventilation or death from any cause or clinical aggravation|Death from any cause|Tocilizumab toxicity|Levels of interleukin-6 and C-reactive protein (CRP) and their correlation with the effectiveness of the treatment|Evaluate the progress of the PaO2 / FiO2 ratio|Evaluate the trend over time of the lymphocyte count	M	P	H
NCT04341389	A Phase II Clinical Trial to Evaluate the Recombinant Vaccine for COVID-19 (Adenovirus Vector)	Occurrence of adverse reactions|Anti SARS-CoV-2 S antibody response(ELISA)|Neutralizing antibody response to SARS-CoV-2|Occurrence of adverse events|Occurrence of serious adverse reaction|Neutralizing antibody response to Ad5-vector	C	P	T
NCT04344756	Trial Evaluating Efficacy and Safety of Anticoagulation in Patients With COVID-19 Infection, Nested in the Corimmuno-19 Cohort	Survival without ventilation (VNI or mechanical ventilation)|ventilator free survival|World Health Organisation(WHO) progression scale ≤5|World Health Organisation(WHO) progression scale|overall survival|Length of hospital stay|Length of ICU stay|time to oxygenation supply independency|time to ventilator (non invasive or invasive)|rate of acute kidney injury|time to Renal Replacement Therapy (RRT…	M	P	H
NCT04344782	Trial Evaluating Efficacy and Safety of Bevacizumab (Avastin®/Zeribev®) in Patients With COVID-19 Infection, Nested in the Corimmuno-19 Cohort	Proportion of surviving patients without need for intubation for respiratory support|Saturation of Oxygen in the blood (SaO2)|Arterial oxygen partial pressure (paO2)|Ratio of arterial oxygen partial pressure to fractional inspired oxygen (paO2/FiO2)|CT-scan score|dyspnea|overall survival|admissionn to the intensive care unit (ICU)|incidence of mechanical ventilation|hospital length of stay|incide…	M	P	H
NCT04347226	Anti-Interleukin-8 (Anti-IL-8) for Cancer Patients With COVID-19	Time to Improvement in the 7-point ordinal scale|Time to Death|Time to Intubation|Proportion of patients requiring ICU admission|Mortality at 1 month	W	T	H
NCT04342221	Hydroxychloroquine for COVID-19	Effect of HCQ on in vivo viral clearance	V	T	S
NCT04344730	Dexamethasone and Oxygen Support Strategies in ICU Patients With Covid-19 Pneumonia	The time-to-death from all causes|The time to need for mechanical ventilation (MV)|The viral load in the respiratory tract|Number of patient with at least one episode of healthcare-associated infections|Number of days alive without mechanical ventilation|Measure of SOFA score|Number of days alive without renal replacement therapy|Lengths of ICU-stay|Lengths of hospital-stay|Number of patients wit…	M	T	H
NCT04342897	A Study of LY3127804 in Participants With COVID-19	Number of Ventilator Free Days|Number of Participants Reporting Each Severity Rating on the National Institute of Allergy and Infectious Diseases (NIAID) Ordinal Assessment|Oxygen Saturation (SpO₂)|Oxygen Flow Rate|Mortality|Length of Hospitalization|Number of Participants with any Serious Adverse Event (SAE)|Number of Participants with any Treatment Emergent Adverse Event (TEAE)	C	T	S
NCT04343248	Trial to Evaluate the Efficacy and Safety of Nitazoxanide (NTZ) for Post-Exposure Prophylaxis of COVID-19 and Other Viral Respiratory Illnesses in Elderly Residents of Long-Term Care Facilities (LTCF)	Symptomatic laboratory-confirmed COVID-19|Symptomatic laboratory-confirmed VRI	V	P	P
NCT04342156	Safety And Efficacy Of Hydroxychloroquine As COVID-19 Prophylaxis For At-Risk Population (SHARP): A Cluster Randomized Controlled Trial	positive serology or reverse transcriptase (RT-PCR) for COVID-19 up until day 28.	S	P	P
NCT04348513	Triiodothyronine for the Treatment of Critically Ill Patients With COVID-19 Infection	Assessment of weaning from cardiorespiratory support|Assessment of hemodynamic status|Assessment of pulmonary function|Assessment of hepatic function|Assessment of renal function|Assessment of cardiac function|Assessment of cardiac injury|Assessment of the course of COVID-19 infection|Assessment of clinical outcome and safety	C	P	S
NCT04349618	Ultraprotective Ventilation Without Extracorporeal Circulation During COVID 19 Pneumonia	A composite score based on all-cause mortality and the number of ventilator free-days (VFD)|All-cause mortality (intention to treat)|Ventilator-free days (VFD)|All-cause mortality with per protocol analysis|Time to successful extubation|Length of hospital stay|Respiratory parameters assessed daily from inclusion to weaning of deep sedation or 14 days whichever comes first|Daily sedation dose duri…	M	Q	H
NCT04347681	Potential Efficacy of Convalescent Plasma to Treat Severe COVID-19 and Patients at High Risk of Developing Severe COVID-19	ICU length of stay|Safety of convalescent plasma & Serious adverse reactions.|Number of days on mechanical ventilation|30 days of mortality|Days to clinical recovery .	C	T	H
NCT04345861	Hydroxychloroquine Plus Azithromycin Versus Hydroxychloroquine for COVID-19 Pneumonia (COVIDOC Trial)	Time to clinical improvement of at least 1 level on the ordinal scale between Day 1 (day of the first administration of study drug) to Day 11 (day after last day of treatment).|Clinical status assessed by ordinal scale|transfer to ICU|Length of hospital day|Hospital Mortality|Need to Mechanical Ventilation|Occurence of grade 3-4 adverse event|QTc Lengthening|Evolution of pulmonary CT scan images	W	T	H
NCT04345653	Hydroxychloroquine as Chemoprevention for COVID-19 for High Risk Healthcare Workers	Recruitment Feasibility|Recourse utilization|Safety as reflected on the number and severity of adverse events and serious adverse events|Early feasibility as reflected on the number of participants contracting COVID-19 (10% or less) in comparison to the expected 30% as per CDC.|Effect of basic inflammatory regulation	C	P	P
NCT04346589	Convalescent Antibodies Infusion in Critically Ill COVID 19 Patients	Number of mechanical ventilation days.|Survival|Shift to Continuous Positive Airway Pressure (CPAP) ventilation|Referral to a sub-intensive care unit or discharge	C	T	S
NCT04348305	Hydrocortisone for COVID-19 and Severe Hypoxia	Days alive without life support at day 28|All-cause mortality at day 28|Days alive without life support at day 90|All-cause mortality at day 90|Number of participants with one or more serious adverse reactions|Days alive and out of hospital at day 90|All-cause mortality at 1 year after randomisation|Health-related quality of life at 1 year	C	T	H
NCT04346693	An Open Randomized Study of Dalargin Effectiveness in Patients With Severe and Critical Manifestations of SARS-COVID-19	The change of viral load in patients with SARS-COVID-19.|The frequency of development of Acute Respiratory Distress Syndrome (ADRS)|Duration of hospitalization|The frequency of early mortality|The frequency of late mortality|Clinical status at the time of completion of participation in the study	V	Q	S
NCT04343976	Pegylated Interferon Lambda Treatment for COVID-19	Undetectable COVID PCR at day 7|Undetectable COVID PCR at day 3, 10 and 14|Percentage of subjects on Lambda vs standard of care with symptomatic improvement|Percentage of subjects on Lambda vs standard of care with improved clinical outcomes	V	P	S
NCT04341584	CORIMUNO-ANA: Trial Evaluating Efficacy Of Anakinra In Patients With Covid-19 Infection	Survival without needs of ventilator utilization at day 14|WHO progression scale ≤ 5|Cumulative incidence of successful tracheal extubation (defined as duration extubation > 48h) or withdrawal of NIV or high flow (for > 48h), at day 14|Decrease of at least one point in WHO progression scale score|WHO progression scale|Survival|28-day ventilator free-days|Respiratory acidosis|PaO2/FiO2 ratio|Time …	M	P	H
NCT04341285	Early Versus Late ECMO Therapy in COVID-19 Induced ARDS (ECMO-VID)	28 day all cause mortality|90 day all cause mortality|Sepsis-related organ failure assessment score at day 1-14, 28 and 90 days|duration of mechanical ventilation support|Ventilator Associated Pneumonia|Bleeding complications|Acute Renal Failure|Discharge Location	M	P	H
NCT04344106	Prone Positioning in Spontaneously Breathing Nonintubated Covid-19 Patient: a Pilot Study	Proportion of responder patients to prone position|proportion of persistent responders patients after prone position|Evolution of PaO2|Duration of prone positioning and PaO2 evolution|Evolution of Spo2|EVA Dyspnea|Intolerance to prone positioning|Tolerance to prone positioning	C	P	S
NCT04341038	Clinical Trial to Evaluate Methylprednisolone Pulses and Tacrolimus in Patients With COVID-19 Lung Injury	Time to reach clinical stability|Time to reach an afebrile state for 48 hours.|Time to reach PaO2 / FiO2> 400 and / or SatO2 / FiO2> 300|Time to reach FR ≤ 24 rpm for 48 hours|Time to normalization of D-dimer (<250 ug / L)|Time until PCR normalization (<5mg / L).|Time until normalization of ferritin (<400ug / L)|Study the impact of immunosuppressive treatment on viral load using quantitative PCR|…	C	T	S
NCT04349631	A Clinical Trial to Determine the Safety and Efficacy of Hope Biosciences Autologous Mesenchymal Stem Cell Therapy (HB-adMSCs) to Provide Protection Against COVID-19	Incidence of hospitalization for COVID-19|Incidence of symptoms for COVID-19|absence of upper/lower respiratory infection|Glucose|Calcium|Albumin|Total Protein|Sodium|Total carbon dioxide|Potassium|Chloride|BUN|Creatinine|Alkaline phosphatase|Alanine aminotransferase|Aspartate aminotransferase|Total bilirubin|White blood cells|Red blood cells|Hemoglobin|Hematocrit|Mean corpuscular volume|Mean cor…	C	P	S
NCT04342169	University of Utah COVID-19 Hydrochloroquine Trial	Duration of viral shedding|Duration of COVID-19-attributable symptoms|Hospitalization|Adult household contact viral acquisition	V	T	S
NCT04343651	Study to Evaluate the Efficacy and Safety of Leronlimab for Mild to Moderate COVID-19	Clinical Improvement as assessed by change in total symptom score (for fever, myalgia, dyspnea and cough)|Time to clinical resolution (TTCR)|Change from baseline in National Early Warning Score 2 (NEWS2)|Change from baseline in pulse oxygen saturation (SpO2)|Change from baseline in the patient's health status on a 7-category ordinal scale|Incidence of hospitalization|Duration (days) of hospitaliz…	C	Q	S
NCT04347239	Study to Evaluate the Efficacy and Safety of Leronlimab for Patients With Severe or Critical Coronavirus Disease 2019 (COVID-19)	All-cause mortality at Day 28|All-cause mortality at Day 14|Change in clinical status of subject at Day 14 (on a 7 point ordinal scale)|Change in clinical status of subject at Day 28 (on a 7 point ordinal scale)|Change from baseline in Sequential Organ Failure Assessment (SOFA) score at Day 14.	M	P	H
NCT04347941	Awake Prone Positioning to Reduce Invasive VEntilation in COVID-19 Induced Acute Respiratory failurE	The effect of prone positioning on requirement for invasive mechanical ventilation in patients with COVID 19 induced respiratory failure.|Length of time tolerating prone positioning|PaO2/FiO2 measured before prone positioning|PaO2/FiO2 ratio after 1 hours of prone positioning|SpO2/FiO2 ratio measured before prone positioning|SpO2/FiO2 ratio after 1 hours of prone positioning|Number requiring incr…	C	Q	S
NCT04345289	Efficacy and Safety of Novel Treatment Options for Adults With COVID-19 Pneumonia	All-cause mortality or need of invasive mechanical ventilation|Frequency of adverse events|Frequency of severe adverse events|Time to improvement of at least 2 categories relative to baseline on a 7-category ordinal scale of clinical status|Ventilator-free days|Organ failure-free days|Duration of ICU stay|Mortality rate|Length of hospital stay|Duration of supplemental oxygen	M	P	H
NCT04348864	COVID-19 Antibody Self-testing Using Virtual Point-of-care	Clinical accuracy of the antibody-based rapid tests compared to PCR-based test result|Clinical accuracy of the rapid tests based on Clinical diagnosis|Self-test interpretation of result vs expert clinical image interpretation of result|Ease of self-testing procedure	S	P	D
NCT04347980	Dexamethasone Treatment for Severe Acute Respiratory Distress Syndrome	Day-28 mortality|Ventilator-free days|Intensive Care Unit mortality|Day-60 mortality|Nosocomial pneumonia|Bacteremia	M	P	H
NCT04344184	Early Infusion of Vitamin C for Treatment of Novel COVID-19 Acute Lung Injury (EVICT-CORONA-ALI)	Number of ventilator-free days|All-cause-mortality|Acute-inflammation-free days|Organ-failure-free days	M	T	H
NCT04349592	Qatar Prospective RCT Of Therapy Eliminating Covid Transmission	Proportion of virologically cured (no virus detected) cases at day 6|The dichotomous virologic shedding endpoint as assessed at two weeks after study entry|Quantitative viral load (assessed with each virology testing set)	V	P	S
NCT04347889	Prophylactic Hydroxychloroquine vs Vitamin C in Healthcare Workers:RCT	COVID-19 Seroconversion rate|Admission for Covid-19	V	P	P
NCT04344535	Convalescent Plasma vs. Standard Plasma for COVID-19	28 day ventilator free days|90 day all-cause mortality	M	T	H
NCT04344041	COvid-19 and Vitamin D Supplementation: a Multicenter Randomized Controlled Trial of High Dose Versus Standard Dose Vitamin D3 in High-risk COVID-19 Patients (CoVitTrial)	Number of death of any cause, during the 14 days following the inclusion and intervention.|Number of death of any cause, during the 28 days following the inclusion and intervention.|Clinical evolution between day 0 and day 14 based on the change of the WHO Ordinal Scale for Clinical Improvement (OSCI) for COVID-19|Clinical evolution between day 0 and day 28 based on the change of the OSCI for COV…	M	P	H
NCT04346953	Video-Based Exercise for Individuals With Social Isolation Due to Coronavirus (COVID-19)	International Physical Activity Questionnaire - Short Form|Nottingham Health Profile|Beck Depression Inventory|Beck Anxiety Inventory|Pittsburgh Sleep Quality Index|Timed Get Up and Go Test|Flamingo Balance Test	O	Q	O
NCT04346329	Immune Monitoring of Prophylactic Effect of Hydroxychloroquine in Healthcare Providers Highly Exposed to COVID-19	Adverse effects|Immune-score|COVID-19 prevention|Clinical response	C	P	T
ACTRN12620000468921	Effect of a Brief Problem Management Intervention on Covid 19-Related Anxiety and Depression	Anxiety and depression represent a composite primary outcome, as measured by the Hospital Anxiety and Depression scale.[Pretreatment (week 1), posttreatment (week 7), primary follow-up (week 15). ]	O	Q	O
ACTRN12620000470998	Virucidal pilot study of Nasodine® Antiseptic Nasal Spray (povidone-iodine 0.5%) in people with COVID-19 and confirmed nasal shedding of SARS-CoV-2 virus.	Impact of Nasodine on the reduction in virus in the nasal passages of subjects who are shedding the virus. Virus concentration is measured by PCR analysis of cell culture medium 96 hours after inoculation with a post-treatment nasal swab and compared to an equivalent culture inoculated with swab collected prior to treatment.[Endpoint is swab taken 5 minutes after dosing and compared against a swa…	V	Q	S
ChiCTR2000031834	A clinical study for the effect of remote monitoring exercise rehabilitation on the discharged patients with novel coronavirus pneumonia (COVID-19)	Total distances of 6 minutes walk test;	O	Q	O
ChiCTR2000031781	A randomized, double-blinded, placebo-controlled phase II clinical trial for Recombinant Novel Coronavirus (2019-nCOV) Vaccine (Adenovirus Vector)	Adverse reactions 0-14 days post vaccination;Anti-S antibody IgG titer on day 28 post vaccination;Anti-SARS-CoV-2 neutralizing antibody titer on day 28 post vaccination;	C	P	T
NCT04320953	Non-contact Endoscopy at Covid-19 Outbreak		O	P	O
NCT04341610	ASC Therapy for Patients With Severe Respiratory COVID-19	Changes in clinical critical treatment index	M	Q	H
NCT04342728	COVID-19 Using Ascorbic Acid and Zinc Supplementation	Symptom Reduction	C	Q	S
ISRCTN15281137	A phase I/II study to determine efficacy, safety and immunogenicity of the candidate coronavirus disease (COVID-19) vaccine ChAdOx1 nCoV-19 in UK healthy adult volunteers	<br> 1. Efficacy of candidate vaccine measured by virologically confirmed (PCR positive) symptomatic cases of COVID-19 over the course of 6 months<br> 2. Safety of candidate vaccine measured by the occurrence of serious adverse events (SAEs) over the course of 6 months<br>	V	P	S
ChiCTR2000031772	Impact of WeChat-based parenting education for children with autism spectrum disorder and their mothers during the epidemic of Coronavirus disease 2019 (COVID-19)	Psycho Educational Profile,PEP;Self-Rated Anxiety Scale,SAS;Self-Rated Depression Scale,SDS;Parenting Stress Index-Short Form,PSI-SF;	O	Q	O
NCT04341922	A Online-delivered Cognitive-behavioral Intervention for Dysfunctional Worry Related to the Covid-19 Pandemic	The self-rated Generalized Anxiety Disorder Scale-7 (GAD-7)	O	Q	O
ChiCTR2000031672	Development and application of TCM body regulating protection scheme for the convalescent population of novel coronavirus pneumonia (COVID-19)	Lung CT Score;	R	Q	S
EUCTR2020-001250-21-FR	COVID-19 - Epidemiology of SARS-CoV-2 and Mortality to Covid19 Disease upon Hydroxychloroquine and Azithromycin Therapy in French Cancer patients	Main Objective: To determine the prevalence and the 3-months incidence of SARS-CoV-2 in cancer patients (Part A).<br>To evaluate the Covid-19 disease mortality rate in cancer patients treated by hydroxychloroquine and azithromycin (Part B).<br>;Secondary Objective: To evaluate the safety, Covid-19 disease severity, response to cancer treatment, Progression-free survival (PFS), cancer mortality, a…	V	P	P
ChiCTR2000031735	Clinical study for natural killer (NK) cells from umbilical cord blood in the treatment of novel coronavirus pneumonia (COVID-19)	Monitoring of adverse events within 24 hours after infusion (including infusion related events and severe adverse reactions associated with non-primary disease);	C	P	T
ChiCTR2000031734	Evaluation Danorevir sodium tablets combined with ritonavir in the treatment of novel Coronavirus Pneumonia (COVID-19): a randomized, open-label, controlled trial	Rate of composite advers outcomes: SpO2, PaO2/FiO2, respiratory rate;	C	P	S
EUCTR2020-001381-11-FR	COVID-19 - ACORES-2 study: ACE inhibitors or ARBs discontinuation for Clinical Outcome Risk reduction in patients hospitalized for the Endemic Severe acute respiratory syndrome coronavirus (SARS-CoV-2) infection	Main Objective: To compare the effect of discontinuation versus continuation of RAS blockers on the clinical course of patients with confirmed COVID-19 infection leading to hospitalization;Secondary Objective: 1. Evaluate the cardiovascular safety of RAS blockers discontinuation in patients hospitalized for COVID-19 by a composite endpoint of MACE.<br>2. Evaluate the efficacy of RAS blockers disc…	W	Q	H
ACTRN12620000457943	Hydroxychloroquine for the Community-Based Treatment of COVID-19	Efficacy of Hydroxychloroquine in the community-based management of COVID-19 assessed by the mean daily InFLUenza Patient-Reported Outcome (FLU-PRO) illness severity score[Day 5 of treatment administration]	C	Q	S
EUCTR2020-001310-38-DE	Clinical Study to assess positive value of blood plasma from donors having built immunity against the new corona virus (SARS-CoV-2) transfused to patients suffering from SARS-CoV-2 infection	Main Objective: To improve survival <br><br>AND<br><br>remove criteria of severe COVID-19 (CoV-2 infection) within 21 days after randomization;Secondary Objective: - Time to clinical improvement on WHO R&D Blueprint seven-category ordinal scale by 2 <br>- Adverse events <br>- Case fatality rate on days 21, 35 and 60<br>- Length of hospital stay<br>- Length of ICU stay <br>- Duration of ventilatio…	W	Q	H
EUCTR2020-001435-27-FR	Home treatment of elderly patients with symptomatic SARS-CoV-2 infection (COVID-19) : a multiarm, multi-stage (MAMS) randomized trial to assess the efficacy and safety of several experimental treatments to reduce the risk of hospitalization or death (COVERAGE trial)	Main Objective: The main objective of this trial is To estimate the efficacy of several specific experimental treatments, compared to standard care, to prevent hospitalization or death at D14 in adults over 65 years of age, with documented SARS-CoV-2 infection, with symptoms lasting less than 72 hours and not meeting any hospitalization criteria.;Secondary Objective: To estimate :<br>- the effect…	C	P	P
EUCTR2020-001333-13-FR	Dexamethasone associated with hydroxychloroquine vs. hydroxychloroquine alone for the early treatment of severe ARDS caused by COVID-19 : a randomized controlled trial	Main Objective: Assess, in patients with ARDS caused by COVID-19, the efficacy of dexamethasone (DXM) associated with hydroxychloroquine (HCQ) compared to HCQ alone on mortality at 28 days;Secondary Objective: Assess, in patients with ARDS causedd by COVID-19, the efficacy of DXM associated with HCQ compared to HCQ alone on :<br>- the ventilator-free days<br>- mortality in intensive care unit<br>…	M	P	H
ACTRN12620000454976	Can intravenous high dose zinc improve clinical outcomes in patients with COVID-19 infection?	In non-ventilated patients- Mean change in the worst (highest) level of oxygenation (oxygen flow in litres/min). This will be assessed by the nursing documentation in the participant's electronic record of the flow rate of oxygen delivered and the delivery method (ie nasal prongs, Hudson mask, or non-breather mask). <br>In ventilated patients- Mean change in the worst (lowest) PaO2 /FiO2 ratio (i…	C	Q	S
ISRCTN43900695	Testing an early online intervention for the treatment of disturbed sleep during the COVID-19 pandemic	Insomnia severity measured using the Insomnia Severity Index at one week post-intervention	O	Q	O
EUCTR2020-001366-11-ES	An international randomised trial of additional treatments for COVID-19 in hospitalised patients who are all receiving the local standard of care	Main Objective: The aim of this core protocol is to compare the effects on major outcomes in hospital of the local standard of care alone versus the local standard of care plus one of four alternative anti-viral agents. <br><br>The primary objective of this large international randomised trial is to provide reliable estimates on any effects of these anti-viral treatments on in-hospital mortality …	M	P	H
EUCTR2020-001409-21-ES	DEFIBROTIDE AS PREVENTION AND TREATMENT OF RESPIRATORY DISTRESS AND CYTOKINE RELEASE SYNDROME OF COVID-19	Main Objective: To determine the efficacy of the intravenous infusion of Defibrotide (Defitelio) to reduce mortality in patients with SARS-CoV-2 infection with clinical status grade 4, 5 or 6 according to the WHO classification.;Secondary Objective: To assess the safety of intravenous Defibrotide (Defitelio) infusion in patients with SARS-CoV-2 infection with clinical status grade 4, 5 or 6 accor…	W	Q	H
EUCTR2020-001421-31-ES	Clinical trial for evaluation of efficacy and safety of hydroxychloroquine chemoprophylaxis against SARS-CoV-2 (COVID-19) infection in healthcare professionals.	Main Objective: To assess the efficacy of hydroxychloroquine as chemoprophylaxis against SARS-CoV-2 (COVID-19) infection in healthcare professionals by negative PCR.;Secondary Objective: To assess the safety of hydroxychloroquine as chemoprophylaxis against SARS-CoV-2 (COVID-19) infection in healthcare professionals.<br><br>To assess the efficacy of personal protective equipment against SARS-CoV-…	V	P	P
EUCTR2020-001606-33-ES	Randomized clinical trial to evaluate the efficacy of hydroxychloroquine associated or not with azithromycin as a treatment for COVID-19 infection	Main Objective: Demonstrate the therapeutic effectiveness of Hydroxychloroquine associated with Azithromycin treatment for symptom control and negative viral load, in patients with comorbidities without pneumonia and COVID-19 infection.;Secondary Objective: - Evaluate the safety of the treatment<br>- Assess tolerance of treatment;Primary end point(s): Proportion of patients with negative viral lo…	C	P	S
EUCTR2020-001492-33-FR	Interest in the administration of Dornase alpha aerosol in Acute Respiratory Distress Syndrome secondary to respiratory infection by the coronavirus SRASCoV-2 / COVID-19	Main Objective: To evaluate the efficacy of intratracheal administration of dornase alfa (Pulmozyme) on the evolution of ventilatory parameters at D7;Secondary Objective: 1) all-cause mortality at D28<br>2) the clinical evolution at D28 ;<br>3) the duration of mechanical ventilation;<br>4) the number of days without mechanical ventilation at D28;<br>5) the length of stay in intensive care ;<br>6)…	M	P	H
EUCTR2020-001194-69-ES	Pilot study to evaluate the efficacy and safety of mefloquine as prophylaxis in people exposed to the disease caused by the new SARS-CoV-2 coronavirus (COVID-19)	Main Objective: To determine the protective efficacy of mefloquine prophylaxis against placebo in close contacts of people with COVID-19.;Secondary Objective: -Establish if the preventive administration of mefloquine attenuates the clinical manifestations of COVID-19 in people who become infected.<br>-Evaluate the safety of prophylactic mefloquine in this setting.;Primary end point(s): COVID-19 i…	V	P	P
EUCTR2020-001565-37-ES	Prevention of novel Coronavirus infection with hydroxychloroquine	Main Objective: To compare the efficacy of the use of PrEP with hydroxychloroquine against placebo in healthcare workers with high risk of SARS-CoV-2 infection in reducing their risk of COVID-19 disease during an epidemic period.;Secondary Objective: 1) To assess the efficacy of the use of PrEP with hydroxychloroquine against placebo in healthcare workers with high risk of SARS-CoV-2 infection in…	V	P	P
NL8504	Pre-emptive tocilizumab in hypoxic COVID-19 patients, a prospective randomized trial	30-day mortality (from randomization)	M	P	H
EUCTR2020-001301-23-FR	Efficacy of Addition of Naproxen for COVID-19 Infection / Enacovid Study	Main Objective: To demonstrate the superiority of naproxen treatment addition to standard of care compared to standard of care in term of 30-day mortality;Secondary Objective: To demonstrate the effect of naproxen treatment to in-hospital mortality, morbidity, virus concentration;Primary end point(s): 30-day mortality all causes;Timepoint(s) of evaluation of this end point: 30 days	M	P	H
EUCTR2020-001335-28-NL	An open label phase II/III study of IFX-1 in patients with severe COVID-19 Pneumonia	Main Objective: The primary objective of Phase II is:<br>• To explore the effect of IFX-1 on COVID-19 related severe pneumonia (hypothesis generating)<br><br>The primary objective of Phase III is<br>• To demonstrate the efficacy of IFX-1 to improve of symptoms and outcome of severe COVID-19 pneumonia (confirmative)<br>;Secondary Objective: The secondary objectives of Phase II and Phase III are:<b…	C	Q	S
EUCTR2020-001188-96-FR	Chemoprophylaxis of SARS-CoV-2 infection (COVID-19) in exposed healthcare workers: a randomized double-blind placebo-controlled clinical trial	Secondary Objective: 1. To evaluate the occurrence of adverse events in each arm,<br>2. To evaluate the discontinuation rates of the investigational drug in each arm,<br>3. To evaluate the adherence of participants to study drug,<br>4. To evaluate the incidence of symptomatic cases of SARS-CoV-2 infection in each arm,<br>5. To evaluate the incidence of asymptomatic cases of SARS-CoV-2 infection i…	V	P	P
EUCTR2020-001373-70-FR	Study comparing the efficacy of a chloroquine analog (GNS561), anti PD-1 (nivolumab) and anti-interleukine-6 receptor (tocilizumab) versus standard of care in advanced or metastatic cancer patients with SARS-CoV-2 (COVID-19) infection	Main Objective: The main objective is to compare versus standard of care short-term mortality rates in advanced or metastatic cancer patients who are positive for COVID-19 treated with a chloroquine analog (GNS561), an anti-PD1 (nivolumab) or an anti-IL-6R antibody (tocilizumab).;Secondary Objective: The secondary objectives will be to describe in each arm of the study:<br>• Time to clinical impr…	M	P	H
EUCTR2020-001457-43-FR	Dexamethasone and oxygen support strategies in ICU patients with Covid-19 pneumonia	Main Objective: The main objective is to assess the impact of dexamethasone on overall mortality at day-60 after randomization in patients admitted in ICU for severe COVID-19 infection.<br>In non mechanical ventilation (MV) patients, the additional objective is to assess whether oxygen support based on either HFNO or CPAP modality in COVID-19 related AHRF reduces the need for mechanical ventilati…	M	P	H
EUCTR2020-001445-39-ES	CLINICAL TRIAL TO EVALUATE METHYLPREDNISOLONE PULSES AND TACROLIMUS IN HOSPITALIZED PATIENTS WITH SEVERE PNEUMONIA SECONDARY TO COVID-19 (TACROVID)	Main Objective: Main objective: <br>- To study the time (days) to reach clinical stability after randomization in hospitalized patients with severe pneumonia secondary to COVID-19, and elevated inflammatory parameters.;Secondary Objective: Clinical <br>-time to reach an afebrile state during 48 hours. <br>-time to reach PaO2/FiO2 >400 and/or SatO2/FiO2 >400 <br>-time until you reach a FR = 24 rpm…	C	T	S
EUCTR2020-001442-19-ES	Clinical trial of combined use of hydroxychloroquine, azithromycin, and tocilizumab for the treatment of COVID-19	Main Objective: To evaluate in-hospital mortality or mechanical ventilation in the Intensive Care Unit (ICU), or need for a rescue dose of tocilizumab in patients with confirmed infection by COVID-19 in treatment with hydroxychloroquine and azithromycin combined or non-tocilizumab.;Secondary Objective: To assess the clinical efficacy of tocilizumab in COVID-19 infection compared to the control ar…	M	P	H
EUCTR2020-001385-11-ES	EPICOS - Experimental clinical trial for PreventIon or COronavirus in health Care professionalS	Main Objective: To assess the efficacy of a daily single dose of TDF (300 mg)/FTC (200 mg), a daily single dose of HC (200 mg), daily single dose of TDF (300 mg)/FTC (200 mg) plus HC (200 mg) or placebo, during 12 weeks in: (1) reducing the incidence of symptomatic disease and (2) reducing the clinical severity of the coronavirus infection (COVID-19) among hospital healthcare workers aged 18 to 6…	V	P	P
EUCTR2020-001307-16-ES	Efficacy and Safety of corticoids in patients with adult respiratory distress syndrome (ARDS) secondary to coronavirus infection.	Main Objective: To evaluate the efficacy of methylprednisolone treatment, added to the standard treatment, in patients with ARDS secondary tp SARS-CoV-2 .;Secondary Objective: To evaluate the safety of methylprednisolone treatment, added to the standard treatment, in patients with ARDS secondary to SARS-CoV-2.;Primary end point(s): The primary end point of efficacy will be death for any cause in …	M	P	H
NCT04346446	Efficacy of Convalescent Plasma Therapy in Severely Sick COVID-19 Patients	Proportion of patients remaining free of mechanical ventilation in both groups|Mortality in both groups|Improvement in Pa02/Fi02 ratio in both groups|Improvement in SOFA score in both groups|Duration of hospital Stay in both group.|Duration of Intensive Care Unit stay in both groups.|Requirements of Vasopressor in both groups.|Days free of dialysis in both groups.	C	P	S
NCT04350320	Randomized Open-blind Controlled Trial to Study the Benefit of Colchicine in Patients With COVID-19	Changes in the patients' clinical status through the 7 points ordinal scale WHO|Changes in IL-6 concentrations|Improvement in the clinical status|Changes in the score for the Sequential Organ Failure Assessment|Changes in the punctuation in the National Early Warning Score|Number of days with invasive mechanical ventilation|Number of days with high flow oxygen therapy|Changes in other inflammator…	W	Q	S
NCT04350450	Hydroxychloroquine Treatment of Healthcare Workers With COVID19 Illness at Montefiore	Time to resolution of symptoms|Number of days from onset of illness to symptom resolution|Number of days to return to work|Rate of hospital admission in treated and untreated healthcare workers|Adverse effect of HCQ during treatment	C	T	S
NCT04350476	COVID-19 Remote Monitoring	Number of different arrhythmias|Temperature|Oxygen Saturation	C	Q	S
NCT04350580	Polyvalent Immunoglobulin in COVID-19 Related ARds	Ventilator-free days|Mortality|Sequential Organ Failure Assessment Score|P/F ratio|Lung compliance|Radiological score|Biological efficacy endpoints - C-reactive protein|Biological efficacy endpoints - Procalcitonin|Immunological profile|Number of patients using other treatments for COVID-19 related ARDS|Occurrence of deep vein thrombosis or pulmonary embolism|Total duration of mechanical ventilat…	C	T	S
NCT04350593	Dapagliflozin in Respiratory Failure in Patients With COVID-19	Time to first occurrence of either death from any cause or new/worsened organ dysfunction through 30 days of follow up, defined as at least one of the following:|Hierarchical composite outcome measures:|Time to hospital discharge|Total number of days alive, out of hospital, and/or free from mechanical ventilation|Total number of days alive, not in the ICU, and free from mechanical ventilation (as…	M	T	H
NCT04350671	Interferon Beta 1a in Hospitalized COVID-19 Patients	Time to clinical improvement|Mortality|SpO2 Improvement|Incidence of new mechanical ventilation use|Duration of hospitalization|Cumulative incidence of serious adverse events	C	T	S
NCT04350684	Umifenovir in Hospitalized COVID-19 Patients	Time to clinical improvement|Mortality|SpO2 Improvement|Incidence of new mechanical ventilation use|Duration of hospitalization|Cumulative incidence of serious adverse events	C	T	S
NCT04350736	First in Human SAD and MAD Study of Inhaled TD-0903, a Potential Treatment for ALI Associated With COVID-19	Safety and Tolerability of SAD of TD-0903: Adverse Events|Safety and Tolerability of MAD of TD-0903: Adverse Events|Pharmacokinetics (PK) of TD-0903 when given as a Single Ascending Dose (SAD): AUC|Pharmacokinetics (PK) of TD-0903 when given as a Single Ascending Dose (SAD): Cmax|Pharmacokinetics (PK) of TD-0903 when given as a Single Ascending Dose (SAD): Tmax|Pharmacokinetics (PK) of TD-0903 wh…	C	P	T
NCT04350931	Application of BCG Vaccine for Immune-prophylaxis Among Egyptian Healthcare Workers During the Pandemic of COVID-19	incidence of confirmed COVID-19|Effectiveness of BCG vaccine	V	P	P
NCT04351152	Phase 3 Study to Evaluate Efficacy and Safety of Lenzilumab in Hospitalized Patients With COVID-19 Pneumonia	Incidence of invasive mechanical ventilation (IMV) and/or Mortality|Incidence of acute respiratory distress syndrome (ARDS)|Duration of Hospitalization|Duration of Intensive Care Unit (ICU) Stay|Ventilator-free Days|Incidence of Non-invasive Ventilation|Proportion of Participants Alive and Off Oxygen|Percentage of Participants Experiencing Adverse Events|Percentage of Participants Experiencing Se…	C	P	S
NCT04351191	PRophylaxis of Exposed COVID-19 Individuals With Mild Symptoms Using choloroquinE Compounds	RT-PCR negative status|Progression of symptoms|Mortality	V	P	S
NCT04351243	A Study to Assess the Efficacy and Safety of of Gimsilumab in Subjects With Lung Injury or Acute Respiratory Distress Syndrome Secondary to COVID-19.	Primary endpoint|Secondary endpoint	C	P	T
NCT04351490	Impact of Zinc and Vitamin D3 Supplementation on the Survival of Aged Patients Infected With COVID-19	Survival rate in asymptomatic subjects at inclusion|Survival rate in symptomatic subjects at inclusion|Survival rate in overall subjects|Cumulative incidence of Covid-19 infection in asymptomatic subjects at inclusion	M	P	H
NCT04351516	Test and Treat COVID 65plus+	● Rate of hospitalization or death at day 7 after study inclusion	M	P	H
NCT04351581	Effects of Discontinuing Renin-angiotensin System Inhibitors in Patients With COVID-19	Days alive and out of hospital within 14 days after recruitment|Key-secondary composite endpoint: Occurrence of worsening of COVID-19|Occurrence and time to occurrence of each of the components of the key-secondary composite endpoint|Kidney function|Duration of index hospitalisation|30-day mortality|Number of days alive during the intervention period|Discharge beyond 30 days|Number of readmission…	M	Q	H
NCT04351620	High-dose Hydroxychloroquine for the Treatment of Ambulatory Patients With Mild COVID-19	Tolerability of high dose HCQ as measured by HCQ dose modification|Tolerability of high dose HCQ as measured by discontinuation of HCQ|Tolerability of High Dose HCQ as measured by Adverse Events|Rate of hospitalization due to COVID-19 as measured by number of patients hospitalized|Time to defervescence as measured in days while on treatment protocol|Resolution of other COVID-19 symptoms measured …	C	P	T
NCT04351724	Austrian CoronaVirus Adaptive Clinical Trial (COVID-19)	sustained improvement (>48h) of one point on the WHO Scale|Time to improvement on WHO Scale|Mean change in the ranking on an ordinal scale from baseline|time to discharge or a National Early Warning Score (NEWS) ≤2 (maintained for 24h), whichever occurs first|change from baseline in National Early Warning Score (NEWS)|Oxygenation free days|Incidence of new oxygen use during the trial|duration of …	W	Q	S
NCT04351763	Amiodarone or Verapamil in COVID-19 Hospitalized Patients With Symptoms	Clinical improvement|Mean change in the 7-point ordinal scale|Mortality|Time to resolution of fever|Clinical improvement or fever resolution|Tachyarrhythmias|Mortality or tachyarrhythmias|Time to clinical improvement from admission using the 7-point ordinal scale|Change in NEWS2 score|Duration of hospitalization|PO2/FIO2	C	P	S
NCT04351789	Impact of a Minimal Psychoeducational Intervention on Anxiety Among Hospitalized COVID-19 Patients in Denmark	Anxiety 1 month|Anxiety 3 months|Depression 3 months|Post Traumatic Stress Disorder (PTSD) symptoms 3 months|Anxiety 12 months|Post Traumatic Stress Disorder (PTSD) symptoms 12 months|Depression 12 months	C	P	O
NCT04351919	Assessment of Efficacy and Safety of HCQ and Antibiotics Administrated to Patients COVID19(+)	improvment or healing of clinical signs|Evolution of clinical signs	C	P	S
NCT04352348	Cohort of Patients Infected With SARS-CoV2 (COVID-19) or Suspected of Being	Identification of prognostic factors for progression to a severe form of COVID-19 infection|Clinical aggravation of the infection|Discharge of hospitalization|Death|Description of clinical manifestations|Description of biological manifestations|Description of radiological manifestations|Description of physiological manifestations|Patient-related prognostic factors|Virus-related risk factors|Compa…	C	P	D
NCT04352400	Efficacy of Nafamostat in Covid-19 Patients (RACONA Study)	Time-to-clinical improvement|Responders|Critical or dead patients|pO2/FiO2 ratio|SOFA score over time|Hospitalization|Mechanical ventilation|Mechanical ventilation duration|Cardiovascular disease	C	T	S
NCT04352465	Efficacy and Safety of MTX-loaded Nanoparticles to Treat Severe COVID-19 Patients	Change in clinical conditions|Change of Clinical symptoms - respiratory rate|Hypoxia|Changes of blood oxygen|Inflammatory parameters|Evolution of Acute Respiratory Syndrome|Hospital discharge|ICU discharge|Rate of mortality	C	P	S
NCT04352608	Safety and Immunogenicity Study of Inactivated Vaccine for Prophylaxis of SARS CoV-2 Infection (COVID-19)	Safety indexes of adverse reactions|Immunogenicity indexes of neutralizing-antibody seroconversion rates for the emergency vaccination schedule （day 0,14）|Immunogenicity indexes of neutralizing-antibody seroconversion rates for the routine vaccination schedule (day 0,28)|Occurrence of abnormal changes of laboratory safety examinations (hemoglobin,WBCs, platelets, ALT, AST, total bilirubin, creati…	C	Q	T
NCT04352751	Experimental Use of Convalescent Plasma for Passive Immunization in Current COVID-19 Pandemic in Pakistan in 2020	Change in COVID-19 severity status	C	P	S
NCT04352803	Adipose Mesenchymal Cells for Abatement of SARS-CoV-2 Respiratory Compromise in COVID-19 Disease	Safety - Incidence of unexpected adverse events|Efficacy - Frequency of progression to mechanical ventilation|Efficacy - Changes in length of mechanical ventilation|Efficacy - Changes in length of weaning of mechanical ventilation|Efficacy - Changes in length of hospital stay|Efficacy - Changes in mortality rate	C	P	T
NCT04352933	PROLIFIC ChemoprophylaxisTrial (COVID-19)	Time to positive COVID-19 disease|Number of COVID-19 test positive cases|Number of COVID-19 serological test positive cases|Severity of COVID-19 disease between each arm|Number of common COVID-19 complications between each arm	V	T	P
NCT04352946	HEalth Care Worker pROphylaxis Against COVID-19: The HERO Trial	Cumulative Incidence of COVID-19 Infection|Adverse events incidence|Duration of symptomatic COVID-19 disease|Days hospitalized attributed to COVID-19|Number or respiratory failure attributable to COVID-19 disease|Mortality Incidence|Days of work lost	V	P	P
NCT04352959	COVID-19: Nasal and Salivary Detection of the SARS-CoV-2 Virus After Antiviral Mouthrinses	Change from Baseline amount of SARS-CoV-2 in salivary samples at 7 days|Change from Baseline amount of SARS-CoV-2 virus in nasal samples at 7 days	V	Q	S
NCT04352985	Evaluating the Use of Polymyxin B Cartridge Hemoperfusion for Patients With Septic Shock and COVID 19		NA	NA	NA
NCT04353037	PATCH 2&3:Prevention & Treatment of COVID-19 (Severe Acute Respiratory Syndrome Coronavirus 2) With Hydroxychloroquine	Sub Study 1: Patients|Sub Study 2: Health Care Workers|Sub Study 1: Patients: Rate of secondary infection of co-inhabitants|Sub Study 1: Patients: Adverse Events|Sub Study 1: Patients: Negative for COVID-19|Sub Study 2:Health Care Workers:Number of shifts missed|Sub Study 2:Health Care Workers:Rate of adverse events|Sub Study 2:Health Care Workers:Rate of hospitalization	V	P	P
NCT04353128	Efficacy of Melatonin in the Prophylaxis of Coronavirus Disease 2019 (COVID-19) Among Healthcare Workers.	SARS-CoV 2 infection rate	V	P	P
NCT04353180	Assessment the Activity Value of 13- Cis-Retinoic Acid(Isotretinoin) in the Treatment of COVID-19	lung injury score|Absolute lymphocyte counts|Serum levels of CRP, ESR ,IL-1,IL-6,TNF and Type I interferon|Serum level of COVID19 RNA|All cause mortality rate|Ventilation free days|ICU free days|d-dimers|Time to first negative SARS-CoV-2 PCR in NP swap	R	Q	S
NCT04353206	Convalescent Plasma in ICU Patients With COVID-19-induced Respiratory Failure	Proportion of subjects who consent to the study and receive at least one dose of convalescent plasma.|Overall survival of patients in the ICU receiving at least once dose of convalescent plasma for Covid-19-induced respiratory failure.	M	P	H
NCT04353271	Trial of Hydroxychloroquine In Covid-19 Kinetics	Percentage of virus free subjects|Disease severity|Incidence of hospitalization|Incidence of Death|Incidence of confirmed SARS-CoV-2 Detection|Incidence of all-cause study medication discontinuation or withdrawal|Immunity to Covid-19	V	P	S
NCT04353284	Camostat Mesylate in COVID-19 Outpatients	Change in SARS-COV-2 viral load|Change in positive COVID-19 status|Change in COVID-19 symptom severity|Change in COVID-19 symptom frequency|Change in body temperature	V	Q	S
NCT04353336	Efficacay of Chloroquine in COVID-19 Treatment	Number of patients with virological cure	V	P	S
NCT04353518	Clinical Trial to Evaluate Mycobacterium w in Preventing COVID-19 in Subjects at Risk of Getting Infected With COVID-19	Number of subject acquiring COVID-19 infection|Incidence of Adverse Event and Serious Adverse Event (safety and tolerability)|Number of subject developing Upper Respiratory Tract Infection (URTI) symptoms|Number of subject developing severe COVID-19 infection based on ordinal scale	V	P	P
NCT04353596	Stopping ACE-inhibitors in COVID-19	Combination of maximum Sequential Organ Failure Assessment (SOFA) Score and death|Composite of admission to an intensive care unit (ICU), the use of mechanical ventilation, or all-cause death|Maximum and median maximum Sequential Organ Failure Assessment (SOFA) Score|Rates of non-invasive ventilation|Rates of renal replacement therapies|Change of viral burden|Change of C-reactive protein (CRP), i…	M	P	H
NCT04353674	Modulation of Hyperinflammation in COVID-19	Efficacy of a L-MOD against controls receiving supportive care in ICU.|Mortality|Hospital Discharge|Leukocyte Monitoring|Sequential Organ Failure Assessment (SOFA) Score|Intubation length|Markers of Inflammation|Leukocytes and Macrophages|Myocardial damage|Renal recovery	M	P	H
NCT04354259	Interferon Lambda for Immediate Antiviral Therapy at Diagnosis	Cohort A (Ambulatory) - Primary Efficacy Endpoint|Cohort A (Ambulatory) - Primary Safety Endpoint|Cohort B (Hospitalized) - Primary Efficacy Endpoint|Cohort B (Hospitalized) - Primary Safety Endpoint|Cohort A (Ambulatory) - Clinical Outcome #1|Cohort A (Ambulatory) - Clinical Outcome #2|Cohort A (Ambulatory) - Clinical Outcome #3|Cohort A (Ambulatory) - Clinical Outcome #4|Cohort A (Ambulatory) -…	C	P	S
NCT04354389	DAS181 for STOP COVID-19	COVID-19 Clinical Status Scale (CCSS)|Clinical Status Scale|Return To Room Air (RTRA)|Death (all cause)|SARS-CoV-2 RNA undetectable|Percent of subjects discharged	C	Q	S
NCT04354428	Treatment for SARS-CoV-2 in High-Risk Adult Outpatients	Lower respiratory tract infection (LRTI) rates|Incidence of hospitalization or mortality|Change in upper respiratory viral shedding|Rate of participant-reported adverse events	C	P	H
NCT04354441	Effect of Hydroxychloroquine in COVID-19 Positive Pregnant Women	COVID-19-related hospital admissions|Symptoms related to COVID-19 infection|Adverse Events|Maternal outcomes|Newborn outcomes	C	P	S
NCT04354597	Hydroxychloroquine and Azithromycin as Prophylaxis for Healthcare Workers Dealing With COVID19 Patients	Effect of HCQ and AZ in preventing infection with COVID-19 among healthcare workers working with COVID-19 patients|Safety of HCQ and AZ|Oxygen requirement|ICU admission|Mortality rate	V	P	P
NCT04354610	Cardiovascular and Renal Biomarkers to Predict Acute Heart or Kidney Injury in Severe Covid-19 Infection	Worsening of renal function by at least KDIGO grade 1 during hospitalization for Covid-19 infection|Troponin greater than 99th percentile during hospitalization for Covid-19 infection|AKI KDIGO grade 1 or higher in hospitalisation (approach with AND without a priori)|Elevation of troponin> 99th percentile in hospitalisation (approach with AND without a priori)|AKI KDIGO grade 1 or higher|Associat…	L	Q	S
NCT04354714	Ruxolitinib to Combat COVID-19	Overall survival|Length of hospital stay|Length of ICU stay|Duration of ventilator use|Duration of vasopressors use|Duration on renal replacement therapy|Viral kinetics as measured by virologic failure|Number of adverse events as measured by CTCAE v. 5.0|Proportion of participants with detectable virus	M	P	H
NCT04354805	Administration of Chloropromazine as a Treatment for COVID-19	Lactate dehydrogenase (LDH)	L	Q	S
NCT04354831	A Study Evaluating the Efficacy and Safety of High-Titer Anti-SARS-CoV-2 Plasma in Hospitalized Patients With COVID-19 Infection	Overall Mortality within 60 days|Length of ICU stay during current admission for COVID	M	P	H
NCT04354870	COVID-19 PrEP HCW HCQ Study	Frequency of seroconversion to SARS-CoV-2|Incidence of COVID-19 symptoms in the 4 weeks preceding seroconversion|Hospital admission rate|ICU admission rate|Mortality rate|Incidents of AEs or SAEs related to HCQ upon study termination time	S	P	D
NCT04355026	Use of Bromhexine and Hydroxychloroquine for Treatment of COVID-19 Pneumonia	Duration of hospitalization|Duration of disease|Hospital-aquired pneumonia|ICU stay duration|Oxygene therapy duration|Mechanical ventilatory support duration	C	T	S
NCT04355052	Open Label Study to Compare Efficacy, Safety and Tolerability of Hydroxychloroquine Combined With Azithromycin Compared to Hydroxychloroquine Combined With Camostat Mesylate and to no Treatment in SARS CoV 2 Virus	clinical state as reflected by NEWS scoring|positive PCR|prevention of ICU|prevention of assisted ventilation|prevention of ECMO|death	C	Q	S
NCT04355143	Colchicine to Reduce Myocardial Injury in COVID-19 (COLHEART-19)	Maximum troponin level|Delta (baseline to peak) troponin level|Delta (baseline to peak) brain natriuretic peptide (BNP) level|Change in left ventricular ejection fraction (LVEF) on echocardiography|Delta (baseline to peak) C-Reactive protein (CRP) inflammatory biomarker level|Delta (baseline to peak) D-Dimer inflammatory biomarker level|Hospital length of stay|Number of participants requiring mec…	L	Q	S
NCT04355234	Prevalence and Impact of COVID-19 Infection in Pregnant Women, Fetuses and Newborns	Seroprevalence or Number of women who are positive for SARS-CoV-2 in parturient woman|Consequences of SARS-CoV-2 infection in pregnant women and their newborns : Pregnancy outcome, maternal or neonatal complications|Assessment of the vertical transmission of SARS-CoV-2 and the possible routes of this transmission in women who are positive for SARS-CoV-2 during pregnancy|Assessment of susceptibili…	S	P	D
NCT04355247	Prophylactic Corticosteroid to Prevent COVID-19 Cytokine Storm	Clinical complete response criteria|Clinical Partial Response criteria|Secondary response criteria	C	P	S
NCT04355351	Study of Immune Response During SARS-CoV-2 Infection - (COVID-19)	Level of IFN-gamma after a non-specific stimulation of T lymphocytes	L	Q	S
NCT04355364	Efficacy and Safety of Aerosolized Intra-tracheal Dornase Alpha Administration in Patients With COVID19-induced ARDS (COVIDORNASE)	Efficacy of intratracheal administration: occurrence of at least one grade improvement	C	Q	S
NCT04355429	Efficacy of Captopril in Covid-19 Patients With Severe Acute Respiratory Syndrome (SARS) CoV-2 Pneumonia (CAPTOCOVID)	Efficacy of captopril nebulization addition to standard of care compared to standard of care.	C	P	S
NCT04355494	SOLIRIS® (Eculizumab) Treatment of Participants With COVID-19		NA	NA	NA
NCT04355533	Immunity Against SARS-CoV2 in Children and Their Parents / COVID-19	Seroconversion against SARS-CoV2 in children of the Parisian area|Protective immunity|Measure of Ab antiN and Ab anti-S1|Neutralization activity|Positive qPCR|correlation between different Ab and qPCR and neutralization activity|correlation of the NGBiotech rapid test with the classical serological result|correlation of the NGBiotech rapid test with qPCR results|duration of viral carriage in stoo…	S	P	D
NCT04355637	Inhaled Corticosteroid Treatment of COVID19 Patients With Pneumonia	Proportion of patients in both arms fulfilling the criteria for treatment failure|ICU admission|ICU refusal|Occurrence of complications|lactate dehydrogenase (LDH)|C Reactive Protein (CRP)|ferritin|D-dimer|leukocyte counts	C	P	S
NCT04355676	Evaluation of Activity and Safety of Two Regimens of Low Dose Oral Selinexor in Participants With Moderate or Severe COVID-19	Percentage of Participants with at Least a 2 Point Improvement in the Ordinal Scale|Time to Clinical Improvement (TTCI)|Overall Death Rate|Rate of Mechanical Ventilation|Time to Mechanical Ventilation|Overall Survival|Time to Improvement (2 points) in Clinical Measures Using the Ordinal Scale|Time to Intensive Care Unit (ICU) Admission|Rate of Intensive Care Unit (ICU) Admission|Length of Stay in…	W	P	S
NCT04355728	Use of UC-MSCs for COVID-19 Patients	Incidence of pre-specified infusion associated adverse events|Incidence of Severe Adverse Events|Survival rate after 90 days post first infusion|Ventilator-Free Days|Change in Oxygenation Index (OI)|Plat-PEEP|Sequential Organ Failure Assessment (SOFA) Scores|Small Identification Test (SIT) scores|Troponin I levels|C-Reactive Protein levels|Arachidonic Acid (AA)/Eicosapentaenoic Acid (EPA) Ratio|D…	C	P	T
NCT04355767	Convalescent Plasma vs. Placebo in Emergency Room Patients With COVID-19	Time to disease progression|Change in symptom severity over time	C	T	S
NCT04355793	Expanded Access Program of Ruxolitinib for the Emergency Treatment of Cytokine Storm From COVID-19 Infection		NA	NA	NA
NCT04355897	CoVID-19 Plasma in Treatment of COVID-19 Patients	Reduce mortality|Reduce requirement for mechanical ventilation.|Reduce the duration of mechanical ventilation.|Review of treatment related adverse events.	M	P	H
NCT04355936	Telmisartan for Treatment of COVID-19 Patients	Need for supplementary oxygen|PAFI02 measure|Number of opacified quadrants on lung Rx	C	P	S
NCT04355962	Sevoflurane in COVID-19 ARDS (SevCov)	Composite outcome of death rate (rate of patients that did not survive) and organ failure rate (rate of patients surviving with persistent organ dysfunction) at day 28|Length of stay ICU|Plasma Inflammatory markers|Length of stay at hospital|Sex-related differences in complications	C	P	H
NCT04356482	CONVALESCENT PLASMA FOR ILL PATIENTS BY COVID-19	Clinical improvement|improvement in tomographic image|test positivity for COVID-19|early and late complications associated to convalescent plasma|days at ICU	C	P	S
NCT04356495	Treatments to Decrease the Risk of Hospitalization or Death in Elderly Outpatients With Symptomatic SARS-CoV-2 Infection (COVID-19)	Proportion of participants with an occurrence of hospitalization|Death|Proportion of hospitalizations, overall and by cause, in each group|Death and causes of death|Proportion of intensive care hospitalizations, overall and by cause, in each group|Proportion of participants with negative nasopharyngeal SARS-CoV-2 RT-PCR|Proportion of participants with a loss of autonomy evaluated by the ADL and I…	C	P	S
NCT04356508	COVID-19: A Pilot Study of Adaptive Immunity and Anti-PD1	Viral clearance kinetics|Treatment-related adverse events of nivolumab (Intervention arm only)|Lymphocyte kinetics|Cytokine kinetics|Length of inpatient stay due to COVID-19	V	P	S
NCT04356534	Convalescent Plasma Trial in COVID -19 Patients	Requirement for invasive ventilation|Time to viral clearance|Radiological Improvement|Reduction in white cell count|C reactive protein measurement|lactate dehydrogenase measurement|Procalcitonin measurement|D Dimer measurement|Ferritin measurement|Troponin T measurement|Brain naturetic peptide measurement|Mortality rate	C	P	S
NCT04356677	Study to Evaluate the Safety and Efficacy of VIRAZOLE® in Hospitalized Adult Participants With Respiratory Distress Due to COVID-19	Change in the clinical status severity (CSS) rating from the first dose date up to the completion of treatment|Time to recover gas exchange to a PaO2/FiO2 ≥300 for at least 24 hours.|Time to reach peripheral capillary oxygen saturation (Sp02) >94% for at least 24 hours.	C	P	S
NCT04356690	Etoposide in Patients With COVID-19 Infection	Change in pulmonary status|Change in ferritin levels|Change in C-reactive protein levels|Change in d-dimer levels|Change in white blood cell count|Incidence of serious adverse events|Overall survival|Length of hospitalization|Duration of ventilation|Ventilator free days|Improvement in arterial oxygen partial pressure (PaO2) to fractional inspired oxygen (FiO2)	R	P	S
NCT04356937	Efficacy of Tocilizumab on Patients With COVID-19	Proportion of patients that require mechanical ventilation|Requirement for inotropes and/or vasopressors|8-level Clinical improvement Scale|Duration of mechanical ventalition|Hospital discharge|Mortality|Duration of ICU stay|Duration of time on supplemental oxygen|The proportion of patients who require renal replacement therapy or have doubling of creatinine	C	P	S
NCT04357028	Measles Vaccine in HCW	COVID-19 disease incidence|SARS-CoV-2 pneumonia|Critical care admission duration with SARS-CoV-2|Oxygen therapy with SARS-CoV-2	V	P	D
NCT04357106	COPLA Study: Treatment of Severe Forms of COronavirus Infection With Convalescent PLAsma	Lung injury|Overall survival|Adverse reactions to plasma	C	P	S
NCT04357327	Rapid Salivary Test to Detect SARS-CoV-2 (COVID-19)	Sensibility|Specificity	V	Q	D
NCT04357340	The Effects of Pulmonary Physiotherapy Treatments on Patients With COVID-19	Mixed venous O2 pressure (PVO2)|Mixed venous CO2 pressure (PVCO2)|PH|HCO3|Oxygen saturation (O2 Sat) from VBG|Six minute walk test|O2 Sat after one minute walking|O2 Sat after two minutes use of Partial Rebreather|O2 Sat after two minutes free air breathing|O2 sat/ Fio2|breathlessness|Mortality rate|Number of participants with Rehospitalization|The Health-Related Quality of Life (HRQOL)	C	Q	S
NCT04357366	suPAR-guided Anakinra Treatment for Validation of the Risk and Management of Respiratory Failure by COVID-19 (SAVE)	The ratio of patients who will not develop serious respiratory failure (SRF)|Comparison of the rate of patients who will not develop serious respiratory failure (SRF) until day 14 with historical comparators from Hellenic Sepsis Study Group Database|Change of scoring for respiratory symptoms in enrolled subjects between days 1 and 7|Change of scoring for respiratory symptoms in enrolled subjects …	C	P	H
NCT04357444	Low Dose of IL-2 In Acute Respiratory DistrEss Syndrome Related to COVID-19	The PaO2/FiO2 ratio at D7|Changes in Tregs between Baseline and Day 7 (expressed in %)|Number of days alive with oxygen therapy within 28 days|Maximal oxygen rate within 28 days|Number of days alive free of invasive or non-invasive ventilation within 28 days|Number of days alive outside ICU within 28 days|Number of days alive outside hospital within 28 days|Time (in days) from randomization to de…	L	Q	S
NCT04357457	Efficacy of Intravenous Almitrine in Reducing the Need for Mechanical Ventilation in Patients With Hypoxemic Acute Respiratory Failure Due to Covid-19-related Pneumonia	Rate of endotracheal intubation|28-day mortality|In-hospital mortality|Number of ventilator-free days|Number of days in the ICU|Number of days in the hospital|Discontinuation rate of the treatment	C	P	S
NCT04357613	IMATINIB IN COVID-19 DISEASE IN AGED PATIENTS.	To evaluate the benefit of early imatinib therapy to prevent severe COVID-19 disease in hospitalized aged patients.|To evaluate the feasibility of imatinib therapy.|To evaluate safety of imatinib therapy|To evaluate the clinical evolution|To evaluate the progression rate to severe COVID-19 disease|To evaluate mortality|To evaluate viral load|To evaluate plasmatic levels of imatinib	C	P	T
NCT04357730	STudy of Alteplase for Respiratory Failure in SARS-Cov2 (COVID-19)	PaO2/FiO2 improvement from pre-to-post intervention|Achievement of PaO2/FiO2 ≥ 200 or 50% increase in PaO2/FiO2|48 hour in-hospital mortality|14 days in-hospital mortality|28 days in-hospital mortality|ICU-free days|In-hospital coagulation-related event-free (arterial and venous) days|Ventilator-free days|Successful extubation|Successful weaning from paralysis|Survival to discharge	C	Q	S
NCT04357782	Administration of Intravenous Vitamin C in Novel Coronavirus Infection (COVID-19) and Decreased Oxygenation	Incidence of adverse events|Incidence of serious adverse reactions|Incidence of adverse reactions|Ventilator-free days|ICU-free days|Hospital-free days|All-cause mortality|Change in S/F ratio during HDIVC infusion|C-reactive protein (CRP)|Lactate dehydrogenase (LDH)|D-dimer|Lymphocyte count|Neutrophil to Lymphocyte ratio (NLR)|Serum Ferritin	C	P	T
NCT04357808	Efficacy of Subcutaneous Sarilumab in Hospitalised Patients With Moderate-severe COVID-19 Infection (SARCOVID)	Mean change in clinical status assessment using the 7-point ordinal scale at day 7 after randomisation|Duration of hospitalisation (days)|Death|Time to become afebrile (days)|Time to non-invasive mechanical ventilation (days)|Time to invasive mechanical ventilation (days)|Time to independence from supplementary oxygen therapy (days)|Mean change in clinical status assessment using the 7-point ordi…	W	Q	S
NCT04357860	Clinical Trial of Sarilumab in Adults With COVID-19	Ventilation requirements|Crude mortality|Time to clinical improvement|Time until improvement in oxygenation|Proportion of patients requiring invasive mechanical ventilation|Proportion of patients having negative COVID-19 CRP at each visit|Mean of serum cytokine levels|Adverse events related to medication and its administration|Incidence in the appearance of serious bacterial, fungal or opportunis…	C	O	S
NCT04357990	Kerecis Oral and Nasal Spray for Treating the Symptoms of COVID-19	Number of days until complete resolution of symptoms per group|Number of hospital admissions per group|Number of days until a reduction in symptoms per group|Number of adverse events per group	C	Q	S
NCT04358003	Plasma Adsorption in Patients With Confirmed COVID-19	All-cause mortality|Change in Sequential Organ Failure Assessment [SOFA] scores	M	P	H
NCT04358068	Evaluating the Efficacy of Hydroxychloroquine and Azithromycin to Prevent Hospitalization or Death in Persons With COVID-19	Proportion of participants who died from any cause or were hospitalized|Proportion of participants who died from any cause|Proportion of participants who died from any cause, or were hospitalized, or had an urgent visit to emergency room or clinic|Proportion of participants who died from any cause or were hospitalized through the end of follow-up|Proportion of participants who prematurely discont…	M	P	H
NCT04358081	Hydroxychloroquine Monotherapy and in Combination With Azithromycin in Patients With Moderate and Severe COVID-19 Disease	Percentage of participants who achieve clinical response|Percentage of Participants with Viral Clearance|Number of participants receiving hydroxychloroquine or hydroxychloroquine and azithromycin with adverse events of hydroxychloroquin or hydroxychloroquine and azithromycin compared to placebo	C	P	S
NCT04358211	Expanded Access to Convalescent Plasma to Treat and Prevent Pulmonary Complications Associated With COVID-19		NA	NA	NA
NCT04358406	Rhu-pGSN for Severe Covid-19 Pneumonia	Efficacy: Proportion of subjects alive not on vasopressors, mechanical ventilator, and dialysis|Safety and Tolerability: Proportion of subjects with serious adverse events (SAEs)|Efficacy: All cause mortality rate though Day 28|Efficacy: Change in World Health Organisation (WHO) 9-point severity score|Efficacy: Proportion of subjects discharged to home or immediate prior residence|Efficacy: Numbe…	C	P	H
NCT04358549	Study of the Use of Favipiravir in Hospitalized Subjects With COVID-19	Time to viral clearance|Status of clinical recovery as measured by the study-specific 6-point ordinal scale on Day 15|Clinical effect of favipiravir + SOC compared to SOC measured by the National Early Warning Score 2 (NEWS2)|Characterize the pharmacokinetics (PK) of favipiravir in plasma: Cmax)|Characterized the pharmacokinetics (PK) of favipiravir in plasma: Cmin|Characterized the pharmacokinet…	V	T	S
NCT04358588	Pulsed Inhaled Nitric Oxide for the Treatment of Patients With Mild or Moderate COVID-19		NA	NA	NA
NCT04358614	Baricitinib Therapy in COVID-19	To assess the safety of baricitinib combined with antiviral (lopinavir-ritonavir) in terms of serious or non-serious adverse events incidence rate.|To evaluate the impact of baricitinib in terms of clinical, laboratory, respiratory parameters.|ICU admission rate|Discharge rate.	C	P	T
NCT04358783	Convalescent Plasma Compared to the Best Available Therapy for the Treatment of SARS-CoV-2 Pneumonia	Early all-cause mortality|Time in days for SARS-CoV-2 RT-PCR negatives|The serum anti-SARS-CoV-2 antibody titres|Detection of serum antibodies	M	P	H
NCT04358809	Clinical Trial of Mycobacterium w in COVID-19 Positive Patients, Hospitalized But Not Critically Ill	Number of patients with increased disease severity|Incidence of adverse events and serious adverse events (Safety)|Number of COVID-19 patients discharged from hospital|Number of COVID-19 patients transfer to ICU|Number of COVID-19 patients with reduction in disease severity by 1 ordinal scale|Number of of symptom free patients	C	P	S
NCT04358835	Keto-diet for Intubated Critical Care COVID-19	Change in the partial pressure of carbon dioxide (PaCO2)|Change in minute ventilation|Change in respiratory system compliance|Change in driving pressure|Change in ventilator synchrony|Change in mean arterial pressure|Change in the fraction of inspired oxygen percentage of oxygen (FiO2)|Change in the partial pressure of carbon dioxide (PaO2) to the fraction of inspired oxygen percentage of oxygen …	L	Q	S
NCT04358926	Hyperbaric Oxygen Therapy Effect in COVID-19 RCT (HBOTCOVID19)	PaO2/FiO2|SpO2|NEWS Score|Inflammation level|Symptoms level|Average oxygen supply per day|Viral load|Chest Xray changes|Number of patients with IgG seroconverstion|Number of patients with IgM seroconverstion|FEV1/FVC|Time to symptoms recovery|Number of patients who required invasive ventilation|Time to negative virus PCR|Mortality rate|Number of barotrauma events (safety)	L	Q	S
NCT04358939	Prone Position in Patients on High-flow Nasal Oxygen Therapy for COVID-19 (HIGH-PRONE-COVID-19)	Therapeutic failure within 14 days of randomization|Evolution of oxygenation (PaO2/FiO2 ratio or SpO2/FiO2 surrogate) over the 14 days following randomization|Evolution of the SpO2/FiO2 ratio during the first prone session|Evolution of the ROX index during the first prone session|Evolution of the World Health Organization disease severity score of COVID|Patient comfort before, during and after th…	C	P	S
NCT04359095	Effectiveness and Safety of Medical Treatment for SARS-CoV-2 (COVID-19) in Colombia	Mortality|Number of Participants with Treatment Related Severe Adverse Events as Assessed by the NCORP Guidance for Collection of Adverse Events Related to COVID-19 Infection|Time to death|Number of Participants that are transferred to the Intensive Care Unit (ICU)|Number of Participants that need Mechanical Ventilation Support with endotracheal intubation.|Number of participants Cured assessed b…	M	P	H
NCT04359121	COVID-19 and the Developement of Phobic Fears of Disease	Development of phobias	C	P	O
NCT04359251	Different PEEP Settings of COVID-19 Induced ARDS	Respiratory system compliance improvement|Gas echanges improvement	C	P	S
NCT04359264	Direct Income SupporT and Advice Negating Spread of Epidemic COVID-19: a Randomized Controlled Trial	Symptoms consisent with COVID-19|Number of close contacts|Number of participants with positive test for COVID-19|Self-reported health based on the single question: In general, would you say your health is..|Ability to make ends meet based on the single question: At the end of the month, are you able to make ends meet?	C	P	S
NCT04359277	A Randomized Trial of Anticoagulation Strategies in COVID-19	All-cause mortality|Incidence of Cardiac Arrest|Incidence of symptomatic Deep Venous Thrombosis|Incidence of Pulmonary Embolism|Incidence of Arterial thromboembolism|Incidence of myocardial infarction|Incidence of hemodynamic shock|Incidence of Renal failure|Days of hypoxemia|Cardiac injury (e.g. troponin, NTproBNP)|Hypercoagulability (e.g. D-dimer, fibrinogen)|DIC score|Incidence of major bleedi…	M	P	H
NCT04359303	Indirect Endovenous Systemic Ozone for New Coronavirus Disease (COVID19) in Non-intubated Patients	COVID19 clinical scale|Number of died patients|Oro/nasopharynx virus|Thorax imaging (0=none; 1=unilateral; 2=bilateral; 3=ground-glass opacification; 4=consolidation)|Days in hospital|Venous gas blood analysis	W	Q	S
NCT04359316	Azithromycin in Hospitalized COVID-19 Patients	Time to clinical improvement|Mortality|SpO2 Improvement|Incidence of new mechanical ventilation use|Duration of hospitalization|Cumulative incidence of serious adverse events	C	T	S
NCT04359511	Efficacy and Safety of Corticosteroids in Oxygen-dependent Patients With COVID-19 Pneumonia	Clinical improvement defined by the improvement of 2 points on a 7-category ordinal scale, at 14 days.|Proportion of patients free of oxygen at day 14 and 28|Proportion of patients discharged alive from hospital at day 14 and 28|Time to discharge for patients alive|Proportion of patients that were hospitalized to ICU or who died at day 14 and 28|14 and 28 day mortality rate	W	Q	S
NCT04359537	Efficacy of Various Doses of Hydroxychloroquine in Pre-Exposure Prophylaxis for COVID 19	COVID-19-free survival in experimental arms compared to placebo|Incidence of confirmed SARS-COV-2 detection|Incidence of possible COVID-19 symptoms|Incidence of all-cause study medicine discontinuation|Ordinal Scale of COVID-19 Disease maximum severity if COVID-19 diagnosed at study end|Incidence of Hospitalization for COVID-19 or death|Incidence of study medication-related adverse events	V	P	S
NCT04359615	Favipiravir in Hospitalized COVID-19 Patients	Time to clinical improvement|Mortality|SpO2 Improvement|Incidence of new mechanical ventilation use|Duration of hospitalization|Cumulative incidence of serious adverse events	C	T	S
NCT04359654	Nebulised Dornase Alfa for Treatment of COVID-19	Reduction in inflammation|Mortality|Oxygen requirement|Length of hospital admission|Need of mechanical ventilation	C	P	S
NCT04359680	Trial to Evaluate the Efficacy and Safety of Nitazoxanide (NTZ) for Pre- or Post Exposure Prophylaxis of COVID-19 and Other Viral Respiratory Illnesses (VRI) in Healthcare Workers	The proportion of subjects with symptomatic laboratory-confirmed COVID-19 identified after start of treatment and before the end of the 6-week treatment period.|The proportion of subjects with symptomatic laboratory-confirmed VRI identified after the start of treatment and before the end of the 6-week treatment period.	C	P	D
NCT04359797	COVID-19 Patient Positioning Pragmatic Trial	Modified WHO Ordinal Scale|Mean FIO2	W	Q	S
NCT04359810	Plasma Therapy of COVID-19 in Critically Ill Patients	Time to Improvement|Rate of SARS-CoV-2 PCR Positivity|Duration of SARS-CoV-2 PCR Positivity|Duration of Need for Supplemental Oxygen|Duration of Hospitalization|In-hospital 28-day Mortality Rate	C	T	S
NCT04359862	Sedation With Sevoflurane Versus Propofol in Patients With Acute Respiratory Distress Syndrome Caused by COVID19 Infection	PaO2/FiO2|TNFα|IL-1b|IL-6|IL-8|Mortality	L	Q	S
NCT04359953	Efficacy of Hydroxychloroquine, Telmisartan and Azithromycin on the Survival of Hospitalized Elderly Patients With COVID-19	Two-weeks survival rate|Rate of undetectable RT-PCR of SARS-CoV-2|Rate of death|Hypotension|Hypothermia and hyperthermia|Pneumonia severity according to WHO|Pneumonia severity according to PSI (Hung et al 2017)|Rate of no cough|Rate of no dyspnea|Rate of no fever|Rate of no requiring supplemental oxygen|Rate of SARS-Cov-2 undetectable|Recovery time|Critical admission rate|Mechanical ventilation r…	M	P	H
NCT04360096	Inhaled Aviptadil for the Treatment of Non-Acute Lung Injury in COVID-19	Progression to ARDS|Blood oxygenation|RDP Dsypnea Scale|Distance walked in six minutes	C	P	S
NCT04360122	Levamisole and Isoprinosine in Immune-prophylaxis of Egyptian Healthcare Workers Facing COVID-19	Decrease the incidence of COVID-19 infection or its severity	V	P	P
NCT04360356	Ivermectin and Nitazoxanide Combination Therapy for COVID-19	Number of Patients with COVID-19-negative PCR|Number of patients with improved respiratory rate|Number of patients with improved PaO2|Number of patients with normalized Serum IL6|Number of patients with normalized Serum TNFα|Number of patients with normalized Serum iron|Number of patients with normalized Serum ferritin|Number of patients with normalized International normalized ratio INR for prot…	V	P	S
NCT04360486	Treatment Of CORONAVIRUS DISEASE 2019 (COVID-19) With Anti-Sars-CoV-2 Convalescent Plasma (ASCoV2CP)		NA	NA	NA
NCT04360551	Pilot Clinical Trial of the Safety and Efficacy of Telmisartan for the Mitigation of Pulmonary and Cardiac Complications in COVID-19 Patients	Maximum clinical severity of disease|Incidence of treatment emergent adverse events|Renin angiotensin system peptides|Plasma biomarkers	C	P	S
NCT04360759	Chloroquine Outpatient Treatment Evaluation for HIV-Covid-19	Event-free survival at 28 days post-randomization between experimental group and standard of care group|Incidence of serious adverse events|Incidence of adverse events of special interest related to investigational product at time of hospitalisation|Premature discontinuation of treatment|Time from treatment initiation to death, ARDS (PF/SF ratio < 300), or mechanical ventilation|Proportion with m…	C	P	S
NCT04360811	Assessment of Obstetric, Fetal and Neonatal Risks and Vertical SARS-CoV-2 Transmission During COVID-19 Pandemic	number of positive COVID-19 women	V	P	P
NCT04360824	Covid-19 Associated Coagulopathy	Mortality|Major Bleeding|Arterial Thrombosis|Venous Thromboembolism|ICU admission, intubation/ventilation|Packed Red Blood Cell Transfusions|Platelet Transfusions|Fresh Frozen Plasma Transfusions|Cryoprecipitate Transfusions|Prothrombin Complex Concentrate Transfusions	M	P	H
NCT04360837	PEEP Incremental and Decremental Alveolar Recruitment of Critically Ill Corona Virus Disease-19 (COVID-19) Patients	Changes in lung compliance|Change in global impedance|Change in recruitability|Gas exchange|Plateau pressure|End expiratory lung impedance (EELI)|Antero-to-posterior ventilation ratio|Center of ventilation|Global inhomogeneity index	C	O	S
NCT04360876	Targeted Steroids for ARDS Due to COVID-19 Pneumonia: A Pilot Randomized Clinical Trial	Ventilator Free Days (VFD) at Day 28|Clinical Status at day 14 as measured by World Health Organization (WHO) 7-point ordinal scale.|Clinical Status at day 28 as measured by WHO 7-point ordinal scale|In-Hospital Mortality at day 28|In-Hospital Mortality at day 90|Time to Mortality to day 28|ICU-free days to day 28|Hospital Length of Stay among survivors to day 90|Severity of ARDS to day 10|Days t…	C	T	S
NCT04360980	The Effects of Standard Protocol With or Without Colchicine in Covid-19 Infection	CRPxN/R ratio change|Clinical deterioration by the WHO definition|PCR Viral Load|CT severity involvement index|LDH change	C	Q	S
NCT04361032	Assessment of Efficacy and Safety of Tocilizumab Compared to DefeROxamine, Associated With Standards Treatments in COVID-19 (+) Patients Hospitalized In Intensive Care in Tunisia	the mortality rate	M	P	H
NCT04361214	Leflunomide in Mild COVID-19 Patients	Tolerability of high dose leflunomide as measured by leflunomide dose modifications|Tolerability of high dose leflunomide as measured by discontinuation of leflunomide|Tolerability of high dose leflunomide as measured by Adverse Events|Rate of hospitalization due to COVID-19 as measured by number of patients hospitalized|Time to defervescence as measured in days while on treatment protocol|Resolu…	C	P	T
NCT04361253	Evaluation of SARS-CoV-2 (COVID-19) Antibody-containing Plasma thErapy	Modified WHO Ordinal Scale (MOS) score	W	Q	S
NCT04361318	Hydroxychloroquine and Nitazoxanide Combination Therapy for COVID-19	Number of patients with COVID-19-negative PCR|Number of patients with improved respiratory rate|Number of patients with improved PaO2|Number of patients with normalized Serum IL6|Number of patients with normalized Serum TNFα|Number of patients with normalized Serum iron|Number of patients with normalized Serum ferritin|Number of patients with normalized International normalized ratio INR for prot…	V	P	S
NCT04361344	Neurodegeneration Markers and Neurological Course in Severe Covid-19 Infection	Change of neurodegeneration markers level	L	Q	S
NCT04361396	Assessment of the Presence of the SARS-COV-2 Virus in the Peritoneum of COVID-19 Patients	Assessment of the presence of the SARS-COV-2 virus at T4|Assessment of the presence of the SARS-COV-2 virus at T1|Assessment of the presence of the SARS-COV-2 virus in the peritoneal effusion at T2 or T4|Assessment of the presence of the SARS-COV-2 virus at T3|Assessment of the presence of the SARS-COV-2 virus at T5	V	P	S
NCT04361422	Isotretinoin in Treatment of COVID-19	Clinical clearance	C	P	S
NCT04361435	Lung Recruitment Device for COVID-19	SpO2/FIO2 Ratio|Blood pressures|Heart rates|Respiratory rate|Body temperature|Modified wood Score|Expiratory tidal lung volume.|End-tidal CO2|Clinical Respiratory severity scores.	L	Q	S
NCT04361448	Performance of 3 Sampling Methods for the Detection of SARS-CoV-2 (COVID-19) With Real-time Reverse Transcriptase PCR	sensitivity	V	Q	D
NCT04361461	Use of Hydroxychloroquine Alone or Associated for Inpatients With SARS-CoV2 Virus (COVID-19)	Individual response rate|All-cause mortality|Duration of mechanical ventilation|Proportion of patients which needed mechanical ventilation during study|World Health Organization (WHO) Ordinal scale|Duration of hospitalization|Rates of drug discontinuation	C	P	S
NCT04361474	Trial Evaluating the Efficacy of Local Budesonide Therapy in the Management of Hyposmia in COVID-19 Patients Without Signs of Severity	improvement of more than 2 points on the ODORATEST	C	Q	S
NCT04361526	Pilot Study on Cytokine Filtration in COVID-19 ARDS	Mechanical ventilation-free days|30-day mortality|length of ICU stay (days)|length of hospital stay|Duration of renal replacement and cathecolamines therapies|Need for extracorporeal membrane oxygenation (ECMO) support|multi-organ failure measured by the Sequential Organ Failure Assessment (SOFA) score	C	T	S
NCT04361552	Tocilizumab for the Treatment of Cytokine Release Syndrome in Patients With COVID-19 (SARS-CoV-2 Infection)	7-day length of invasive mechanical ventilation (MV)|30-day mortality rate|Rate of intensive care (ICU) transfer|Rate of invasive mechanical ventilation|Rate of tracheostomy|Length of ICU stay|Length of hospital stay	C	T	S
NCT04361643	LENALIDOMIDE COVID-19 TRIAL	Clinical improvement|Immune-inflammatory improvement|Mortality	C	P	S
NCT04361838	The COVID-19 ICU PRAYER Study	Impact of multi-denominational prayer on clinical outcomes of critically ill COVID-19 patients in the Intensive Care Unit on mortality.|Difference in patient outcomes - Acute Physiology and Chronic Health Enquiry. APACHE II score.|Difference in patient outcomes - Sequential Organ Failure Assessment - SOFA Score|Difference in patient outcomes - Length of stay in ICU.|Difference in patient outcomes…	O	P	O
NCT04361916	Home Care for Patients With COVID-19: Active Monitoring in Two Italian Health Units (Casale Monferrato and Torino)	SpO2|in-hospital mortality|need of intubation|feasibility of active monitoring	L	Q	S
NCT04361942	Treatment of Severe COVID-19 Pneumonia With Allogeneic Mesenchymal Stromal Cells (COVID_MSV)	Proportion of patients who have achieved withdrawal of invasive mechanical ventilation|Rate of mortality|Proportion of patients who have achieved clinical response|Proportion of patients who have achieved radiological responses	C	P	S
NCT04362085	Coagulopathy of COVID-19: A Pragmatic Randomized Controlled Trial of Therapeutic Anticoagulation Versus Standard Care	Composite outcome of ICU admission (yes/no), non-invasive positive pressure ventilation (yes/no), invasive mechanical ventilation (yes/no), or all-cause death (yes/no) up to 28 days.|All-cause death|Composite outcome of ICU admission or all-cause death|Major bleeding|Number of participants who received red blood cell transfusion|Number of participants with transfusion of platelets, frozen plasma,…	C	P	H
NCT04362111	Early Identification and Treatment of Cytokine Storm Syndrome in Covid-19	No increase in oxygen requirement and no increase in respiratory support measures|Improvement in Cytokine Storm markers|No requirement for mechanical ventilation	C	P	S
NCT04362124	Performance Evaluation of BCG vs COVID-19	Primary outcome|Secondary outcome	NA	NA	NA
NCT04362137	Phase 3 Randomized, Double-blind, Placebo-controlled Multi-center Study to Assess the Efficacy and Safety of Ruxolitinib in Patients With COVID-19 Associated Cytokine Storm (RUXCOVID)	Proportion of patients who die, develop respiratory failure [require mechanical ventilation] or require intensive care unit (ICU) care|Clinical status|Percentage of patients with at least two-point improvement from baseline in clinical status|Percentage of patients with at least one-point improvement from baseline in clinical status|Percentage of patients with at least one-point deterioration fro…	C	P	H
NCT04362176	Passive Immunity Trial of Nashville II	COVID Ordinal Outcomes Scale:Day 15|All-location, all-cause 14-day mortality|All-location, all-cause 28-day mortality|COVID Ordinal Outcomes Scale Day 3|COVID Ordinal Outcomes Scale Day 8|COVID Ordinal Outcomes Scale Day 29|Composite of death or receipt of ECMO through Day 28|Oxygen-free days through Day 28|Vasopressor-free days through Day 28|Ventilator-free days through Day 28|ICU-free days thr…	W	Q	S
NCT04362189	Efficacy and Safety Study of Allogeneic HB-adMSCs for the Treatment of COVID-19	28-day mortality|Invasive mechanical ventilation|Leukocyte differential|C Reactive protein|TNF alpha|IL-6|Glucose|Calcium|Albumin|Total protein|Sodium|Total carbon dioxide|Potassium|Chloride|BUN|Creatinine|Alkaline phosphatase|Alanine aminotransferase|Total bilirubin|White blood cells|Red blood cells|Hemoglobin|Hematocrit|Mean corpuscular volume|Mean corpuscular hemoglobin|Mean corpuscular hemogl…	M	P	H
NCT04362332	Chloroquine, Hydroxychloroquine or Only Supportive Care in Patients AdmItted With Moderate to Severe COVID-19	Composite endpoint with disease progression defined as a NEWS2score ≥ 7 within 14 days or resulting in admission to Intensive/Medium Care unit or resulting in death within 14 days.|Side effects	C	P	H
NCT04362813	Study of Efficacy and Safety of Canakinumab Treatment for CRS in Participants With COVID-19-induced Pneumonia	Number of patients with clinical response|COVID-19-related death rate during the 4-week period after study treatment|Ratio to baseline in the C-reactive protein (CRP)|Ratio to baseline in the serum ferritin|Ratio to baseline in the D-dimer|Number of participants with Adverse Event (AE), serious adverse events (SAE), clinically significant changes in laboratory measures, and vital signs	C	P	S
NCT04363034	Arkansas Expanded Access COVID-19 Convalescent Plasma Treatment Program		NA	NA	NA
NCT04363060	Azithromycin+Amoxicillin/Clavulanate vs Amoxicillin/Clavulanate in COVID19 Patients With Pneumonia in Non-intensive Unit	Rate of positive SARS-CoV-2 RT-PCR|Clinical evolution on the WHO Ordinal Scale for Clinical Improvement for COVID-19|Total duration of antibiotic treatment during the 30 days following inclusion|Number of all-cause mortality during the 30 days following inclusion|Number of in-hospital mortality during the 30 days following inclusion|Number of patients transferred to intensive care unit during the…	V	P	S
NCT04363203	VA Remote and Equitable Access to COVID-19 Healthcare Delivery (VA-REACH TRIAL)	Days to resolution of cough, fever and shortness of breath|Days to resolution of all COVID-19 symptoms|All cause hospitalization|All cause mortality|COVID-19 specific mortality|COVID-19 specific hospitalization	C	T	S
NCT04363216	Pharmacologic Ascorbic Acid as an Activator of Lymphocyte Signaling for COVID-19 Treatment	Clinical Improvement|Patient status upgraded to ICU level [Clinical decline]|Oxygen supplementation|Days with fever|Days to discharge|SAEs	C	P	S
NCT04363346	Study of FT516 for the Treatment of COVID-19 in Hospitalized Patients With Hypoxia	Number of participants with Dose Limiting Toxicity Events|The time in days from the 1st FT516 infusion to the elimination of viral shedding in nasal pharyngeal and stool samples|The time in days from the 1st FT516 infusion to discontinued need for supplemental oxygen|The time in days from the 1st FT516 infusion to hospital discharge	C	P	T
NCT04363372	A Study for Efficacy and Safety of Live Biotherapeutic MRx4DP0004 to Treat COVID-19	Change in mean clinical status score in each treatment arm|Number of adverse events in each treatment arm|Number of patients with an improvement in clinical status score in each treatment arm|Number of patients with a deterioration in clinical status score in each treatment arm|Number of patients with at least 95% oxygen saturation on room air in each treatment arm|Time to patients with at least …	C	Q	S
NCT04363385	Collection of Biological Samples With Clinical Characterization of Covid-19 Patients	Phenotype/genotype correlation research modulating the severity of Covid-19 disease|Phenotype/transcriptomic correlation research modulating the severity of Covid-19 disease|Phenotype/biomarker correlation research modulating the severity of Covid-19 disease|Development of clinical-biological scores in the severity of Covid-19 disease|Development of predictive imaging scores in the severity of Co…	C	O	O
NCT04363437	the COMBAT-COVID-19 Pilot Study	Percentage of Patients requiring supplemental oxygen	C	P	S
NCT04363450	Hydroxychloroquine as Prophylaxis for COVID-19 in Healthcare Workers (HCQPreP)	Incidence of symptomatic COVID-19 infection in healthcare workers|Absenteeism from work due to COVID-19|Severity of COVID-19 infection	C	P	P
NCT04363463	Impact of Prone Position in Patients Under Spontaneous Breathing on Intubation or Non-invasive Ventilation or Death Incidence During COVID-19 Acute Respiratory Distress	Percent age of patients who will have endotracheal intubation or non-invasive ventilation at two pressure levels and/or die, in each of the 2 randomization groups.|Duration in days for the change of 2 points on the WHO ordinal scale|Rate (%) of intubation and invasive ventilation in the 2 randomization groups.|Rate (%) of non-invasive ventilation at two pressure levels in the 2 randomization grou…	C	P	S
NCT04363528	Incidence of Deep Vein Thrombosis at Doppler Echo in Covid-19 Patients With SARS-Cov-2 Pneumopathy Hospitalized in ICU	Incidence of Deep Vein Thrombosis at Doppler Echo in Patients With SARS-Cov-2 Pneumopathy Hospitalized in ICU	C	P	P
NCT04363541	Local Thermotherapy for Patients With Moderate Symptoms of COVID-19	Hospitalization time|Patients needing intensive care|Symptoms after hospitalization release	C	T	S
NCT04363593	Serology COVID-19 From the Cornwall Hospital Union	Serological test evaluation|Population seroprevalence	S	P	D
NCT04363736	A Study to Investigate Intravenous Tocilizumab in Participants With Moderate to Severe COVID-19 Pneumonia	Concentration of C-Reactive Protein (CRP)|Serum Concentration of Interleukin-6 (IL-6)|Serum Concentration of Soluble Interleukin Receptor (sIL-6R)|Serum Concentration of Ferritin|Serum Concentration of TCZ Following Administration of 8 mg/kg IV TCZ|Serum Concentration of TCZ Following Administration of 4 mg/kg IV TCZ|Clinical Status, as Assessed Using a 7-Category Ordinal Scale|Time to Clinical I…	L	Q	S
NCT04363749	COVID-19 Infection: Exploration of Respiratory Control Center Abnormalities	Intensity of the emotional response to hypoxic exposure (14.3 et 12.7% FIO2)|Perception of a hypoxic stimulus induced dyspnea (14.3 et 12.7% FIO2)|Perception of a hypercapnic stimulus induced dyspnea (7% CO2)|Perception of a inspiratory mechanical constraint induced dyspnea|brain MRI	O	Q	O
NCT04363814	Clinical Impact of BACTEK-R in Subject With Mild Pneumonia Due to COVID-19 Infection	Clinical recovery|Clinical worsening|Clinical severity|Time to symptoms remission|Medication Use|Hospitalization time|Blood routine test|Heart rate|Blood pressure|Cardiac auscultation|Oxygen saturation|Adverse events	C	P	S
NCT04363827	Protect: A Randomized Study With Hydroxychloroquine Versus Observational Support for Prevention and Early Phase Treatment of Coronavirus Disease (COVID-19)	the proportion of subjects of Group 1 who become symptomatic and/or swab positive in each arm within 1 month from randomization.|the proportion of subjects of Group 2 who become swab negative in each arm within 14 days from randomization.|The proportion of subjects with positive swabs in Group 1 within 1 month from randomization in both arms|The proportion of subjects of Group 1 who become sympto…	C	P	P
NCT04363853	Tocilizumab Treatment in Patients With COVID-19	Hematic biometry|Blood chemistry|Blood gas|blood gas|thorax radiography	L	Q	S
NCT04363866	A Pilot Study to Assess Hydroxychloroquine in Patients With SARS-CoV-2 (COVID-19)	Clinical Status at Day 5 Assessed by a 6-Point Ordinal Scale|Number of Participants with Detectable SARS-CoV-2 Virus from Day 0 to Day 28 and at Day 5|Toxicity of Study Drug Assessed by Incidence of Adverse Events	C	O	S
NCT04364009	Anakinra for COVID-19 Respiratory Symptoms	Treatment success|OMS progression scale (on a 7 point ordinal scale)|Overall survival|Time to ICU admission|Time to ventilatory support|Change in National Early Warning Score (NEW)from baseline to Day 3, Day 10, Day 14 and Day 28|Change in inflammatory parameter|Hospital length of stay|ICU parameter|Number of participants with treatment-related adverse events as assessed by CTCAE v4.0|Predictors …	C	P	S
NCT04364022	Efficacy of Pragmatic Same-day COVID-19 Ring Prophylaxis for Adult Individuals Exposed to SARS-CoV-2 in Switzerland	21-day incidence of COVID-19 in individuals exposed to SARS-CoV- 2 who are asymptomatic at baseline (intent-to-treat (ITT) analysis).|21-day incidence of COVID-19 in individuals exposed to SARS-CoV- 2 who are asymptomatic, PCR-confirmed SARS-CoV-2 negative and have negative SARS-CoV-2 serology at baseline (modified ITT)|21-day incidence of SARS-CoV-2 infection in individuals exposed to SARS-CoV-2…	V	P	P
NCT04344210	Impact of Tele-interventions During the COVID-19 Pandemic in Patients With Diabetes Mellitus	Variation in HbA1c levels	L	Q	S
NCT04344561	Incline Positioning in COVID-19 Patients for Improvement in Oxygen Saturation	Incidence of Mechanical Ventilation;Percentage of time in the assigned position	C	P	S
NCT04344548	Phase I / II Clinical Study of Immunotherapy Based on Adoptive Cell Transfer as a Therapeutic Alternative for Patients With COVID-19 in Colombia	Adverse effects and Safety	C	P	T
NCT04345887	Spironolactone in Covid-19 Induced ARDS	p/f ratio	L	Q	S
NCT04345419	A Real-life Experience on Treatment of Patients With COVID 19	Number of patients with decreased viral load	V	P	S
NCT04345406	Angiotensin Converting Enzyme Inhibitors in Treatment of Covid 19	number of patients with virological cure	V	P	S
NCT04345549	Ayurveda Self-Management for Flu Like Symptoms During the Covid-19 Outbreak	Time to achieve afebrile	C	T	S
NCT04345614	A Study of CM4620-Injectable Emulsion (IE) in Patients With Severe COVID-19 Pneumonia	Improvement on a 7-point Ordinal Scale;Incidence of treatment-emergent adverse events (TEAE) (safety and tolerability)	W	Q	S
NCT04346420	Impact of the Double-Trunk Mask on Oxygenation Titration in COVID-19	Change in O2 output	L	Q	S
NCT04346628	Oral Favipiravir Compared to Standard Supportive Care in Subjects With Mild COVID-19	Time until cessation of oral shedding of SARS-CoV-2 virus	V	T	S
NCT04346927	Telerehabilitation for Patients Diagnosed With Coronavirus	Visual Analogue Scale;Modified Borg Scale;Leicester Cough Questionnaire;Timed Up and Go;30 Second Chair Stand Test;The Beck Depression Inventory;The Beck Anxiety Inventory	C	O	S
NCT04346082	Feasibility of Online Based Mindfulness Interventions During COVID-19 Outbreak	rate of recruitment;rate of attendence	O	P	O
NCT04351906	Low-flow Extracorporeal Carbon Dioxide Removal in COVID-19-associated Acute Respiratory Distress Syndrome	Delta decrease in arterial partial pressure of carbon dioxide during ECCO2R treatment	L	Q	S
NCT04348461	BAttLe Against COVID-19 Using MesenchYmal Stromal Cells	Efficacy of the administration of allogeneic mesenchymal stem cells derived from adipose tissue assessed by Survival Rate);Safety of the administration of allogeneic mesenchymal stem cells derived from adipose tissue assessed by Adverse Event Rate	C	P	T
ACTRN12620000480987	Stress-reduction Using Probiotics to Promote Ongoing Resilience Throughout COVID-19 for Healthcare Workers (SUPPORT COVID-19 Healthcare Workers)	Scores on the Perceived Stress Scale. The PSS is a widely used measure of the appraisal of how stressful events over the previous month are. Scores range from 0 to 40 with higher scores representing higher levels of stress. [Perceived Stress Scale scores will be measured at baseline and following a 12 week intervention period, with the primary time point of interest being scores post the 12 week …	O	Q	O
ACTRN12620000482965	Impact of high intensity interval training and aerobic training on stress, depression symptoms, anxiety and resilience in self-isolated people during the COVID-19 health emergency in Spain	Anxiety assessed by the State-Trait Anxiety Inventory (STAI)[Baseline (after the first exercise session), after three weeks of exercise intervention and after the self-isolation period (approximately 6 weeks after intervention commencement).];Depression symptoms by the the Beck Depression Inventory (BDI-13)[Baseline (after the first exercise session), after three weeks of exercise intervention an…	O	Q	O
NCT04349371	Saved From COVID-19	Number of symptomatic illness in at risk healthcare workers;Number of healthcare workers with symptomatic COVID infections;Number of severe illness in at risk healthcare workers	C	P	P
NCT04350281	Double Therapy With IFN-beta 1b and Hydroxychloroquine	Time to negative NPS viral load	V	T	S
NCT04351295	Efficacy of Faviprevir in COVID-19 Treatment	Number of patients with viral cure	V	P	S
ACTRN12620000473965	Reducing acute severe respiratory events in health care workers during the Covid-19 pandemic with OM85	Proportion of health care workers (HCW) contracting an lower respiratory illness necessitating workforce removal, assessed from workforce information including rosters and medical records.[Assessed at the end of month 3, prior to the wait-list control (WLC) commencing treatment.]	C	P	P
ACTRN12620000492954	A Facebook delivered physical activity focused group lifestyle intervention for older adults during the COVID-19 pandemic	Feasibility. Measured by:<br>1. Participant retention (in program and completion of questionnaires).<br>2. Usage of the Facebook group (manual calculation of the sum of comments & likes)<br>3. Feasibility and acceptability questionnaire (modified version of Naslund et al's (2016) Feasibility and Acceptability questionnaire) [Post intervention (week 6)];SIDAS- Suicidal Ideation Attributes Scale[Po…	O	P	O
ACTRN12620000478910	Cord Blood Therapy to prevent progression of COVID-19 related pneumonia	Safety and tolerability of UCB cell administration (absence of immediate and short-term side effects, including allergic reactions, line related effects, infection)<br>This will be assessed based on partipant rports, and hospital charts and monitoring[24 hrs (collection of hourly vital monitoring data, examination at 24 hrs)];Clinical improvement, as documented by change of patient status on a se…	C	P	T
ISRCTN14326006	Does taking hydroxychloroquine before and during exposure to patients protect frontline healthcare workers from coronavirus?	Microbiologically confirmed COVID-19 (i.e. SARS-CoV-2 infection). This is a composite endpoint which includes any validated SARS-CoV-2 diagnostic assay, including detection of viral RNA and seroconversion, performed on participant viral detection samples throughout the study period or venous samples for serologic testing collected at day 0, 30, 60, 90 and 120.	V	P	P
NCT04351347	The Efficacy of Ivermectin and Nitazoxanide in COVID-19 Treatment	Number of patients with virological cure	V	P	S
NCT04351542	Ayurveda for Flu Like Illness During Covid-19 Outbreak	Time to achieve afebrile;Severity of symptom score	C	T	S
ChiCTR2000032098	Danggui Shaoyao Powder in the synergistic treatment of novel coronavirus pneumonia (COVID-19)	Blood routine;Blood biochemistry;C-reactive protein;chest CT;2019-ncov-RNA;TCM symptom;	L	Q	S
ACTRN12620000477921	The design of an updated iron lung ventilator which can be easily built and used by people with minimal training in situations such as COVID-19 where skilled doctors or normal ventilators are unavailable.	Recorded tidal volumes whilst continuously using the pandemic cuirass ventilator for 60 minutes. Tidal volumes will be recorded using a face mask connected to an existing GE Anaesthetic Machine.[Tidal volumes will be assessed every 15 minutes. Total sedation time will be 60 minutes.]	C	Q	S
ACTRN12620000472976	Adapting the Decathlon Group Easybreathe® snorkelling face mask for the safer administration of oxygen and/or continuous positive airway pressure and in the intra/interhospital transportation of patients with proven or suspected COVID 19 infection.	Patient comfort and tolerability as assessed by a 6 point question item originally developed for CPAP use. We will use a modified version of the 6 point scale developed by Balachandran et al JCSM 2013. It is a 6 point Likert scale.[At 24 hours after initiation of therapy and every subsequent 24 hours of use of the mask until disposition from hospital.]	C	Q	S
ChiCTR2000031955	Study for prevention of novel coronavirus pneumonia (COVID-19) in high risk population by Chinese medicine	SARS-CoV-2;IgM;IgG;	S	P	P
ChiCTR2000031944	Efficacy of Chinese Herbal Tea in the Prevention of Novel Coronavirus Pneumonia (COVID-19): a Randomized Controlled Trial	the rate of 2019-nCoV RNA positive;	V	P	P
ChiCTR2000032013	The prevention and treatment strategy of the protective respirator related facial pressure injuries among healthcare professionals fighting novel coronavirus pneumonia (COVID-19)	temperature;area of facial indents;gray level of facial indents;pain;	C	O	O
ChiCTR2000032011	Effecacy and Safety of Hyperbaric Oxygen Therapy to patients with novel coronavirus pneumonia (COVID-19)	Oxygenation index;	L	Q	S
EUCTR2020-001324-33-FR	Use of a respiratory multiplex PCR and procalcitonin to reduce antibiotic exposure in patients with severe confirmed COVID-19 pneumonia	Timepoint(s) of evaluation of this end point: D28;Primary end point(s): The primary assessment criterion is the number of antibiotic free days at D28, which corresponds to the number of days alive without any antibiotic at Day 28. The D28 time point is usual in studies assessing antibiotic use in ICU patients.;Secondary Objective: Mortality rates at 28 (D28) and 90 days (D90); <br>- Overall antib…	C	Q	S
ChiCTR2000031888	A medical records based study for ''Guangdong Pneumonia NO.1'' in the Treatment of Novel Coronavirus Pneumonia (COVID-19)	syndrome;nucleic acid of nCoV-19;blood count;liver and kidney function;cardiac enzymes;lung CT;	V	P	S
EUCTR2020-001257-51-DK	Hydroxychloroquine for prevention of COVID-19 in patients on chronic dialysis	Timepoint(s) of evaluation of this end point: End of study as defined by 3 months following last inclusion;Primary end point(s): The primary efficacy outcome of hospitalization due to SAR-COV-2 infections will be compared between patients allocated hydroxychloroquine and no treatment.;Secondary Objective: Not applicable;Main Objective: The main objective of the following multicentre parallel-grou…	C	P	S
EUCTR2020-001320-34-NL	A clinicial trial to investigate te effect of valsartan compared to placebo on acute respiratory failure in hospitalized SARS-CoV-2-infected patients	Main Objective: To investigate the effect of the ARB valsartan in comparison to placebo on the occurrence of one of the following items, within 14 days of randomization:1) ICU admission; 2) Mechanical ventilation; 3) Mortality.;Secondary Objective: • Death within 14 days, 30 days, 90 days and at 1 year, defined as all-cause mortality.<br>• Mechanical ventilation and ICU admission within 14 days.<…	C	P	H
EUCTR2020-001420-34-DK	Senicapoc treatment of COVID-19 positive patients in intensive care	Timepoint(s) of evaluation of this end point: The primary measure of the PaO2/FIO2 ratio will be done 72-hours after<br>randomization. This time point was chosen to allow adequate time for<br>the interventions to work while avoiding missing data due to deaths.;Primary end point(s): The primary outcome will be the PaO2/FiO2 ratio 72 hours after<br>randomization. The PaO2/FiO2 ratio will be calcula…	L	Q	S
NL8521	Continuous positive airway pressure in severe Covid-19 pneumonia	A change in the two-dimensional variable (SpO2, RR), the combination of oxygen saturation and respiratory rate.<br>SpO2 is measured with a pulse oximeter and RR is derived from the pressure changes in the mouth compartment of the mask. <br>	L	Q	S
EUCTR2020-001290-74-ES	Efficacy and safety of sarilumab in the early treament of hospitalized patients with mild-moderate neumonia and COVID19 infection versus standard of care	Timepoint(s) of evaluation of this end point: 28 days;Primary end point(s): Time to clinical improvement, defined as the time from randomization to a two-point improvement (from randomization status) on an ordinal scale of seven categories or hospital discharge, whichever occurs first.<br><br>The seven-category ordinal scale consisted of the following categories: 1, not hospitalized with resumpti…	C	T	S
EUCTR2020-001262-11-ES	Clinical trial to assess the efficacy and safety of cyclosporin A treatment associated with standard treatment versus standard treatment only in hospitalized patients with confirmed coronavirus infection	Main Objective: To assess the efficacy of the association of CsA with standard treatment in reducing the severity of COVID19-confirmed infection in hospitalized patients.;Secondary Objective: -To assess the efficacy of CsA in combination with standard treatment in reducing mortality, days in hospital, days in ICU beds, and FiO2.<br>- Compare the evolution of BP, plasma creatinine, lymphocyte coun…	V	P	S
EUCTR2020-001406-27-FR	efficacy and safety of a bitherapy by hydroxychloroquine + azythromycin vs monotherapy by hydroxychoroquine in adult patients with documentated infection by covid19	Timepoint(s) of evaluation of this end point: D11;Primary end point(s): At least 1 level improvement in clinical status assessed by a level ordinal scale (at least 1 level) between D1 and D11 :<br>1. Not hospitalized, no limitation of activities<br>2. Not hospitalized, limitation of activities;<br>3. Hospitalized, not requiring oxygen supplementation<br>4. Hospitalized, requiring oxygen supplemen…	W	Q	S
EUCTR2020-001553-48-FR	Corticoïdes au cours de la pneumonie virale Covid-19 liée à l’infection par le SARS-Cov-2	Main Objective: Réduire le nombre de patients présentant une indication théorique de transfert en réanimation d’indication respiratoire, évaluée par une SpO2 < 90% stabilisée au repos et sous un débit d’oxygène ne dépassant pas 5 L/min d’oxygène au masque à moyenne concentration à J7 de la randomisation (soit J14 des symptômes ±5 jours). Ce critère permet de déterminer objectivement la gravité de…	C	P	S
EUCTR2020-001156-18-ES	Efficacy of different treatments in patients infected with COVID-19	Primary end point(s): Discharge from the patient or death;Timepoint(s) of evaluation of this end point: The main result is all-cause mortality, subdivided by disease severity at the time of randomization.;Main Objective: Provide reliable estimates of the effects of these antiviral treatments on hospital mortality.;Secondary Objective: The secondary objectives are to evaluate the effects of these …	M	P	H
EUCTR2020-001530-35-ES	Clinical trial to avoid infection by SARS-CoV-2 in high-risk population. COVID-19	Timepoint(s) of evaluation of this end point: 16 weeks;Primary end point(s): Number of symptomatic infections confirmed by SARS-CoV-2 (COVID-19);Secondary Objective: o Evaluate the efficacy of melatonin in the prevention of asymptomatic SARS-CoV-2 infections (COVID-19).<br>o To evaluate the efficacy of melatonin in preventing the development of severe COVID-19 in participants who acquire the infe…	C	P	P
EUCTR2020-001303-16-FR	Efficacy of Hydroxychloroquine, Telmisartan and Azithromycin on Survival in Elderly Hospitalized Patients with VIDOC-19 : A Randomized, Multi-Centre, Adaptive, Blinded Study	Main Objective: The main objective of this study is to evaluate the survival interest of Hydroxychloroquine 400 mg, Telmisartan 80 mg, Azithromycin 500 mg and Curcumin 800 mg daily on the survival of elderly patients with VIDOC-19 at 2 weeks from the start of treatment.;Secondary Objective: To evaluate adverse events, and particulary serious adverse avent.<br>ToEvaluate the effectiveness of diffe…	M	P	H
EUCTR2020-001437-12-ES	Random, controlled, open, one-site clinical trial in adult patients with COVID-19 severe pneumonia treated with immunomodulatory drugs	Timepoint(s) of evaluation of this end point: Day 28 after treatment initiation;Primary end point(s): Mortality at day 28 after treatment initiation (proportion of patient died that day);Secondary Objective: To assess the impact of this strategy on the following variables: premature mortality (48 hours, 7 days and at hospital), mortality at intensive care unit, days of mechanical ventilation, vir…	M	P	H
EUCTR2020-001160-28-ES	Tocilizumab plus Pembrolizumab in COVID-19	Main Objective: To assess the efficacy –as determined by the proportion of patients with normalization of SpO2 =96%– of continued standard care together with tocilizumab plus pembrolizumab (MK-3475) in patients with COVID-19 pneumonia who are nonresponsive to frontline therapy within 48 hours from treatment initiation.;Secondary Objective: To assess the efficacy –as determined by:<br> the proport…	L	P	S
EUCTR2020-001602-34-FR	COvid-19 and Vitamin D supplementation: a multicenter randomized controlled Trial of high dose versus standard dose vitamin D3 in high-risk COVID-19 patients	Main Objective: Evaluer l’efficacité d’une forte dose de cholecalciferol 400 000 UI per os en une fois versus une dose standard de 50 000 UI per os en une fois sur le taux de décès à 14 jours (J14) chez les patients âgés ayant ;Secondary Objective: 1) Evaluer l’efficacité de la forte dose de cholecalciferol versus la dose standard sur : <br>2) Evaluer la tolérance de la forte dose de cholecalcife…	M	P	H
EUCTR2020-001587-29-ES	Preventing SARS-CoV-2 virus infection and severity of COVID-19 diseases during pregnancy with hydroxychloroquine	Timepoint(s) of evaluation of this end point: Day 14 after treatment initiation;Primary end point(s): - The mean reduction in viral load at day 14 after recruitment among those women infected by SARS-CoV-2, in the ITT and ATP cohorts, adjusted by age, gravidity, region(municipality) and other variables associated with the prevalence and viral load of SARS-CoV-2 infection. <br>- The comparison of …	V	Q	S
EUCTR2020-001367-88-DK	Efficacy and safety of novel treatment options for adults with COVID-19 pneumonia	Main Objective: The aim of this study is to evaluate the efficacy and safety of convalescent anti-SARS-CoV-2 plasma, hydroxychloroquine, sarilumab and baricitinib compared with placebo in combination with standard of care (SOC) for the treatment of moderate-to-severe COVID-19 pneumonia on the basis of the composite endpoint: All-cause mortality or need of invasive mechanical ventilation up to 28 …	C	P	H
EUCTR2020-001321-31-ES	Clinical trial phase II to evaluate the efficacy of 3 types of treatment in patients with pneumonia by COVID-19	Main Objective: To compare and evaluate the efficacy of 3 treatment regimens (Hydroxychloroquine in combination with baricitinib, imatinib or lopinavir / ritonavir) in SARS-CoV-2 patients with severe pneumonia requiring admission, considering primary efficacy as time to clinical improvement.;Primary end point(s): 8.1 Demographics<br>Age<br>Sex<br>Tobacco<br>Alcohol<br>Significant comorbidity<br>-…	NA	NA	NA
EUCTR2020-001682-36-ES	Treatment of COVID-19 with allogeneic mesenchymal cells (MSV®).	Timepoint(s) of evaluation of this end point: 7 days from treatment and 28 days from diagnosis;Primary end point(s): 1. Proportion of patients in whom removal of invasive mechanical ventilation has been achieved in less than 7 days after IMP administration.<br>2. Proportion of patients surviving on day 28 from diagnosis;Secondary Objective: 1. Time to recover from the symptoms and clinical signs …	C	P	S
EUCTR2020-001331-26-GB	Preventative Drug Treatment for COVID-19 Infectious Disease	Main Objective: The principle research objective is to determine whether giving the drug Hydroxychloroquine increases time to COVID-19 disease in healthy frontline healthcare workers compared to giving a placebo.;Secondary Objective: • To determine whether giving hydroxychloroquine daily versus weekly decreases time to COVID-19 disease in healthy frontline healthcare workers<br>• To compare the n…	V	P	P
EUCTR2020-001634-36-ES	Randomized open pilot study to evaluate the efficacy of subcutaneous sarilumab in patients with moderate-severe COVID-19 infection.	Main Objective: -To evaluate the efficacy of the early administration of sarilumab subcutaneously in patients with moderate-severe COVID-19 infection in early stages compared to the current treatment standard.<br>-To compare the baseline clinical and biological parameters, including serum IL-6, of the intervention population against historical controls, to search for possible markers that identif…	C	P	S
EUCTR2020-001413-20-ES	Efficacy and safety of siltuximab vs. corticosteroids in hospitalized patients with COVID-19 pneumonia	Main Objective: To assess the efficacy of siltuximab vs corticosteroids in hospitalized patients with COVID19 pneumonia by evaluating the number of admissions in the unit intensive care (ICU);Secondary Objective: -Stay in the ICU<br>-Time to resolution of fever for at least 48 hours, without administration of antipyretics<br>-Incidence of worsening in the oxygen therapy requirement <br>-Duration …	C	P	S
EUCTR2020-001266-11-ES	Clinical trial of administration of MSC to patients with respiratory distress type COVID-19	Timepoint(s) of evaluation of this end point: Day 1, Day 3, Day 7, day 10, Third Month, Sixth Month;Primary end point(s): ?% survival at 28 days after treatment<br>? Days from the patient enters the study until the temperature normalizes: measured on Day 1, Day 3, Day 7, Day 10, 3rd month and 6th month.<br>o Normalization of the temperature defined as: reaching a body temperature between 35ºC and…	M	P	H
EUCTR2020-001689-12-ES	COLCHICINA TEST IN THE SARS-COV2 CORONAVIRUS (COLCORONA-COVID-19)	Main Objective: The main objective of this study is to determine if short-term treatment with colchicine reduces the mortality rate and lung complications related to COVID-19.;Secondary Objective: The secondary objective is to determine the safety of colchicine treatment in this patient population.;Primary end point(s): The primary endpoint will be a composite endpoint of death or need for hospit…	C	P	H
EUCTR2020-001765-37-ES	Pragmatic clinical trial of hydroxychloroquine in the treatment of oncohematological patients and health professionals with COVID-19 infection without radiological alteration.	Main Objective: To determine the efficacy of hydroxychloroquine in the treatment of SARS-COV2 infection in oncohaematological patients without radiological alteration and SARS-COV2 positive professionals without radiological alteration.;Secondary Objective: Evaluate the toxicity profile of the treatment.;Primary end point(s): Percentage of patients (cohort A) and professionals (cohort B) who achi…	C	P	S
EUCTR2020-001448-24-GB	Preventing Pulmonary Complications in Surgical Patients at Risk of COVID-19	Timepoint(s) of evaluation of this end point: Up to 30 days following surgery;Primary end point(s): Trial outcomes will only be based on routinely available data. Patients will not undergo any additional investigations for trial purposes.<br><br>Primary outcome measure<br>The primary outcome is any one of the following COVID-19 specific, inpatient, postoperative pulmonary complications (definitio…	C	P	P
EUCTR2020-001511-25-ES	Randomized open-blind controlled trial to study the benefit of Colchicine in Patients with COVID-19	Timepoint(s) of evaluation of this end point: END OF STUDY;Primary end point(s): 1. Ordinal 7-point clinical evaluation scale (WHO R&D Blueprint expert group (31).<br>2. IL-6 concentrations, which together with the rest of the laboratory result variables will be measured together at the end of the study.;Secondary Objective: 1. Improvement of clinical status defined as time to reduction of at lea…	W	Q	S
EUCTR2020-001570-30-FR	ICAR (IgIV in Covid-related ARds)	Timepoint(s) of evaluation of this end point: 28 day delay;Primary end point(s): Survival without invasive ventilatory assistance (i.e. ventilator-free days) until D28. The score is calculated by summing the days on which the patient has not had a VM; but in the event of death before D28, the score is zero. The 28-day delay was recommended because the average duration of VM for post-SARS-CoV-2 AR…	C	P	S
EUCTR2020-001466-11-GR	Prevention of severe respiratory failure in Covid-19	Timepoint(s) of evaluation of this end point: Day 14;Primary end point(s): This is defined on day 14 as the percentage of patients who will not experience SAIs (as defined in Annex V). Patients who die before the day 14 visit are considered to have failed at the primary endpoint.;Secondary Objective: Not applicable;Main Objective: Recent data coming from the Hellenic Sepsis Study Group reveal tha…	C	P	T
EUCTR2020-001379-34-ES	Sedation with sevoflurane versus propofol in patients with Acute Respiratory Distress Syndrome caused by COVID-19 infection	Secondary Objective: - to quantify the effects of sevoflurane on pro-inflammatory cytokine levels during ARDS-CoVid19 <br>- evaluate the 30-day mortality.;Primary end point(s): Efficacy will be assessed according to the defined objectives of oxygenation, reduction of inflammatory markers;Timepoint(s) of evaluation of this end point: 2 days - PaO2/FiO2 and TNF, IL-1b, IL-6 e IL-8 día 2.;Main Objec…	L	Q	S
DRKS00021214	Improvement of the nutritional status regarding nicotinamide (vitamin B3) and the course of COVID-19 disease	Frequency of hospitalization with a continuous oxygen requirement of at least 24 hours.<br><br>Control calls are scheduled for week 0, week 2, week 4 and week 6. In UKSH patients, as part of the Global Consent residual materials serum and stool are preserved for exploratory analyzes of the serum levels of tryptophan, tryptophan metabolites and neopterin and the composition of the stool microbiome.	C	P	S
DRKS00021420	Observational clinical trial for the evaluation of an automated nasal and pharyngeal swab exam to test COVID-19 patients	Equivalence of the method measured by correlation of the smear result	L	O	D
DRKS00021153	get.calm and move.on – tackling worries and finding strength for the crisis (COVID-19) in 10 steps	Worry: Penn State Worry Questionnaire: Meyer, T. J., Miller, M. L., Metzger, R. L. & Borkovec, T. D. (1990). Development and validation of the Penn State Worry Questionnaire. Behaviour Research and Therapy, 28, 487-495. (t1, t2, t3, t4)	O	Q	D
DRKS00021300	Cytokine adsorption in severe COVID-19 pneumonia requiring extracorporeal membrane oxygenation	IL-6 at 72 hours after initiation of vv-ECMO	L	Q	S
IRCT20170117032004N3	Effect of vitamin A in patients with COVID19	Hospitalization duration. Timepoint: until discharge from hospital. Method of measurement: Questionnaire.	C	T	S
DRKS00021301	An e-Mental Health Intervention to Support burdened People in Times of the COVID-19 pandemic: CoPE It	The primary outcome is the changed experience of anxiety, measured with the Generalized Anxiety Disorder Scale [GAD-7] (Spitzer, Kroenke, Williams, & Löwe, 2006) at measurement time T1.	O	Q	O
IRCT20200310046736N1	Comparison of The Therapeutic Effect of Convalescent Plasma and Plasma-derived Immunoglobulin-enriched solution on COVID-19 Patients	Normal CT Scan. Timepoint: About 7-14 days after starting the treatment. Method of measurement: Result of CT scan.;Negative result for COVID-19 RT-PCR test. Timepoint: About 7-14 days after starting the treatment. Method of measurement: Results of qRT-PCR test.;Primary outcome: complete remission of clinical signs of disease. Timepoint: About one week after starting the treatment. Method of measu…	R	O	S
IRCT20151113025025N3	Clinical Trial of renin-angiotensin-aldosterone system inhibitors with halting their administration and the effect on clinical outcomes of patients with corona virus disease-2019 (COVID-19) referring to Sina Hospital in 2020	Death. Timepoint: 3 months. Method of measurement: Number of deceased patients.	M	P	H
IRCT20131113015393N6	Effect of Benson Relaxation on Quality of Life and job stress in nurses	Job stress. Timepoint: Before the intervention, one month after intervention. Method of measurement: Job Stress Questionnaire Osipow.;Quality of working life. Timepoint: Before the intervention, one month after intervention. Method of measurement: Work-Related Quality of Life questionnaire.	O	Q	O
IRCT20200312046749N1	Efficacy of Tumor Necrosis Factor alpha inhibitor in COVID-19	Improvement of pulmonary manifestations and the duration. Timepoint: One week, two weeks and 6 months after. Method of measurement: physical examination, labratory data and CT scan.;Improvement the radiologic parameters. Timepoint: after 7-10 days. Method of measurement: computed tomography.;Necessity and Duration to ICU admission and hospitalization. Timepoint: One to two weeks later. Method of …	C	P	S
CTRI/2020/04/024479	Study of the effect of Chloroquine in addition to standard therapy in COVID-19 patients	number of days of hospitalizationTimepoint: discharge	C	T	S
IRCT20140911019125N6	The effect of dental pulp mesenchymal stem cells in treatment of corona disease	Pulmonary Condition. Timepoint: Before intervention and 14, 28 days after intervention. Method of measurement: CT scan.;Expression of nucleic acid of virus. Timepoint: Before intervention and 14 and 28 days after intervention. Method of measurement: real time PCR.;Lymphocytes count. Timepoint: Before intervention and 14 and 28 days after intervention. Method of measurement: Flowcytometry.;Patient…	R	O	S
CTRI/2020/03/024402	Hydroxy Chloroquine, in open labelled, Randomised intervention for prevention of new infection and adverse outcomes following COVID-19 infection -A Tertiary Hospital based study	Infected Non infectedTimepoint: Time to clinical improvement	C	T	S
IRCT20160316027081N1	Effect of Licorice in COVID-19	Patient discharge. Timepoint: Daily. Method of measurement: Yes or no.;Increase or decrease of respiratory rates more than 25% of primary respiratory rate. Timepoint: Daily. Method of measurement: Respiratory rate in minute.;Myocardial Infarction or unstable angina. Timepoint: Daily. Method of measurement: Yes or no.;Rising of creatinine more than 25% primary creatinine. Timepoint: Daily. Method …	C	Q	S
CTRI/2020/04/024659	Study of Shreepad Shree Vallabh SSV Formulation to improve immunity in quarantine patients of COVID-19	Improvement in ambulatory patients who are assessed daily for symptoms which include cough, fever with or without chills and difficulty in breathing for the period they are in quarantine. <br/ ><br> <br/ ><br>Timepoint: Baseline, telephonically everyday and day 15.	C	P	S
IRCT20200317046797N1	Effect of Camostate mesylate on the outcome of Coronavirus (COVID-19)-induced pneumonia	Lung symptoms. Timepoint: At baseline (before intervention) and after drug administration. Method of measurement: Lung CT scan.;Hospitalization period. Timepoint: At baseline and discharge time. Method of measurement: Counting the day.;Mortality rate. Timepoint: At baseline and discharge time. Method of measurement: Observation.;Need for intubation. Timepoint: At baseline and discharge time. Meth…	R	O	S
IRCT20120826010664N6	Effect of hydroxychloroquine on prevention of covid-19 virus	Covid-19 infection. Timepoint: One, two and three months after starting the drug. Method of measurement: Covid-19 PCR test and clinical symptoms.	V	Q	S
IRCT20150303021315N17	Tocilizumab in COVID-19	The proportion of participants with clinical response (normalization of fever and oxygen saturation through day 14). Fever normalization: Temperature <36.6 °C armpit, <37.2 °C oral, or <37.8 °C rectal, sustained for at least 24 hours; Oxygen saturation normalization: peripheral capillary oxygen saturation (SpO2) > 94% sustained for at least 24 hours. Timepoint: day 1 through 14. Method of measure…	C	P	S
IRCT20140528017891N8	The effect of stem cell transplantation in the treatment of COVID-19	Death. Timepoint: Up to 28 days after starting the study. Method of measurement: Patient observation and evaluation of vital signs.	M	P	H
IRCT20190727044343N1	?Effect of febuxostat against coronavirus	CT-scan findings. Timepoint: Before the intervention and 2 weeks after the intervention. Method of measurement: CT-scan.	R	O	S
IRCT20200324046850N3	The effect of naproxen on the healing process of patients with COVID-19	Fever. Timepoint: At the time of positive test and 14 days later. Method of measurement: Using oral thermometer.;Cough. Timepoint: At the time of positive test and 14 days later. Method of measurement: Clinical observation and examination.;Chills. Timepoint: At the time of positive test and 14 days later. Method of measurement: Clinical observation and examination.;Night sweats. Timepoint: At the…	C	P	S
IRCT20200314046764N1	Pirfenidine in SARS-COV2	The scales of pulmonary involvement changes according to the scoring system defined, based on high resolution pulmonary computed tomography before and after the interventions. Timepoint: At visit 1 and then after 14 days. Method of measurement: Defined scoring system based on pulmonary involvement in high resolution pulmonary CT scan; score one: involvement in less than 5% of a lobe of a lung. Sc…	R	Q	S
IRCT20200324046847N1	Treatment of patients with Corona virus infection	Number of admission days. Timepoint: every day. Method of measurement: Number of days.;The mortality rate in COVID-19 patients. Timepoint: Everyday. Method of measurement: Number of death.;Assessment of potential side effects. Timepoint: Every day. Method of measurement: Inspection for potential side effects.	C	T	S
IRCT20140617018126N2	Persian Medicine Products in Covid-19	Oxygen saturation. Timepoint: Clinical examination and Pulse Oximetry before starting medication and regularly during treatment. Method of measurement: Pulse Oximeter.;Respiratory Rate. Timepoint: Clinical examination before starting medication and regularly during treatment. Method of measurement: respiratory Count.	C	Q	S
IRCT20150914024017N1	ReciGen for treatment of Covid-19	Hospital stay. Timepoint: discharge date. Method of measurement: checklist.;Need for ICU admission. Timepoint: discharge date. Method of measurement: check list based on treating clinicians judgment.;Need for intubation. Timepoint: discharge date. Method of measurement: check list based on treating clinicians judgment.	C	T	S
IRCT20180923041093N3	Efficacy of the myrtle syrup in the treatment of novel corona	Temperature. Timepoint: 0-1-2-3-4-7-14 days after starting intervention. Method of measurement: Termometer.;Cough (severity-frequency). Timepoint: 0-1-2-3-4-7-14 days after starting intervention. Method of measurement: Fisman Cough Severity Score.;Weakness. Timepoint: 0-1-2-3-4-7-14 days after starting intervention. Method of measurement: Asking patients using visual analog scale (VAS).;Muscular …	C	Q	S
IRCT20190727044343N2	Atorvastatin effect on COVID-19	CRP level in Blood. Timepoint: At the beginning of the study at after 5 consecutive days. Method of measurement: Blood sampling and CRP measuring.	L	Q	S
IRCT20160310026998N10	Study of the metformin effect on the survival and recovery rate of patients with COVID-19	Decreased mortality. Timepoint: 2 weeks. Method of measurement: observation.;Decreased need to hospitalization. Timepoint: 2 weeks. Method of measurement: obsevation.	M	P	H
IRCT20200321046828N1	Remedy of human coroviruse infection with genetic nanocomposit drug	The treatment of patients with corona infection. In healthy subjects the CT image of the lungs signs an improvement of the corona contamination. Timepoint: At the beginning of the test, positive people are determined based on who tests and then the severity of disease is classified through fever and CT-pulmonary image. Then, after 8-10, the initial cases including fever and CT lungs, as well as g…	R	O	S
IRCT20180610040049N3	The effect of Trachyspermum copticum syrup on clinical manifestations of patients with COVID-19	Level of CRP in serum. Timepoint: One day before the intervention and one day after the intervention is measured. Method of measurement: Using the ELISA technique.;The rate of lung inflammation. Timepoint: One day before the intervention and one day after the intervention is measured. Method of measurement: CT SCAN.	L	Q	S
IRCT20200325046860N1	Convalescent Plasma therapy for COVID-19 Patients	Improving Respiratory function of patients. Timepoint: Every 24 hours. Method of measurement: Clinical and, Para-clinical.	C	P	S
IRCT20200324046850N2	Comparison of the effect of Sofosbuvir + Daclatasvir (Sovodac) and Ribavirin in Covid-19	Number of people recovering from medication. Timepoint: 14 days. Method of measurement: Improve symptoms.	C	P	S
IRCT20200324046852N1	Comparison of efficacy of oral Levamisole and Formoterol+Budesonide inhaler with standard treatment of Corona infection.	Response to treatment in Lymphocytes count. Timepoint: Daily. Method of measurement: By apparatus in diagnostic lab.;Response to treatment for COVID-19 specific PCR test. Timepoint: Days 0-3-7. Method of measurement: Using PCR apparatus.;Response to treatment in O2 level and CO2 level in ABG or VBG test. Timepoint: Daily. Method of measurement: By apparatus in diagnostic lab.;Chest CT-Scan respon…	L	Q	S
IRCT20171122037571N2	Remdesivir in treatment of COVID-19	Time to Clinical Improvement (TTCI): TTCI is defined as the time (in days) from initiation of study treatment until a decline of two categories from admission status on a six-category ordinal scale of clinical status which ranges from 1 (discharged) to 6 (death).6. Death; 5. ICU, requiring ECMO and/or IMV; 4. ICU/hospitalization, requiring NIV/ HFNC therapy;3. Hospitalization, requiring supplemen…	C	T	S
IRCT20151227025726N13	Evaluation the Efficacy and Safety of Tocilizumab in COVID-19	Fever. Timepoint: Daily. Method of measurement: Thermometer.;Cough. Timepoint: Daily. Method of measurement: Observation.;Dyspnea. Timepoint: Daily. Method of measurement: Observation.	C	P	S
IRCT20140907019073N4	Evaluation of the effectiveness of Ipecac homeopathic remedy in control of Clinical manifestations of COVID-19	Serum CRP. Timepoint: The first day, the second day, the third day. Method of measurement: Blood test.;Number of lymphocytes. Timepoint: The first day, the second day, the third day. Method of measurement: Blood test.;O2 arterial blood saturation. Timepoint: The first day, the second day, the third day. Method of measurement: Pulse Oximeter Report.;Myalgia. Timepoint: The first day, the second da…	L	Q	S
IRCT20200324046850N1	Comparison of vitamin D3 and N-acetylcysteine prescription in COVID-19 patients and their effect on recovery process	Night sweats. Timepoint: Time to get the Corona test positive _14 days after test positive. Method of measurement: Clinical observation and examination.;Chills. Timepoint: Time to get the Corona test positive _14 days after test positive. Method of measurement: Clinical observation and examination.;Cough. Timepoint: Time to get the Corona test positive _14 days after test. Method of measurement: …	C	P	S
IRCT20170611034452N11	Investigating the effectiveness of psychological interventions on mental health	Anxiety,. Timepoint: Before the intervention, immediately after the intervention. Method of measurement: Health Anxiety Assessment Questionnaire.;Depression. Timepoint: Before the intervention, immediately after the intervention. Method of measurement: Hospital Anxiety-Depression Index Questionnaire.	O	Q	O
IRCT20160310026998N11	Effect of metformin in COVID-19 symptom improvement and death	Decreased hospitalization period. Timepoint: at baseline and discharge time. Method of measurement: counting the day.;Mortality rate. Timepoint: at baseline and discharge time. Method of measurement: observation.;Decreased need for intubation. Timepoint: at baseline and discharge time. Method of measurement: observation.	C	T	S
IRCT20190804044429N1	Interferon beta 1b in COVID-19	Clinical response to therapeutic regimen by respiratory rate. Timepoint: Daily. Method of measurement: physical exam.;Clinical response to therapeutic regimen by blood oxygen saturation. Timepoint: daily. Method of measurement: pulse oximeter.;Clinical response to therapeutic regimen by fever. Timepoint: daily. Method of measurement: thermometer.;Therapeutic regimen safety. Timepoint: daily. Meth…	C	Q	S
IRCT20200323046841N1	Efficacy evaluation of an herbal compound in COVID-19	Changing the patient's clinical status in the COVID-19 clinical classification table. Timepoint: Before and after intervention. Method of measurement: Clinical and Paraclinical Indicators in COVID-19 Classification Table.	W	Q	S
IRCT20200324046850N5	Study of the effect of vitamin C in patients with Covid-19	Number of hospital days. Timepoint: Daily since hospitalization time. Method of measurement: Based on patient's file.	C	T	S
IRCT20200204046369N1	Effect of Methylprednisolone in treatment of COVID-19 patients	PAO2/fio2. Timepoint: 5 days after intervention. Method of measurement: ABG.	L	Q	S
IRCT20190917044805N2	Effects of High-dose Vitamin C on COVID-19	Time to clinical improvement (TTIC). Timepoint: day 0, 5, at discharge. Method of measurement: assessing respiratory rate, blood oxygen saturation, fever.;Time to clinical improvement (TTIC) of NEWS2 (National Early Warning Score 2) of 0 maintained for 24 hours. Timepoint: day 0, 5, at discharge. Method of measurement: NEWS2 (National Early Warning Score 2) questionaire.	C	T	S
IRCT20180712040449N2	Effect of oral multi-herbal preparation on COVID-19	O2 saturation percentage. Timepoint: Clinical examination and pulse oximetry at baseline, days 3, 6, 9, 12 and 14. Method of measurement: Pulse Oximeter.;Lung inflammation. Timepoint: CT scan at baseline, days 7 and 14. Method of measurement: CT scan.	C	Q	S
IRCT20160313027033N2	The effect of MCT Oil on COVID-19	Temperature. Timepoint: 0-1-2-3-14 days after starting intervention. Method of measurement: Thermometer.;Cough (severity-frequency). Timepoint: 0-1-2-3-14 days after starting intervention. Method of measurement: Fisman Cough Severity Score.;Weakness. Timepoint: 0-1-2-3-14 days after starting intervention. Method of measurement: Asking patients using visual analog scale (VAS).;Respiratory rate. Ti…	C	Q	S
IRCT20120225009124N4	Efficacy of dexamethasone, IV-IG and Interferone beta for treatment of patients with severe COVID-19	Improvement in SpO2 (increasing in level of SpO2 to levels higher than 90%). Timepoint: After finishing the intervetion. Method of measurement: By Pulse oximeter.	C	Q	S
IRCT20200317046797N2	Effect of Fingolimod for treatment of COVID-19-induced cytokine storm	Improvement of the symptoms of lung, pulmonary infiltrates. Timepoint: At baseline (before intervention) and 2 day after drug administration. Method of measurement: Lung CT scan.;Decreased hospitalization period. Timepoint: At baseline and discharge time. Method of measurement: counting the hospitalization days.;Mortality rate. Timepoint: At baseline and discharge time. Method of measurement: obs…	C	P	S
IRCT20200318046812N1	Comparison of the safety and efficacy of Favipiravir and kaletra in COVID-19	Admission to intensive care unit. Timepoint: Once (when admitted to intensive care unit). Method of measurement: Hospital records.	C	P	S
IRCT20200325046859N1	The efficacy of intravenous immunoglobulin (IVIg) in patients with severe COVID-19 who have not responded to standard three-drug protocol	Fever. Timepoint: before and after treatment. Method of measurement: Thermometer.;Respiration rate. Timepoint: before and after treatment. Method of measurement: counting the number of breaths patients take per minute.;Findings of chest CT scan. Timepoint: before and after treatment. Method of measurement: CT scan machine.;Pulse. Timepoint: before, during and after treatment. Method of measuremen…	C	P	S
IRCT20151228025732N51	Effect of Algomed, Menta longifolia, Chamomile, Althaea rosea, Malva sylvestris, Lepidium sativum supplements on the Severity and Consequences of Coronavirus 19 disease (COVID-19)	Clinical symptoms (Coronavirus infection). Timepoint: Before starting the study and daily until discharge. Method of measurement: Laboratory values and radiographic changes or CT scans.	C	P	S
IRCT20200325046860N2	Mesenchymal Stem Cell therapy in COVID19	Respiratory function of patients. Timepoint: Every 24 hours after MSC infusion. Method of measurement: Clinical, lab test , CT scan.	C	P	S
IRCT20180923041093N4	Efficacy of the barley-based remedy in the treatment of novel corona	Temperature. Timepoint: 0-1-2-3-4-7-14 days after starting intervention. Method of measurement: Termometer.;Cough (severity-frequency). Timepoint: 0-1-2-3-4-7-14 days after starting intervention. Method of measurement: Fisman Cough Severity Score.;Weakness. Timepoint: 0-1-2-3-4-7-14 days after starting intervention. Method of measurement: Asking patients using visual analog scale (VAS).;Muscular …	C	P	S
IRCT20150704023055N2	Hemoperfusion in patients with COVID-19	Improving the general condition of the patient. Timepoint: Before intervention and one week after the third session of hemoperfusion. Method of measurement: No need to receive any intensive respiratory care in the patient.	C	P	S
IRCT20200328046886N1	The effectiveness of Sovodak (sofosbuvir+daclatasvir) in Covid-19 patients	Need of invasive and non invasive mechanical ventilation ,need of oxygen supplement , the median time for recovery and well-being. Timepoint: daily in all duration of study. Method of measurement: By designed investigator checklist.	C	T	S
IRCT20081019001369N2	Effect of berberine on COVID-19	Time interval until clinical symptoms improve. Timepoint: 3 days, 1 week and 2 weeks after treatment. Method of measurement: time of recovery.	C	T	S
IRCT20200319046819N1	supplementation in COVID-19	WBC, CRP, IL6,TNF-a, IFN-G ? ESR. Timepoint: Before and after intervention. Method of measurement: Laboratory blood test.;Intensity of pulmonary involvement. Timepoint: Before and after intervention. Method of measurement: CT scan.;Mortality. Timepoint: Before and after intervention. Method of measurement: Observation.	L	Q	S
IRCT20200322046833N1	Umifenovir effectiveness in the treatment of COVID-19	Clinical improvement includes fever rupture. Timepoint: Since admission to the hospital then daily monitoring. Method of measurement: Physical examination, thermometer, questionnaire.;Clinical improvement includes SPO2 >93%. Timepoint: Since admission to the hospital then daily monitoring. Method of measurement: Physical examination, pulse oxymetery,questionnaire.;Improvement of respiratory sympt…	C	P	S
IRCT20130917014693N10	Evaluation the effects of Hydroxychloroquine administration for COVID-19 prophylaxis	Fever. Timepoint: Daily. Method of measurement: Thermometer.;Cough. Timepoint: Daily. Method of measurement: Questionnaire.;Dyspnea. Timepoint: Daily. Method of measurement: Questionnaire.;Sore throat. Timepoint: Daily. Method of measurement: Questionnaire.;Myalgia. Timepoint: Daily. Method of measurement: Questionnaire.	C	P	S
IRCT20200404046933N1	Evaluation the effect of licorice for treatment of coronavirus	Time interval until clinical symptoms improve. Timepoint: 3 days, 1 week and 2 weeks after treatment. Method of measurement: Time of recovery.;Lymphopenia. Timepoint: 3 days, 1 week and 2 weeks after treatment. Method of measurement: Cell counter device.;CRP level. Timepoint: 3 days, 1 week and 2 weeks after treatment. Method of measurement: CRP kit.	C	T	S
IRCT20200404046934N1	Investigation of the effect of Zufa syrup on clinical symptoms in the with suspected Corona (COVID-19)	Clinical signs Includes oxygen saturation, temperature, blood pressure, respiration rate, heart rate. Timepoint: During 10 days of treatment and 5 days after treatment. Method of measurement: Individual profile and follow-up questionnaire.;Oxygen levels. Timepoint: During 10 days of treatment and 5 days after treatment. Method of measurement: Oximeter.	C	P	S
IRCT20160131026298N2	The effect of PHR spray on patients with coronavirus-19	Measurement of cough severity. Timepoint: Day 1 before and at the end of treatment. Method of measurement: Standard cough questionnaire.;Severity of shortness of breath. Timepoint: Day 1 before and at the end of treatment. Method of measurement: Shortness Of Breath With Daily Activity (SOBDA) Questionnaire.;Lung radiologic changes. Timepoint: At beginning and end of the study. Method of measureme…	C	P	S
IRCT20200401046909N1	Evaluation of the efficacy of oral 25-hydroxyvitamin D3 on COVID-19	Infection duration. Timepoint: during study. Method of measurement: WHO criteria.	W	Q	S
IRCT20101219005416N2	Evaluation of the effect of traditional Iranian medicine product on improvement of clinical menifestation of COVID -19	Response to the treatment (Significant clinical improvement). Timepoint: At baseline and daily. Method of measurement: According to the clinical, paraclinical and laboratory findings. Clinical improvement: normalization of the body temperature (=37.2 ° C), respiratory rate (=24 breaths per minute), oxygen saturation (> 94% at room temperature) and cough ; dyspnea ; headche and dirrhea that will m…	C	P	S
IRCT20200402046923N1	Effect of herbal capsule, Viroherb, and herbal syrup, Fenugreek in treatment of COVID-19	Body temperature. Timepoint: At the beginning of the study and on day 6. Method of measurement: thermometer.;Adverse events. Timepoint: whole duration of study. Method of measurement: type and number of adverse event.;Cough. Timepoint: At the beginning of the study and on day 6. Method of measurement: clinical judgement of physician.;Dyspnea. Timepoint: At the beginning of the study and on day 6.…	C	Q	S
IRCT20130306012728N8	Post-exposure hydroxycloroquine prophylaxis for Covid 19	Incidence of clinical symptoms of COVID-19 disease (especially pulmonary involvement) among people who are asymptomatic when entering the study. Timepoint: At the beginning of the study and 7, 14 and 21 days after the start of the intervention. Method of measurement: The number of cases with clinical symptoms, especially cases of pulmonary involvement in a period of 21 days among the participants…	C	P	P
IRCT20200405046960N1	Efficacy of Kelofan syrup on COVID-19	Oxygen saturation. Timepoint: Clinical examination and Pulse Oximetry before starting medication and regularly during treatment. Method of measurement: Pulse Oximeter.;Respiratory Rate. Timepoint: Clinical examination before starting medication and regularly during treatment. Method of measurement: Respiratory Count.	C	Q	S
IRCT20130812014333N145	Comparative assessment of the efficacy and safety of add ontreatment with “Sofosbuvir standard of care therapeutic regimenVelpatasvir” to “standard of caretherapeutic regimen” in patients with COVID-19	Clinical status. Timepoint: Beginning of the study, 10 days later, or discharge time. Method of measurement: By a doctor.	C	P	S
IRCT20180429039463N2	The Impact of Family-Based Empowerment Model on Stress, Anxiety and Satisfaction	Stress. Timepoint: Stress will be measured once before the first intervention and once after the last intervention session. Method of measurement: Doss Stress Questionnaire.	O	Q	O
IRCT20200404046935N1	Effect of herbal medicine containing Saatar, Hofarigon and Fennel on COVID-19 patients	Fever. Timepoint: Every day for 7 days. Method of measurement: termometer.;Lymphocyte count. Timepoint: Before and 7 days after intervention. Method of measurement: Cell counter device.;Erythrocyte sedimentation rate. Timepoint: Before and 7 days after intervention. Method of measurement: ESR device.	C	P	S
IRCT20200404046937N1	Evaluating the effect of Marshmallow and Licorice on COVID 19 patients	Viral diagnostic test. Timepoint: The first day of the study and the end of the study (10th day). Method of measurement: Polymerase chain reaction.	V	P	S
IRCT20200318046812N2	evaluation of Safety and efficacy of anti inflammatory regimens in COVID-19	Admission to intensive care unit. Timepoint: Once (when admitted to intensive care unit). Method of measurement: Hospital records.	C	P	S
IRCT20080901001157N16	Effect of IMFLUNA herbal compound on covid-19 pneumonia symptoms	Blood oxygen saturation. Timepoint: At beginning and regularly during study. Method of measurement: Pulse Oximeter.;Respiratory Rate. Timepoint: At beginning and regularly during study. Method of measurement: Respiratory Count.;Lung inflammation. Timepoint: At beginning and end of the study. Method of measurement: Chest CT scan.	C	Q	S
IRCT20151227025726N14	Evaluation the effects of Favipiravir in COVID-19 patients	Fever. Timepoint: Daily. Method of measurement: Thermometer.;Cough. Timepoint: Daily. Method of measurement: Observation.;Dyspnea. Timepoint: Daily. Method of measurement: Observation.	C	P	S
IRCT20200317046797N4	Effect of Bromhexine Hydrochloride on patients with COVID-19	Hospitalization days. Timepoint: At baseline and discharge time. Method of measurement: Counting the days.;Need for mechanical ventilation. Timepoint: From baseline to discharge time. Method of measurement: Observation and documents.;Condition of discharge (death or recovery). Timepoint: End of hospitalization. Method of measurement: Observation and documents.;Period of mechanical ventilation. Ti…	C	Q	S
IRCT20150808023559N20	Efficacy of hydroxychloroquine plus favipiravir drug regimen in comparison with hydroxychloroquine plus kaletra in hospitalized patients with COVID-19	Death. Timepoint: At the time of discharge from the hospital. Method of measurement: Patient medical records.	M	P	H
IRCT20200405046953N1	Comparison of therapies for COVID-19	Primary Outcome: All-cause mortality. Timepoint: Any time death or discharge of patients occurs. Method of measurement: Death certificate signed by hospital clinicians or discharge documents.	M	P	H
IRCT20161204031229N3	Evaluation the Effect of Ticoplanin in Patients With Coronavirus Disease	Measurement of inflammatory markers (CRP). Timepoint: at baseline and discharge time. Method of measurement: ELISA.;WBC count. Timepoint: at baseline and discharge time. Method of measurement: Blood count.;Evaluation of lung CT scan. Timepoint: at baseline and discharge time. Method of measurement: Radiologic finding.;Evaluation of inflammatory marker ESR. Timepoint: at baseline and discharge tim…	L	Q	S
IRCT20180802040678N4	Evaluation of the effects of Losartan in patients with corona virus disease 2019	Mortality. Timepoint: 28 days. Method of measurement: Number of death.;Performance of patients. Timepoint: Primary and 14 days after. Method of measurement: Sequential Organ Failure Assessment (SOFA) Respiratory Score.;Length of hospitalization. Timepoint: 28 days. Method of measurement: Days between admission to discharge.;Laboratory Findings. Timepoint: Primary and 14 days after. Method of meas…	M	P	H
IRCT20200405046958N1	Prevention of Novel Coronavirus Disease by Hydroxychloroquine in cancer patients.	COVID-19 incidence rate in cancer patients under treatment. Timepoint: Patients are examined and investigated if they become symptomatic during the 2 months of study. Method of measurement: First, a history and physical examination are performed for the symptoms of COVID-19, and if the test is positive, a computerized tomography scan of the lungs and a nucleic acid amplification test for the SARS…	V	P	P
IRCT20200217046526N1	Mesenchymal Stem Cell Therapy for Acute Respiratory Distress Syndrome in Coronavirus Infection	Adverse events assesment. Timepoint: At the same time of each intervention, 24 hours after each intervention, on days 6, 7, 14 and 28 after the first intervention. Method of measurement: Number of participants with treatment-related adverse events as assessed by CTCAE v4.0.	C	P	T
IRCT20180610040049N4	The effect of Tanacetum parthenium (L) Sch syrup on clinical manifestations of patients with COVID-19	Level of CRP in serum. Timepoint: One day before the intervention and one day after the intervention is measured. Method of measurement: Using the ELISA technique.	L	Q	S
IRCT20200401046909N2	Evaluation of the efficacy of oral 25-hydroxyvitamin D3 on COVID-19	Affected by COVID-19. Timepoint: Sign of COVID-19 during study. Method of measurement: COVID-19 positive by PCR.	V	P	S
IRCT20180725040596N2	Effect of Arbidol in treatment of COVID-19	Improvement of patients fever. Timepoint: Measurement of patient's body temperature at the beginning of the study and 7 days after starting treatment. Method of measurement: Thermometer.;Improvement of complete blood count test. Timepoint: Performing a complete blood cell count test at the beginning of the study and 7 days after starting treatment. Method of measurement: Blood test.;Improvement o…	C	P	S
IRCT20180129038542N1	Early tracheostomy in COVID-19	The oxygen blood saturation. Timepoint: Every 12 hours from the first day of hospitalization to the last day. Method of measurement: The pulse oximetry.;Respiratory rate. Timepoint: 0-1-2-3-4-7-14 days after starting intervention. Method of measurement: Counting the number of breaths per minute.;The mortality rate. Timepoint: 10, 20 days after starting intervention. Method of measurement: Countin…	C	Q	S
IRCT20180520039738N2	Evaluation and comparison of the effectiveness of standard treatment with stand treatment plus Vitamin A in treatment in covid19 patients	Body temperature. Timepoint: before the start of the intervention and 10 days after the supplement Vitamin A. Method of measurement: Measureing body temperature with a thermometer through the mouth.;Blood oxygen saturation percentage. Timepoint: Before and ten days after starting treatment. Method of measurement: Pulse oximeter.;Cough rate. Timepoint: Before and ten days after starting treatment.…	C	Q	S
IRCT20200317046797N3	Intravenous immunoglobulin (IVIG) in the treatment of COVID-19-induced cytokine storm	Improving the general condition of the patient. Timepoint: Before and after intervention. Method of measurement: Lung CT scan; No need to receive any intensive respiratory care in the patient.;Mortality rate. Timepoint: At baseline and discharge time or patient death. Method of measurement: Observation.;Need for intubation. Timepoint: Period of hospitalization. Method of measurement: Observation …	R	O	S
IRCT20200413047053N1	Evaluation the effect of asafoetida in the treatment of coronavirus infection	Lymphopenia. Timepoint: 3 days, 1 week and 2 weeks after treatment. Method of measurement: Cell counter device.	L	Q	S
IRCT20200404046947N1	Effect of Methylprednisolone on treatment of COVID-19	Radiographic features Findings. Timepoint: Before and after (at day 3, 7 and discharge time). Method of measurement: CT scan.;Mortality rate. Timepoint: Before and after. Method of measurement: Observation.;O2 saturation. Timepoint: Before and after (at day 3, 7 and discharge time). Method of measurement: Pulse Oximeter.;Need an oxygen therapy ?. Timepoint: Before and after (at day 3 and discharg…	R	O	S
IRCT20081019001369N3	Effect of crocetin on COVID-19	Time interval until clinical symptoms improve. Timepoint: 3 days, 1 week and 2 weeks after treatment. Method of measurement: time of recovery.	C	T	S
IRCT20200403046926N1	The effect of SOVODAK in the treatment of COVID-19 patients	Symptoms ending. Timepoint: During the study. Method of measurement: Clinical examination.;Lymphopenic Status. Timepoint: Before the intervention and the seventh day. Method of measurement: Counting lymphocytes.;C-reactive protein Status. Timepoint: Before the intervention and the seventh day. Method of measurement: C-reactive protein serological test.;Saturation of Peripheral Oxygen. Timepoint: …	C	P	S
IRCT20200408046990N1	Evaluation of SinaCurcumin capsule efficacy as an supplement therapy for mild to moderate COVID-19 in Mashhad	Fever. Timepoint: daily. Method of measurement: thermometer.;Clinical response to treatment (including improvement of cough, myalgia, headache, Olfactory and taste disorders). Timepoint: daily. Method of measurement: Based on clinical, paraclinical and laboratory findings.;Drug adverse reaction. Timepoint: daily. Method of measurement: patient interview and file.;Radiologic response. Timepoint: o…	C	P	S
IRCT20151228025732N53	Therapeutic effects of plasma of recovered people from COVID-19 on hospitalized patients with this disease	Checking the amount of ventilation. Timepoint: Before intervention, 30 minutes after each step of intervention and daily. Method of measurement: Artificial respirator or ventilator.;White blood cell count, CRP in patients with COVID-19. Timepoint: Every 24 hours (Before and after intervention). Method of measurement: Cell counter.;Percentage of T CD8 in peripheral blood. Timepoint: Before and aft…	C	P	S
IRCT20200317046797N5	Treatment of COVID-19-induced cytokine storm by hemoperfusion	The general condition of the patient. Timepoint: Before intervention and 1 day after final intervention. Method of measurement: Lung CT scan; No need to receive any intensive respiratory care in the patient.;Mortality rate. Timepoint: At baseline and discharge time or patient death. Method of measurement: Observation.;Need for intubation. Timepoint: Period of hospitalization. Method of measuremen…	R	O	S
IRCT20200406046965N1	The effect of elderberry syrup against COVID-19 symptoms	Fever. Timepoint: Days 3, 7 and 14 after the intervention beginning. Method of measurement: Thermometer.;Shortness of breath. Timepoint: Days 3, 7 and 14 after the intervention beginning. Method of measurement: Autosaturation device, Counting the number of breaths in 1 minute.;Coughs. Timepoint: Days 3, 7 and 14 after the intervention beginning. Method of measurement: Patient follow up.;Myalgia. …	C	P	S
IRCT20200217046526N2	Mesenchymal Stem Cell Therapy for Acute Respiratory Distress Syndrome in Coronavirus Infection	Adverse events assesment. Timepoint: At the same time of each intervention, 24 hours after each intervention, on days 6, 7, 14 and 28 after the first intervention. Method of measurement: Number of participants with treatment-related adverse events as assessed by CTCAE v4.0.;Blood oxygen saturation. Timepoint: At Baseline, simultaneously with each intervention and on days 5, 6, 7, 14 after the fir…	C	P	T
IRCT20200404046948N1	Efficacy and safety of convalescent plasma in the treatment of COVID-19	Clinical improvement within 14 days of admission. Timepoint: everyday. Method of measurement: Clinical improvement is defined as the patient's admission status of 6 grade scale score reduced by 2 points or patient discharge. (Clinical improvement was defined as a 2-point reduction or discharge of a 6-point scale for patient admission status. The 6-point scale includes: 6 points: death; 5 points: …	C	Q	S
IRCT20180923041093N5	Evaluation the efficacy of hot foot-bath on COVID-19	Temperature. Timepoint: Daily. Method of measurement: Thermometer.;Cough. Timepoint: Daily. Method of measurement: Fisman scale.;Respiratory rate. Timepoint: Daily. Method of measurement: Counting the number of breaths per minute.;Weakness. Timepoint: Daily. Method of measurement: Visual analog scale.;Muscular pain. Timepoint: Daily. Method of measurement: Visual analog scale.;C Reactive Protein …	C	Q	S
IRCT20081019001369N4	Effect of minocycline on COVID-19	Time interval until clinical symptoms improve. Timepoint: 3 days, 1 week and 2 weeks after treatment. Method of measurement: time of recovery.	C	T	S
IRCT20200411047025N1	Effect of Intravenous vitamin c in Patients with COVID-19	Improvement of SPO2 (stands for peripheral capillary oxygen saturation). Timepoint: Daily, until 3-5 days or discharge. Method of measurement: pulse oximetry.	C	Q	S
IRCT20080901001165N46	Investigating the efficacy and safety of Umifenovir in controlling the symptoms of patients with COVID-19	Respiratory symptoms (dry cough). Timepoint: Daily monitoring, but the result of baseline (before the initiation of intervention), and day 7 from the initiation, is recorded. Method of measurement: Physical examination,questionnaire.;Respiratory symptoms (respiratory distress). Timepoint: Daily monitoring, but the result of baseline (before the initiation of intervention), and day 7 from the init…	C	P	S
IRCT20200415047089N1	The effect of herbal drugs (Echinacea and Ginger) on Improvement of clinical symptoms and hospitalizations in suspected COVID-19 outpatient cases	Improvement of clinical symptoms. Timepoint: Start of study and 7 days after study. Method of measurement: Questionnaire - telephone follow-up and.	C	Q	S
IRCT20200408046992N1	Effect of Trifluoperazine in treatment of COVID-19	Determining the efficacy of trifluoprazine in improving the Clinical manifestations of patients with confirmed COVID-19 infection by recording the patient's clinical parameters including 7 clinical parameters of respiration number, Blood Oxigen Saturation, oxygen support, temperature, heart rate, systolic blood pressure and Awareness level, assessment of lung involvement with Chest CT-Scan, measu…	W	Q	S
IRCT20200415047092N1	The effect of azithromycin in treatment of COVID19	Peripheral capillary oxygen saturation. Timepoint: At the beginning of the visit and daily during admission. Method of measurement: pulse oximeter.;Admission duration. Timepoint: From the beginning of the hospital visit to the discharge. Method of measurement: Questionnaire.;Fever. Timepoint: At the beginning of the visit and daily during admission. Method of measurement: Mercury thermometer.;Nee…	C	Q	S
IRCT20200404046937N2	Evaluating the effect of Phyllanthus Emblica on COVID 19 patients	Viral diagnostic test. Timepoint: The first day of the study and the end of the study (10th day). Method of measurement: Polymerase chain reaction.	V	P	S
IRCT20191125045492N2	Effect of Ozone therapy in treatment of COVID-19	Quantitative CRP. Timepoint: Before and after the intervention. Method of measurement: Lab kit.;Oxygen Saturation. Timepoint: Before and after the intervention. Method of measurement: Pulse Oximetry.;Body's temperature. Timepoint: Before and after the intervention. Method of measurement: Thermometer.;Dyspnea. Timepoint: Before and after the intervention. Method of measurement: Subjective assessme…	L	Q	S
IRCT20200406046968N1	The effect of IL-6 inhibitor (Tocilizumab) on the prognosis of covid-19 patients with acute respiratory failure hospitalized in Imam Reza Hospital in Tabriz	Percentage of effect of Tocilizumab on COVID-19 patients. Timepoint: Patients receive the drug in a single dose over an hour, and resorption monitoring will be performed to improve oxygenation status and subsequent complications in vital organs of the heart, kidneys, CNS, hemodynamic disturbances, duration of mechanical ventilation, and eventual mortality. Method of measurement: Clinical and labo…	C	P	S
IRCT20200409047007N1	Effect of COVID 19 survivors plasma in COVID 19 patients with ARDS	Mortality rate in first month from the time of entry into the study. Timepoint: The first month of entering the study. Method of measurement: Continuous clinical evaluation.	M	P	H
IRCT20190122042450N4	The effect of hydroxychloroquine to prevent coronavirus disease	Reduction of incubation time. Timepoint: Daily for 14 days. Method of measurement: Participants' clinical status.;Reducing the incidence of Symptomatic respiratory disease. Timepoint: 14 days after taking hydroxychloroquine. Method of measurement: CT-scan test.	C	T	S
PACTR202004693933092	Effectiveness of Measles Vaccine in Health Care Professionals During COVID-19 Outbreak (Randomized Controlled Trial)	Serologic evidence of infection	S	P	S
JPRN-jRCT2031190264	A Multicenter, Adaptive, Randomized Blinded Controlled Trial of the Safety and Efficacy of Investigational Therapeutics for the Treatment of COVID-19 in Hospitalized Adults	The overall objective of the study is to evaluate the clinical efficacy of different investigational therapeutics relative to the control arm in adults hospitalized with COVID-19.<br>-The primary objective will be determined by a pilot study of the first 100 subjects.<br>-Subject clinical status (8-point ordinal scale) at Day 15 is the default primary endpoint.	W	Q	S
IRCT20200411047030N1	The effect of melatonin on the quality of sleep in COVID-19 patients	Stop the fever. Timepoint: It will be reviewed for 7 days from the study onset. Method of measurement: It is recorded by a thermometer.;Transfer to ICU. Timepoint: A maximum of 10 days of hospitalization will be checked. Method of measurement: Tracking hospitalized patients through questions and recording in questionnaires.;Mortality. Timepoint: A maximum of 10 days of hospitalization will be che…	C	P	S
IRCT20200413047056N1	Comparison between the efficacy of intravenous immunoglobulin and convalescent plasma in COVID-19	Lung involvement in X-ray and CT-scan, SPO2, LDH enzyme, viral load, acute phase protein, white blood cell count, ESR, length of hospital stay, duration of mechanical ventilation. Timepoint: from the start of the intervention for 12 days. Method of measurement: Blood and biochemical factors are measured using laboratory tests by an autoanalyzer. Pulmonary function indicators are measured by pulse…	R	P	S
PACTR202004761408382	Efficacy and safety of IHP Detox Tea (a special blend of Andrographis paniculata, Garcinia kola and Psidium guajava) for treatment of Corona virus disease 2019 (COVID-19): a pilot placebo-controlled randomized trial	The mean time to negative test to COVID-19.;Presence of immune determinants.	V	T	S
JPRN-jRCTs031190269	A multicenter, open-label, randomized controlled trial to evaluate the efficacy and safety of inhaled ciclesonide for asymptomatic and mild patients with COVID-19	Pneumonia incidence on day 8 of ciclesonide inhalation	C	P	S
TCTR20200409006	Efficacy of HA330 Hemoperfusion in Critically Ill Patients with Severe COVID-19	28-day mortality [Timeframe day 28 after enrollment status of patient (alive/dead)]	M	P	H
PACTR202004801273802	Lagos COVID-19 Chloroquine Treatment Trial (LACCTT)	Status on 7-point ordinal scale	W	Q	S
TCTR20200404004	Comparative effectiveness of Chloroquine and Vitamin C prophylaxis in household contacts of confirmed COVID-19 patients	Seroconversion of SARS-CoV2 [Timeframe Day 21 Rate of seroconversion ]	S	P	S
RPCEC00000306	CIGB 2020 in contacts and SARS-CoV-2 infection suspects	Activation of markers of the innate immune system (in oropharyngeal scraping: relative concentration of dendritic cells; phenotypic analysis of leukocyte cells; transcriptional analysis of elements of molecules related to the immune response with expression at the level of epithelium and infiltrating leukocytes; quantification by ELISA of cytokines related to systemic inflammation such as IL-6, T…	L	Q	S
PER-010-20	SOLIDARITY	Outcome name:Ratio of the number of deaths among patients enrolled in the study<br>Measure:Provide reliable estimates of the effects of these antiviral treatments on hospital mortality in patients with moderate or severe COVID<br>Timepoints:5 months	M	P	H

## Sheet: Legend
QUALITATIVE READOUT		NUMERICAL READOUT		ENDPOINT STRENGTH
RADIOLOGY	R	PROPORTION	P	HARD	H
VIROLOGY	V	TIME-TO-EVENT	T	SOURROGATE	S
SEROLOGY	S	QUANTITY	Q	PREVENTIVE	P
OTHER LAB	L	OTHER	O	DIAGNOSTIC	D
CLINICAL	C			OTHER	O
WHO ORDINAL SCALE	W			TOXICITY	T
MORTALITY	M
OTHER	O
